# Supplementary material for: Organocatalytic asymmetric intramolecular [3+2] cycloaddition: A straightforward approach to access multiply substituted hexahydrochromeno[4,3-b]pyrrolidine derivatives in high optical purity
Source: Royal Society of Chemistry journal article supplement (doi:10.1039/c002369h), 2010-01-01
Supplement: c002369h.pdf [file c002369h.pdf]

## *Supplementary Information for*

### **Organocatalytic Asymmetric Intramolecular [3+2] Cycloaddition: A**

#### **Straightforward Approach to Access Multiply Substituted**

#### **Hexahydrochromeno[4,3-b]pyrrolidine Derivatives in High Optical Purity**

Nan Li,<sup>a,b</sup> Jin Song,<sup>c</sup> Xi-Feng Tu,<sup>c</sup> Bin Liu,<sup>c</sup> Xiao-Hua Chen,<sup>c</sup> and Liu-Zhu Gong<sup>a,c\*</sup>

*a. Chengdu Institute of Organic Chemistry, Chinese Academy of Sciences, Chengdu, 610041, China*

*b. Graduate School of Chinese Academy of Sciences, Beijing, 100049, China*

*c. Hefei National Laboratory for Physical Sciences at the Microscale and Department of Chemistry, University of Science and Technology of China, Hefei, 230026, China.*

*E-mail: [gonglz@ustc.edu.cn](mailto:gonglz@ustc.edu.cn)*

**General data:** NMR spectra were recorded on a Bruker-400 MHz spectrometer. Optical rotations were measured on a Perkin-Elmer 241 Polarimeter at  $\lambda = 589$  nm (sodium D line). HRMS (Micromass GCT-MS) spectra were recorded on P-SIMS-Gly of Bruker Daltonics Inc. Infrared spectra were recorded on a Nicolet MX-1E FT-IR spectrometer. Melting points were determined on a digital melting point apparatus and temperatures were uncorrected. HPLC analysis was performed on Waters-Breeze (2487 Dual  $\lambda$  Absorbance Detector and 1525 Binary HPLC Pump). Chiralpak AS, AD, OD and IA columns were purchased from Daicel Chemical Industries, Ltd. Toluene was refluxed with sodium and benzophenone and distilled prior to use. Petroleum ether and ethyl acetate for column chromatography were distilled before use. The relative and absolute configuration of **3d** was assigned by the X-ray analysis.

**Materials:** All starting materials were purchased from Acros, Alfa Aesar, Aldrich and used directly

**The preparation of chiral phosphoric acid 4g:** Chiral catalyst was prepared on the base of the literature procedures.<sup>1</sup>

**General Procedure for the synthesis of aldehyde substrates.** Different substituted 2-hydroxybenzaldehydes, (*E*)-ethyl 4-bromobut-2-enoate or (*E*)-methyl 4-bromobut-2-enoate and  $K_2CO_3$  were dissolved in DMF. After the reaction system was heated at 70 °C under argon for 4 hours, it was filtrated and then added  $H_2O$ . The mixture was extracted with EtOAc (20 ml X 3). The combined organic phases were washed with  $H_2O$  and saturated NaCl, and dried over anhydrous

Na<sub>2</sub>SO<sub>4</sub>. After removal of solvent under reduced pressure, the residue was purified through flash column chromatography on a silica gel (eluent: petroleum ether: ethyl acetate) to give the pure products.

**(E)-Ethyl 4-(2-formylphenoxy)but-2-enoate (1a).** 67% yield (Flash column chromatography eluent, petroleum ether / ethyl acetate = 80: 1 to 10: 1); yellow solid, mp: 66-68 °C; <sup>1</sup>H-NMR (CDCl<sub>3</sub>, 400 MHz) δ (ppm): 1.31 (t, *J*= 7.1 Hz, 3H), 4.20 (q, *J*= 7.1 Hz, 2H), 4.82 (q, *J*= 2.0 Hz, 2H), 6.19-6.24 (m, 1H), 6.94 (d, *J*= 8.4 Hz, 1H), 7.05-7.13 (m, 2H), 7.52-7.57 (m, 1H), 7.87 (dd, *J*<sub>1</sub>= 1.8 Hz, *J*<sub>2</sub>= 15.3 Hz, 1H), 10.56 (s, 1H); <sup>13</sup>C NMR (CDCl<sub>3</sub>, 101 MHz) δ (ppm): 14.59, 61.12, 67.29, 112.94, 121.85, 122.98, 129.25, 136.28, 141.51, 189.66; IR (KBr): γ 3399, 2986, 2874, 1714, 1688, 1663, 1600, 1479, 1438, 1379, 1305, 1249, 1183, 1075, 1041, 969, 946, 850, 769, 682, 661, 614 cm<sup>-1</sup>; HRMS (Micromass GCT-MS EI) exact mass calcd for (C<sub>13</sub>H<sub>14</sub>O<sub>4</sub>)<sup>+</sup> requires m/z 234.0892, found m/z 234.0891.

**(E)-Ethyl 4-(4-chloro-2-formylphenoxy)but-2-enoate (1b).** 67% yield (Flash column chromatography eluent, petroleum ether / ethyl acetate / CH<sub>2</sub>Cl<sub>2</sub>= 30: 1: 1); white solid, mp: 64-66 °C; <sup>1</sup>H-NMR (CDCl<sub>3</sub>, 400 MHz) δ (ppm): 1.26 (t, *J*= 7.1 Hz, 3H), 4.16 (q, *J*= 7.1 Hz, 2H), 4.77 (q, *J*= 2.0 Hz, 2H), 6.11-6.16 (m, 1H), 6.85 (d, *J*= 8.9 Hz, 1H), 7.00-7.06 (m, 1H), 7.44 (dd, *J*<sub>1</sub>= 2.7 Hz, *J*<sub>2</sub>= 17.7 Hz, 1H), 10.43 (s, 1H); <sup>13</sup>C NMR (CDCl<sub>3</sub>, 101 MHz) δ (ppm): 14.58, 61.19, 67.68, 114.61, 123.27, 126.42, 127.61, 128.77, 135.76, 140.96, 159.00, 166.02, 188.28; IR (KBr): γ 3408, 2986, 2908, 2869, 1719, 1684, 1594, 1482, 1437, 1307, 1272, 1183, 1127, 1040, 975, 844, 680 cm<sup>-1</sup>; HRMS (Micromass GCT-MS EI) exact mass calcd for (C<sub>13</sub>H<sub>13</sub>ClO<sub>4</sub>)<sup>+</sup> requires m/z 268.0502, found m/z 268.0506.

**(E)-Ethyl 4-(2-formyl-4-methoxyphenoxy)but-2-enoate (1c).** 72% yield (Flash column chromatography eluent, petroleum ether / ethyl acetate= 70: 1 to 40: 1); yellow solid, mp: 83-85 °C; <sup>1</sup>H-NMR (CDCl<sub>3</sub>, 400 MHz) δ (ppm): 1.30 (t, *J*= 7.1 Hz, 3H), 3.80 (s, 3H), 4.20 (q, *J*= 7.1 Hz, 2H), 4.78 (q, *J*= 2.0 Hz, 2H), 6.19 (d, *J*= 15.7 Hz, 1H), 6.90 (d, *J*= 9.0 Hz, 1H), 7.05-7.13 (m, 2H), 7.35 (d, *J*= 3.0 Hz, 1H), 10.51 (s, 1H); <sup>13</sup>C NMR (CDCl<sub>3</sub>, 101 MHz) δ (ppm): 14.22, 55.84, 60.71, 67.64, 110.72, 114.52, 122.48, 123.37, 125.47, 141.48, 154.18, 155.01, 165.83, 189.05; IR (KBr): γ 3438, 2981, 2874, 1720, 1677, 1616, 1496, 1450, 1285, 1214, 1184, 1087, 1035, 942, 873, 817, 728, 647 cm<sup>-1</sup>; HRMS (Micromass GCT-MS EI) exact mass calcd for (C<sub>14</sub>H<sub>16</sub>O<sub>5</sub>)<sup>+</sup> requires m/z 264.0998, found m/z 264.0991.

**(E)-Ethyl 4-(2-formyl-5-methoxyphenoxy)but-2-enoate (1d).** 78% yield (Flash column

chromatography eluent, petroleum ether / ethyl acetate= 70: 1 to 40: 1); yellow solid, mp: 91-93 °C; <sup>1</sup>H-NMR (CDCl<sub>3</sub>, 400 MHz) δ (ppm): 1.31 (t, *J*= 7.1 Hz, 3H), 3.86 (s, 3H), 4.20 (q, *J*= 7.1 Hz, 2H), 4.78 (q, *J*= 2.1 Hz, 2H), 6.19-6.24 (m, 1H), 6.40 (d, *J*= 2.2 Hz, 1H), 6.57-6.60 (m, 1H), 7.05-7.11 (m, 1H), 7.84 (d, *J*= 8.7 Hz, 1H), 10.37 (s, 1H); <sup>13</sup>C NMR (CDCl<sub>3</sub>, 101 MHz) δ (ppm): 14.21, 55.71, 60.73, 66.86, 99.06, 106.34, 119.29, 122.59, 130.94, 140.99, 161.89, 165.80, 166.08, 187.83; IR (KBr): γ 3426, 3072, 2856, 1719, 1671, 1607, 1505, 1427, 1282, 1201, 1172, 1123, 1084, 1039, 957, 882, 811, 647 cm<sup>-1</sup>; HRMS (Micromass GCT-MS EI) exact mass calcd for (C<sub>14</sub>H<sub>16</sub>O<sub>5</sub>)<sup>+</sup> requires m/z 264.0998, found m/z 264.0994.

**(E)-Ethyl 4-(2-formyl-6-methoxyphenoxy)but-2-enoate (1e).** 78% yield (Flash column chromatography eluent, petroleum ether / ethyl acetate= 40: 1 to petroleum ether / ethyl acetate / CH<sub>2</sub>Cl<sub>2</sub>= 30: 1: 1); white solid, mp: 56-58 °C; <sup>1</sup>H-NMR (CDCl<sub>3</sub>, 400 MHz) δ (ppm): 1.25 (t, *J*= 7.1 Hz, 3H), 3.84 (s, 3H), 4.15 (q, *J*= 7.1 Hz, 2H), 4.76 (q, *J*= 1.9 Hz, 2H), 6.15-6.20 (m, 1H), 7.00-7.06 (m, 1H), 7.10-7.11 (m, 1H), 7.36-7.39 (m, 1H), 10.38 (s, 1H); <sup>13</sup>C NMR (CDCl<sub>3</sub>, 101 MHz) δ (ppm): 14.61, 56.49, 60.95, 72.89, 118.53, 119.82, 122.67, 124.95, 130.23, 142.57, 151.16, 153.18, 166.39, 190.16; IR (KBr): γ 3434, 2986, 2904, 1711, 1660, 1586, 1482, 1433, 1305, 1270, 1178, 1073, 1044, 961, 922, 843, 786, 744 cm<sup>-1</sup>; HRMS (Micromass GCT-MS EI) exact mass calcd for (C<sub>14</sub>H<sub>16</sub>O<sub>5</sub>)<sup>+</sup> requires m/z 264.0998, found m/z 264.0996.

**(E)-Ethyl 4-(2-ethoxy-6-formylphenoxy)but-2-enoate (1f).** 78% yield (Flash column chromatography eluent, petroleum ether / ethyl acetate = 70: 1 to 40: 1); white solid, mp: 52-53 °C; <sup>1</sup>H-NMR (CDCl<sub>3</sub>, 400 MHz) δ (ppm): 1.28-1.32 (m, 3H), 1.44-1.48 (m, 3H), 4.07-4.13 (m, 2H), 4.19-4.25 (m, 2H), 4.83-4.85 (m, 2H), 6.21-6.26 (m, 2H), 7.06-7.15 (m, 3H), 7.39-7.43 (m, 1H), 10.43 (s, 1H); <sup>13</sup>C NMR (CDCl<sub>3</sub>, 101 MHz) δ (ppm): 14.24, 14.82, 60.56, 64.75, 72.48, 119.22, 119.35, 122.25, 124.47, 129.88, 142.39, 151.03, 152.07, 166.05, 189.88; IR (KBr): γ 3413, 2986, 2899, 1718, 1697, 1659, 1585, 1480, 1400, 1304, 1279, 1209, 1178, 1065, 958, 924, 869, 782, 746 cm<sup>-1</sup>; HRMS (Micromass GCT-MS EI) exact mass calcd for (C<sub>15</sub>H<sub>18</sub>O<sub>5</sub>)<sup>+</sup> requires m/z 278.1154, found m/z 278.1146.

**(E)-Ethyl 4-(2-fluoro-6-formylphenoxy)but-2-enoate (1g).** 89% yield (Flash column chromatography eluent, petroleum ether / ethyl acetate= 70: 1 to 10: 1); white solid, mp: 67-68 °C; <sup>1</sup>H-NMR (CDCl<sub>3</sub>, 400 MHz) δ (ppm): 1.31 (t, *J*= 7.1 Hz, 3H), 4.20 (q, *J*= 7.1 Hz, 2H), 4.91-4.93 (m, 2H), 6.20-6.25 (m, 1H), 7.03-7.14 (m, 1H), 7.32-7.38 (m, 1H), 7.62-7.64 (m, 1H), 10.43 (s, 1H); <sup>13</sup>C NMR (CDCl<sub>3</sub>, 101 MHz) δ (ppm): 14.22, 60.71, 72.79 (d, *J*= 7.4 Hz), 122.84, 122.91 (d, *J*=

19.3 Hz), 123.82 (d,  $J= 3.3$  Hz), 124.06 (d,  $J= 7.3$  Hz), 130.17 (d,  $J= 1.6$  Hz), 141.23, 148.51 (d,  $J= 10.7$  Hz), 154.84 (d,  $J= 247.6$  Hz), 165.79, 188.46 (d,  $J= 3.3$  Hz); IR (KBr):  $\gamma$  3430, 2986, 2874, 1722, 1690, 1481, 1382, 1303, 1270, 1180, 1078, 1035, 960, 927, 791, 779, 735, 681  $\text{cm}^{-1}$ ; HRMS (Micromass GCT-MS EI) exact mass calcd for  $(\text{C}_{13}\text{H}_{13}\text{FO}_4)^+$  requires  $m/z$  252.0798, found  $m/z$  252.0792.

**(E)-Methyl 4-(2-formylphenoxy)but-2-enoate (1h).** 60% yield (Flash column chromatography eluent, petroleum ether / ethyl acetate = 10: 1 to petroleum ether / ethyl acetate /  $\text{CH}_2\text{Cl}_2$  =15: 1); white solid, mp: 65-66 °C;  $^1\text{H-NMR}$  ( $\text{CDCl}_3$ , 400 MHz)  $\delta$  (ppm): 3.73 (s, 3H), 4.78-4.80 (m, 2H), 6.15-6.20 (m, 1H), 6.79 (d,  $J= 8.4$  Hz, 1H), 7.00-7.10 (m, 2H), 7.47-7.52 (m, 1H), 7.80-7.83 (m, 1H), 10.50 (s, 1H);  $^{13}\text{C}$  NMR ( $\text{CDCl}_3$ , 101 MHz)  $\delta$  (ppm): 52.19, 67.25, 98.77, 112.94, 121.86, 122.54, 125.57, 129.28, 136.28, 141.86, 160.53, 166.61, 189.61; IR (KBr):  $\gamma$  3426, 2951, 2861, 2766, 1719, 1683, 1599, 1494, 1442, 1390, 1312, 1239, 1165, 1108, 1017, 960, 849, 769, 739, 662, 612  $\text{cm}^{-1}$ ; HRMS (Micromass GCT-MS EI) exact mass calcd for  $(\text{C}_{12}\text{H}_{12}\text{O}_4)^+$  requires  $m/z$  220.0736, found  $m/z$  220.0731.

**General Procedure for the organocatalytic enantioselectivity intramolecular [3+2] reaction.**

Aldehyde (0.24 mmol), amine (0. 20 mmol), 400mg 3Å MS and catalyst (0.02 mmol) were dissolved in toluene (1 mL), the reaction mixture was stirred at 25 °C for 72 hours. Then filtrate and added the saturated  $\text{NaHCO}_3$  to the reaction mixture, extract with  $\text{CH}_2\text{Cl}_2$  (10 ml X 3), dry with anhydrous  $\text{Na}_2\text{SO}_4$  and rotary evaporate the solvent. The mixture was purified through flash column chromatography on a silica gel (eluent: petroleum ether: ethyl acetate) to give the pure products.

**(2S,3S,3aS,9bS)-3-Ethyl-2-methyl-2-phenyl-1,2,3,3a,4,9b-hexahydrochromeno[4,3-b]pyrrole-2,3-dicarboxylate (3a).** 33.2 mg (This template reaction was carried out at 0.1 mmol scale and flash column chromatography eluent, petroleum ether to petroleum ether / ethyl acetate = 15: 1), 94% yield; yellow solid; mp: 76-78°C;  $[\alpha]_D^{20} = -7.95^\circ$  ( $c = 0.088$ , EtOAc);  $^1\text{H-NMR}$  ( $\text{CDCl}_3$ , 400 MHz)  $\delta$  (ppm): 1.35 (t,  $J= 7.2$  Hz, 3H), 2.52-2.62 (m, 1H), 3.21 (d,  $J= 11.6$  Hz, 1H), 3.31 (s, 1H), 3.63 (s, 3H), 3.68 (bs, 1H), 4.07 (dd,  $J_1= 10.2$  Hz,  $J_2= 11.6$  Hz, 1H), 4.17-4.32 (m, 2H), 4.50 (dd,  $J_1= 4.2$  Hz,  $J_2= 10.1$  Hz, 1H), 6.82-6.84 (m, 1H), 6.92-6.96 (m, 1H), 7.15-7.20 (m, 1H), 7.28-7.32 (m, 1H), 7.35-7.40 (m, 2H), 7.48-7.50 (m, 1H), 7.93-7.96 (m, 2H);  $^{13}\text{C}$  NMR ( $\text{CDCl}_3$ , 101 MHz)  $\delta$  (ppm): 14.20, 49.46, 53.18, 58.78, 60.74, 61.52, 68.99, 77.62, 116.09, 120.32, 124.42, 124.93, 127.44, 127.80, 128.24, 128.72, 143.09, 153.24, 171.83, 172.19; IR (KBr):  $\gamma$  3448, 3284, 2960, 17336, 1610, 1489, 1456, 1253, 1179, 1092, 1036, 989, 837, 756, 699  $\text{cm}^{-1}$ ; HRMS (Micromass GCT-MS EI)

exact mass calcd for  $(C_{22}H_{23}NO_5)^+$  requires  $m/z$  381.1576, found  $m/z$  381.1575; Enantiomeric excess: 91%, determined by HPLC (Daicel Chirapak AD-H, hexane/ isopropanol = 90: 10, flow rate 1.0 mL/min):  $T_R$  = 9.55 min (major),  $T_R$  = 10.78 min (minor).

**(2S,3S,3aS,9bS)-3-Ethyl-2-methyl-2-(2-chlorophenyl)-1,2,3,3a,4,9b-hexahydrochromeno[4,3-b]pyrrole-2,3-dicarboxylate (3b).** 73.5 mg (Flash column chromatography eluent, petroleum ether / ethyl acetate = 10: 1), 89% yield;  $[\alpha]_D^{20}$  = +105.62° (c = 1.070, EtOAc);  $^1H$ -NMR ( $CDCl_3$ , 400 MHz)  $\delta$  (ppm): 1.26 (t,  $J$  = 7.1 Hz, 3H), 2.65-2.68 (m, 1H), 3.61 (d,  $J$  = 12.1 Hz, 1H), 3.64 (s, 3H), 3.74 (bs, 1H), 4.12-4.23 (m, 3H), 4.53 (dd,  $J_1$  = 4.2 Hz,  $J_2$  = 10.0 Hz, 1H), 6.83 (dd,  $J_1$  = 1.0 Hz,  $J_2$  = 8.2 Hz, 1H); 6.88-6.92 (m, 1H), 7.14-7.18 (m, 2H), 7.29-7.35 (m, 3H), 7.42-7.44 (m, 1H), 7.99 (dd,  $J_1$  = 1.8 Hz,  $J_2$  = 7.8 Hz, 1H);  $^{13}C$  NMR ( $CDCl_3$ , 101 MHz)  $\delta$  (ppm): 14.15, 46.10, 53.48, 55.01, 58.75, 61.50, 68.90, 76.33, 115.97, 120.37, 124.48, 124.60, 126.48, 128.62, 131.39, 134.81, 139.63, 153.06, 170.34, 172.92; IR (KBr):  $\gamma$  3448, 3287, 2929, 1739, 1609, 1458, 1330, 1266, 1176, 1038, 984, 848, 758, 747  $cm^{-1}$ ; HRMS (Micromass GCT-MS EI) exact mass calcd for  $(C_{22}H_{22}ClNO_5)^+$  requires  $m/z$  415.1187, found  $m/z$  415.1181; Enantiomeric excess: 87%, determined by HPLC (Daicel Chirapak AD-H, hexane/ isopropanol = 90: 10, flow rate 1.0 mL/min):  $T_R$  = 12.16 min (major),  $T_R$  = 20.42 min (minor).

**(2S,3S,3aS,9bS)-3-Ethyl-2-methyl-2-(3-chlorophenyl)-1,2,3,3a,4,9b-hexahydrochromeno[4,3-b]pyrrole-2,3-dicarboxylate (3c).** 71.2 mg (Flash column chromatography eluent, petroleum ether / ethyl acetate = 15: 1), 86% yield; white solid, mp: 103-105 °C;  $[\alpha]_D^{20}$  = -13.54° (c = 0.128, EtOAc);  $^1H$ -NMR ( $CDCl_3$ , 400 MHz)  $\delta$  (ppm): 1.36 (t,  $J$  = 7.1 Hz, 3H), 2.51-2.61 (m, 1H), 3.14 (d,  $J$  = 11.7 Hz, 1H), 3.31 (d,  $J$  = 12.5 Hz, 1H), 3.60 (d,  $J$  = 11.7 Hz, 1H), 3.64 (s, 3H), 4.07 (dd,  $J_1$  = 10.2 Hz,  $J_2$  = 11.5 Hz, 1H), 4.18-4.32 (m, 2H), 4.50 (dd,  $J_1$  = 4.2 Hz,  $J_2$  = 10.2 Hz, 1H), 6.83 (dd,  $J_1$  = 0.8 Hz,  $J_2$  = 8.2 Hz, 1H); 6.92-6.96 (m, 1H), 7.16-7.20 (m, 1H), 7.26-7.33 (m, 2H), 7.46-7.48 (m, 1H), 7.82-7.85 (m, 1H), 7.99 (t,  $J$  = 1.6 Hz, 1H);  $^{13}C$  NMR ( $CDCl_3$ , 101 MHz)  $\delta$  (ppm): 14.17, 49.27, 53.37, 58.88, 60.76, 61.66, 68.89, 77.21, 116.14, 120.38, 124.12, 124.90, 125.90, 127.67, 129.50, 134.21, 145.25, 153.23, 171.33, 171.79; IR (KBr):  $\gamma$  3296, 2986, 1739, 1597, 1570, 1488, 1458, 1432, 1371, 1250, 1207, 1181, 1036, 995, 833, 759, 698  $cm^{-1}$ ; HRMS (Micromass GCT-MS EI) exact mass calcd for  $(C_{22}H_{22}ClNO_5)^+$  requires  $m/z$  415.1187, found  $m/z$  415.1192; Enantiomeric excess: 92%, determined by HPLC (Daicel Chirapak OD-H, hexane/ isopropanol = 85: 15, flow rate 1.0 mL/min):  $T_R$  = 6.32 min (minor),  $T_R$  = 10.01 min (major).

**(2S,3S,3aS,9bS)-3-Ethyl-2-methyl-2-(4-chlorophenyl)-1,2,3,3a,4,9b-hexahydrochromeno[4,3-b]**

**pyrrole-2,3-dicarboxylate (3d).** 66.4 mg (Flash column chromatography eluent, petroleum ether / ethyl acetate = 15: 1), 80% yield; white solid, mp: 129-130 °C;  $[\alpha]_D^{20} = -5.76^\circ$  (c = 0.110, EtOAc);  $^1\text{H-NMR}$  ( $\text{CDCl}_3$ , 400 MHz)  $\delta$  (ppm): 1.34 (t,  $J = 7.1$  Hz, 3H), 2.51-2.61 (m, 1H), 3.12 (d,  $J = 11.6$  Hz, 1H), 3.30 (d,  $J = 12.0$  Hz, 1H), 3.59 (d,  $J = 11.6$  Hz, 1H), 3.63 (s, 3H), 4.06 (dd,  $J_1 = 10.2$  Hz,  $J_2 = 11.6$  Hz, 1H), 4.17-4.31 (m, 2H), 4.49 (dd,  $J_1 = 4.2$  Hz,  $J_2 = 10.2$  Hz, 1H), 6.83 (dd,  $J_1 = 0.8$  Hz,  $J_2 = 8.2$  Hz, 1H); 7.16-7.20 (m, 1H), 7.32-7.35 (m, 2H), 7.45-7.47 (m, 1H), 7.88-7.92 (m, 2H);  $^{13}\text{C}$  NMR ( $\text{CDCl}_3$ , 101 MHz)  $\delta$  (ppm): 14.20, 49.42, 53.31, 58.87, 60.89, 61.64, 68.92, 77.19, 116.15, 120.37, 124.15, 124.86, 128.36, 128.83, 128.99, 133.80, 141.66, 153.23, 171.46, 171.89; IR (KBr):  $\gamma$  3448, 3309, 2926, 1729, 1611, 1492, 1455, 1332, 1254, 1176, 1089, 979, 838, 770  $\text{cm}^{-1}$ ; HRMS (Micromass GCT-MS EI) exact mass calcd for  $(\text{C}_{22}\text{H}_{22}\text{ClNO}_5)^+$  requires m/z 415.1187, found m/z 415.1181; Enantiomeric excess: 90%, determined by HPLC (Daicel Chirapak OD-H, hexane/ isopropanol = 85: 15, flow rate 1.0 mL/min):  $T_R = 6.69$  min (minor),  $T_R = 9.31$  min (major).

**(2S,3S,3aS,9bS)-3-Ethyl-2-methyl-2-(2-fluorophenyl)-1,2,3,3a,4,9b-hexahydrochromeno[4,3-b] pyrrole-2,3-dicarboxylate (3e).** 74.5 mg (Flash column chromatography eluent, petroleum ether / ethyl acetate = 15: 1), 93% yield;  $[\alpha]_D^{20} = +16.67^\circ$  (c = 0.990, EtOAc);  $^1\text{H-NMR}$  ( $\text{CDCl}_3$ , 400 MHz)  $\delta$  (ppm): 1.29 (t,  $J = 7.1$  Hz, 3H), 2.42-2.52 (m, 1H), 3.26 (dd,  $J_1 = 1.8$  Hz,  $J_2 = 11.9$  Hz, 1H), 3.44 (s, 1H), 3.69 (bs, 4H), 4.11-4.27 (m, 3H), 4.54 (dd,  $J_1 = 4.2$  Hz,  $J_2 = 10.2$  Hz, 1H), 6.83 (dd,  $J_1 = 0.9$  Hz,  $J_2 = 8.2$  Hz, 1H), 6.90-6.94 (m, 1H), 7.06-7.19 (m, 3H); 7.28-7.32 (m, 1H), 7.40-7.42 (m, 1H), 8.01-8.05 (m, 1H);  $^{13}\text{C}$  NMR ( $\text{CDCl}_3$ , 101 MHz)  $\delta$  (ppm): 14.22, 48.39, 53.33, 58.38, 58.94, 61.28, 69.19, 74.03 (d,  $J = 2.4$  Hz), 116.07, 116.29 (d,  $J = 22.8$  Hz), 120.35, 123.84 (d,  $J = 3.3$  Hz), 124.29, 124.76, 128.09 (d,  $J = 3.4$  Hz), 128.73, 129.87 (d,  $J = 8.6$  Hz), 129.99 (d,  $J = 11.3$  Hz), 153.25, 161.46 (d,  $J = 247.0$  Hz), 171.11, 172.01; IR (KBr):  $\gamma$  3443, 3289, 2929, 1741, 1579, 1479, 1460, 1334, 1303, 1262, 1173, 1033, 979, 823, 763, 747  $\text{cm}^{-1}$ ; HRMS (Micromass GCT-MS EI) exact mass calcd for  $(\text{C}_{22}\text{H}_{22}\text{FNO}_5)^+$  requires m/z 399.1482, found m/z 399.1477; Enantiomeric excess: 94%, determined by HPLC (Daicel Chirapak OD-H, hexane/ isopropanol = 85: 15, flow rate 1.0 mL/min):  $T_R = 7.82$  min (minor),  $T_R = 13.65$  min (major).

**(2S,3S,3aS,9bS)-3-Ethyl-2-methyl-2-(3-fluorophenyl)-1,2,3,3a,4,9b-hexahydrochromeno[4,3-b] pyrrole-2,3-dicarboxylate (3f).** 65.1 mg (Flash column chromatography eluent, petroleum ether / ethyl acetate = 15: 1), 82% yield; white solid, mp: 64-66 °C;  $[\alpha]_D^{20} = -11.04^\circ$  (c = 0.154, EtOAc);  $^1\text{H-NMR}$  ( $\text{CDCl}_3$ , 400 MHz)  $\delta$  (ppm): 1.36 (t,  $J = 7.2$  Hz, 3H), 2.51-2.61 (m, 1H), 3.15 (d,  $J = 11.6$  Hz, 1H), 3.61 (d,  $J = 11.1$  Hz, 1H), 3.64 (s, 3H), 4.07 (dd,  $J_1 = 10.2$  Hz,  $J_2 = 11.6$  Hz, 1H), 4.20-4.30

(m, 2H), 4.50 (dd,  $J_1 = 4.2$  Hz,  $J_2 = 10.2$  Hz, 1H), 6.83 (dd,  $J_1 = 0.9$  Hz,  $J_2 = 8.2$  Hz, 1H), 6.92-6.96 (m, 1H), 6.97-7.02 (m, 1H), 7.16-7.20 (m, 1H); 7.31-7.36 (m, 1H), 7.46-7.48 (m, 1H), 7.70-7.74 (m, 2H);  $^{13}\text{C}$  NMR ( $\text{CDCl}_3$ , 101 MHz)  $\delta$  (ppm): 14.18, 49.33, 53.33, 58.87, 60.78, 61.65, 68.90, 77.27, 114.59 (d,  $J = 1.4$  Hz), 114.81, 116.14, 120.38, 123.24 (d,  $J = 2.8$  Hz), 124.14, 124.89, 128.82, 129.65 (d,  $J = 8.0$  Hz), 145.84 (d,  $J = 7.0$  Hz), 153.23, 162.77 (d,  $J = 243.6$  Hz), 171.36, 171.85; IR (KBr):  $\gamma$  3296, 2951, 1740, 1609, 1591, 1491, 1454, 1250, 1202, 1169, 1036, 995, 831, 755, 688  $\text{cm}^{-1}$ ; HRMS (Micromass GCT-MS EI) exact mass calcd for  $(\text{C}_{22}\text{H}_{22}\text{FNO}_5)^+$  requires  $m/z$  399.1482, found  $m/z$  399.1490; Enantiomeric excess: 90%, determined by HPLC (Daicel Chirapak OD-H, hexane/ isopropanol = 85: 15, flow rate 1.0 mL/min):  $T_R = 6.13$  min (minor),  $T_R = 9.92$  min (major).

**(2*S*,3*S*,3*aS*,9*bS*)-3-Ethyl-2-methyl-2-(4-fluorophenyl)-1,2,3,3*a*,4,9*b*-hexahydrochromeno[4,3-*b*]pyrrole-2,3-dicarboxylate (3g).** 67 mg (Flash column chromatography eluent, petroleum ether / ethyl acetate = 15: 1), 84% yield; white solid, mp: 124-126 °C;  $[\alpha]_D^{20} = -8.46^\circ$  ( $c = 0.134$ , EtOAc);  $^1\text{H}$ -NMR ( $\text{CDCl}_3$ , 400 MHz)  $\delta$  (ppm): 1.35 (t,  $J = 7.1$  Hz, 3H), 2.52-2.61 (m, 1H), 3.14 (d,  $J = 11.6$  Hz, 1H), 3.31 (d,  $J = 11.4$  Hz, 1H), 3.59 (bs, 1H), 3.63 (s, 3H), 4.07 (dd,  $J_1 = 10.2$  Hz,  $J_2 = 11.6$  Hz, 1H), 4.17-4.32 (m, 2H), 4.49 (dd,  $J_1 = 4.2$  Hz,  $J_2 = 10.1$  Hz, 1H), 6.83 (dd,  $J_1 = 0.8$  Hz,  $J_2 = 8.2$  Hz, 1H); 6.92-6.96 (m, 1H), 7.02-7.08 (m, 2H), 7.16-7.20 (m, 1H), 7.46-7.48 (m, 2H), 7.91-7.96 (m, 2H);  $^{13}\text{C}$  NMR ( $\text{CDCl}_3$ , 101 MHz)  $\delta$  (ppm): 14.19, 49.48, 53.24, 58.81, 60.99, 61.60, 68.93, 77.17, 115.00 (d,  $J = 21.3$  Hz), 116.14, 120.36, 124.22, 124.87, 128.80, 129.29 (d,  $J = 8.0$  Hz), 138.80 (d,  $J = 3.0$  Hz), 153.24, 162.43 (d,  $J = 245.3$  Hz), 171.66, 171.98; IR (KBr):  $\gamma$  3438, 3277, 2921, 1735, 1610, 1509, 1489, 1461, 1255, 1088, 1038, 994, 848, 815, 758  $\text{cm}^{-1}$ ; HRMS (Micromass GCT-MS EI) exact mass calcd for  $(\text{C}_{22}\text{H}_{22}\text{FNO}_5)^+$  requires  $m/z$  399.1482, found  $m/z$  399.1489; Enantiomeric excess: 91%, determined by HPLC (Daicel Chirapak OD-H, hexane/ isopropanol = 85: 15, flow rate 1.0 mL/min):  $T_R = 6.18$  min (minor),  $T_R = 14.41$  min (major).

**(2*S*,3*S*,3*aS*,9*bS*)-3-Ethyl-2-methyl-2-(4-methoxyphenyl)-1,2,3,3*a*,4,9*b*-hexahydrochromeno[4,3-*b*]pyrrole-2,3-dicarboxylate (3h).** 53.3 mg (Flash column chromatography eluent, petroleum ether / ethyl acetate = 15: 1), 65% yield; colorless oil;  $[\alpha]_D^{20} = -1.13^\circ$  ( $c = 0.800$ , EtOAc);  $^1\text{H}$ -NMR ( $\text{CDCl}_3$ , 400 MHz)  $\delta$  (ppm): 1.34 (t,  $J = 7.2$  Hz, 3H), 2.50-2.60 (m, 1H), 3.16 (d,  $J = 11.6$  Hz, 1H), 3.62 (s, 1H), 3.67 (bs, 1H), 3.81 (s, 3H), 4.07 (dd,  $J_1 = 10.2$  Hz,  $J_2 = 11.6$  Hz, 1H), 4.16-4.31 (m, 2H), 4.49 (dd,  $J_1 = 4.2$  Hz,  $J_2 = 10.1$  Hz, 1H), 6.83 (dd,  $J_1 = 0.9$  Hz,  $J_2 = 8.2$  Hz, 1H), 6.88-6.95 (m, 3H), 7.15-7.19 (m, 1H), 7.47-7.49 (m, 1H); 7.84-7.88 (m, 2H);  $^{13}\text{C}$  NMR ( $\text{CDCl}_3$ , 101 MHz)  $\delta$

(ppm): 14.21, 49.52, 53.12, 55.27, 58.74, 60.85, 61.47, 69.01, 77.34, 113.56, 116.08, 120.30, 124.48, 124.92, 128.62, 128.69, 135.09, 153.26, 159.23, 172.03, 172.25; IR (KBr):  $\gamma$  3451, 3272, 2926, 1738, 1611, 1579, 1510, 1486, 1460, 1246, 1180, 1025, 991, 846, 756  $\text{cm}^{-1}$ ; HRMS (Micromass GCT-MS EI) exact mass calcd for  $(\text{C}_{23}\text{H}_{25}\text{NO}_6)^+$  requires  $m/z$  411.1682, found  $m/z$  411.1679; Enantiomeric excess: 81%, determined by HPLC (Daicel Chirapak OD-H, hexane/ isopropanol = 70: 30, flow rate 1.0 mL/min):  $T_R = 7.36$  min (minor),  $T_R = 15.04$  min (major).

**(2S,3S,3aS,9bS)-3-Ethyl-2-methyl-8-chloro-2-phenyl-1,2,3,3a,4,9b-hexahydrochromeno[4,3-b]pyrrole-2,3-dicarboxylate (5a).** 49.7 mg (Flash column chromatography eluent, petroleum ether / ethyl acetate = 4: 1), 60% yield; colorless oil;  $[\alpha]_D^{20} = -7.09^\circ$  ( $c = 0.094$ , EtOAc);  $^1\text{H-NMR}$  ( $\text{CDCl}_3$ , 400 MHz)  $\delta$  (ppm): 1.35 (t,  $J = 7.1$  Hz, 3H), 2.48-2.57 (m, 1H), 3.20 (d,  $J = 11.6$  Hz, 1H), 3.28 (d,  $J = 8.7$  Hz, 1H), 3.59 (d,  $J = 7.9$  Hz, 1H), 3.63 (s, 3H), 4.04 (dd,  $J_1 = 10.2$  Hz,  $J_2 = 11.6$  Hz, 1H), 4.18-4.32 (m, 2H), 4.49 (dd,  $J_1 = 4.3$  Hz,  $J_2 = 10.2$  Hz, 1H), 6.75 (d,  $J = 8.7$  Hz, 1H), 7.10-7.13 (m, 1H), 7.28-7.32 (m, 1H), 7.35-7.40 (m, 2H), 7.47 (dd,  $J_1 = 1.1$  Hz,  $J_2 = 2.6$  Hz, 1H), 7.92-7.94 (m, 2H);  $^{13}\text{C NMR}$  ( $\text{CDCl}_3$ , 101 MHz)  $\delta$  (ppm): 14.20, 49.07, 53.25, 58.48, 60.54, 61.60, 69.07, 77.54, 117.48, 124.86, 125.20, 125.77, 127.39, 127.90, 128.29, 128.60, 142.82, 151.85, 171.69, 172.00; IR (KBr):  $\gamma$  3292, 2981, 1738, 1600, 1483, 1432, 1373, 1255, 1205, 1182, 1101, 1035, 991, 817, 745, 701  $\text{cm}^{-1}$ ; HRMS (Micromass GCT-MS EI) exact mass calcd for  $(\text{C}_{22}\text{H}_{22}\text{ClNO}_5)^+$  requires  $m/z$  415.1187, found  $m/z$  415.1186; Enantiomeric excess: 53%, determined by HPLC (Daicel Chirapak IA-H, hexane/ isopropanol = 95: 5, flow rate 1.0 mL/min):  $T_R = 10.54$  min (minor),  $T_R = 11.30$  min (major).

**(2S,3S,3aS,9bS)-3-Ethyl-2-methyl-8-methoxy-2-phenyl-1,2,3,3a,4,9b-hexahydrochromeno[4,3-b]pyrrole-2,3-dicarboxylate (5b).** 45.8 mg (Flash column chromatography eluent, petroleum ether / ethyl acetate = 15: 1), 56% yield; colorless oil;  $[\alpha]_D^{20} = -12.14^\circ$  ( $c = 0.626$ , EtOAc);  $^1\text{H-NMR}$  ( $\text{CDCl}_3$ , 400 MHz)  $\delta$  (ppm): 1.35 (t,  $J = 7.2$  Hz, 3H), 2.50-2.60 (m, 1H), 3.20 (d,  $J = 11.6$  Hz, 1H), 3.30 (s, 1H), 3.63 (bs, 4H), 3.81 (s, 3H), 4.01 (dd,  $J_1 = 10.2$  Hz,  $J_2 = 11.6$  Hz, 1H), 4.17-4.32 (m, 2H), 4.45 (dd,  $J_1 = 4.2$  Hz,  $J_2 = 10.1$  Hz, 1H), 6.74-6.75 (m, 2H), 7.05-7.06 (m, 1H), 7.28-7.32 (m, 1H), 7.36-7.40 (m, 2H); 7.94-7.96 (m, 2H);  $^{13}\text{C NMR}$  ( $\text{CDCl}_3$ , 101 MHz)  $\delta$  (ppm): 14.20, 49.62, 53.19, 55.90, 58.99, 60.75, 61.51, 68.65, 77.56, 109.71, 114.74, 116.77, 124.77, 127.42, 127.82, 128.25, 143.03, 147.09, 153.50, 171.82, 172.20; IR (KBr):  $\gamma$  3296, 2956, 1732, 1601, 1492, 1432, 1370, 1256, 1203, 1036, 997, 861, 817, 737, 699  $\text{cm}^{-1}$ ; HRMS (Micromass GCT-MS EI) exact mass calcd for  $(\text{C}_{23}\text{H}_{25}\text{NO}_6)^+$  requires  $m/z$  411.1682, found  $m/z$  411.1675; Enantiomeric excess: 68%,



determined by HPLC (Daicel Chirapak AD-H, hexane/ isopropanol = 90: 10, flow rate 1.0 mL/min):  $T_R = 18.53$  min (minor),  $T_R = 21.65$  min (major).

**(2S,3S,3aS,9bS)-3-Ethyl-2-methyl-7-methoxy-2-phenyl-1,2,3,3a,4,9b-hexahydrochromeno[4,3-b]pyrrole-2,3-dicarboxylate (5c).** 34.6 mg (Flash column chromatography eluent, petroleum ether / ethyl acetate = 10: 1), 42% yield; colorless oil;  $[\alpha]_D^{20} = -13.06^\circ$  (c = 0.444, EtOAc);  $^1\text{H-NMR}$  ( $\text{CDCl}_3$ , 400 MHz)  $\delta$  (ppm): 1.35 (t,  $J = 7.1$  Hz, 3H), 2.47-2.57 (m, 1H), 3.19 (d,  $J = 11.6$  Hz, 1H), 3.24 (s, 1H), 3.57 (d,  $J = 11.7$  Hz, 1H), 3.62 (s, 3H), 3.76 (s, 3H), 4.04 (dd,  $J_1 = 10.2$  Hz,  $J_2 = 11.6$  Hz, 1H), 4.17-4.32 (m, 2H), 4.48 (dd,  $J_1 = 4.2$  Hz,  $J_2 = 10.1$  Hz, 1H), 6.41 (d,  $J = 2.4$  Hz, 1H), 6.51 (dd,  $J_1 = 2.5$  Hz,  $J_2 = 8.4$  Hz, 1H), 7.27-7.31 (m, 1H), 7.35-7.39 (m, 3H); 7.93-7.96 (m, 2H);  $^{13}\text{C}$  NMR ( $\text{CDCl}_3$ , 101 MHz)  $\delta$  (ppm): 14.20, 49.92, 53.16, 55.34, 58.48, 60.62, 61.49, 69.08, 77.69, 101.66, 106.47, 116.90, 125.60, 127.43, 127.77, 128.21, 143.15, 154.30, 160.25, 171.84, 172.23; IR (KBr):  $\gamma$  3296, 2956, 1738, 1622, 1579, 1508, 1443, 1373, 1322, 1257, 1159, 1036, 856, 793, 699, 635  $\text{cm}^{-1}$ ; HRMS (Micromass GCT-MS EI) exact mass calcd for  $(\text{C}_{23}\text{H}_{25}\text{NO}_6)^+$  requires m/z 411.1682, found m/z 411.1675; Enantiomeric excess: 90%, determined by HPLC (Daicel Chirapak OD-H, hexane/ isopropanol = 95: 5, flow rate 1.0 mL/min):  $T_R = 10.30$  min (major),  $T_R = 13.52$  min (minor).

**(2S,3S,3aS,9bS)-3-Ethyl-2-methyl-6-methoxy-2-phenyl-1,2,3,3a,4,9b-hexahydrochromeno[4,3-b]pyrrole-2,3-dicarboxylate (5d).** 44 mg (Flash column chromatography eluent, petroleum ether / ethyl acetate = 8: 1), 54% yield; colorless oil;  $[\alpha]_D^{20} = -11.29^\circ$  (c = 0.558, EtOAc);  $^1\text{H-NMR}$  ( $\text{CDCl}_3$ , 400 MHz)  $\delta$  (ppm): 1.34 (t,  $J = 7.1$  Hz, 3H), 2.55-2.64 (m, 1H), 3.21 (d,  $J = 11.6$  Hz, 1H), 3.30 (s, 1H), 3.62 (s, 3H), 3.69 (d,  $J = 19.8$  Hz, 1H), 3.87 (s, 3H), 4.13 (dd,  $J_1 = 10.2$  Hz,  $J_2 = 16.7$  Hz, 1H), 4.16-4.32 (m, 2H), 4.64 (dd,  $J_1 = 4.2$  Hz,  $J_2 = 10.1$  Hz, 1H), 6.82-6.84 (m, 1H), 6.89-6.93 (m, 1H), 7.12-7.15 (m, 2H), 7.27-7.31 (m, 1H); 7.35-7.39 (m, 2H), 7.93-7.96 (m, 2H);  $^{13}\text{C}$  NMR ( $\text{CDCl}_3$ , 101 MHz)  $\delta$  (ppm): 14.18, 49.23, 53.17, 55.93, 58.66, 60.80, 61.52, 69.49, 77.53, 110.92, 116.94, 120.17, 125.10, 127.44, 127.80, 128.23, 142.28, 143.06, 147.96, 171.84, 172.06; IR (KBr):  $\gamma$  3430, 3292, 2929, 1738, 1581, 1486, 1460, 1254, 1208, 1179, 1085, 1070, 1023, 993, 853, 740, 701  $\text{cm}^{-1}$ ; HRMS (Micromass GCT-MS EI) exact mass calcd for  $(\text{C}_{23}\text{H}_{25}\text{NO}_6)^+$  requires m/z 411.1682, found m/z 411.1676; Enantiomeric excess: 70%, determined by HPLC (Daicel Chirapak AD-H, hexane/ isopropanol = 97: 3, flow rate 1.0 mL/min):  $T_R = 30.68$  min (major),  $T_R = 56.82$  min (minor).

**(2S,3S,3aS,9bS)-3-Ethyl-2-methyl-6-ethoxy-2-phenyl-1,2,3,3a,4,9b-hexahydrochromeno[4,3-b]**

**pyrrole-2,3-dicarboxylate (5e).** 64.4 mg (Flash column chromatography eluent, petroleum ether / ethyl acetate = 10: 1), 76% yield; colorless oil;  $[\alpha]_D^{20} = -9.85^\circ$  ( $c = 0.088$ , EtOAc);  $^1\text{H-NMR}$  ( $\text{CDCl}_3$ , 400 MHz)  $\delta$  (ppm): 1.34 (t,  $J = 7.1$  Hz, 3H), 1.45 (t,  $J = 7.0$  Hz, 3H), 2.54-2.64 (m, 1H), 3.21 (d,  $J = 11.6$  Hz, 1H), 3.30 (s, 1H), 3.62 (s, 3H), 3.66 (bs, 1H), 4.06-4.16 (m, 3H), 4.18-4.31 (m, 2H), 4.64 (dd,  $J_1 = 4.2$  Hz,  $J_2 = 10.1$  Hz, 1H), 6.81-6.90 (m, 2H), 7.11-7.14 (m, 1H), 7.27-7.31 (m, 1H), 7.35-7.39 (m, 2H), 7.93-7.96 (m, 2H);  $^{13}\text{C NMR}$  ( $\text{CDCl}_3$ , 101 MHz)  $\delta$  (ppm): 14.20, 14.82, 49.25, 53.16, 58.77, 60.84, 61.51, 64.33, 69.44, 77.56, 112.38, 116.92, 120.10, 125.22, 127.45, 127.79, 128.23, 142.58, 143.10, 147.24, 171.84, 172.09; IR (KBr):  $\gamma$  3434, 3292, 2977, 1739, 1716, 1579, 1457, 1335, 1250, 1183, 1087, 1063, 984, 850, 754, 725, 702  $\text{cm}^{-1}$ ; HRMS (Micromass GCT-MS EI) exact mass calcd for  $(\text{C}_{24}\text{H}_{27}\text{NO}_6)^+$  requires  $m/z$  425.1838, found  $m/z$  425.1843; Enantiomeric excess: 78%, determined by HPLC (Daicel Chirapak AD-H, hexane/ isopropanol = 90: 10, flow rate 1.0 mL/min):  $T_R = 10.50$  min (major),  $T_R = 12.84$  min (minor).

**(2S,3S,3aS,9bS)-3-Ethyl-2-methyl-6-fluoro-2-phenyl-1,2,3,3a,4,9b-hexahydrochromeno[4,3-b]**

**pyrrole-2,3-dicarboxylate (5f).** 50.6 mg (Flash column chromatography eluent, petroleum ether / ethyl acetate = 10: 1), 63% yield; white solid; mp: 89-91  $^\circ\text{C}$ ;  $[\alpha]_D^{20} = -9.06^\circ$  ( $c = 0.114$ , EtOAc);  $^1\text{H-NMR}$  ( $\text{CDCl}_3$ , 400 MHz)  $\delta$  (ppm): 1.35 (t,  $J = 7.1$  Hz, 3H), 2.53-2.63 (m, 1H), 3.23 (d,  $J = 11.6$  Hz, 1H), 3.32 (s, 1H), 3.63 (s, 3H), 3.68 (bs, 1H), 4.12 (dd,  $J_1 = 10.2$  Hz,  $J_2 = 11.7$  Hz, 1H), 4.18-4.33 (m, 2H), 4.62 (dd,  $J_1 = 4.3$  Hz,  $J_2 = 10.2$  Hz, 1H), 6.84-6.89 (m, 1H), 6.97-7.02 (m, 1H), 7.26-7.29 (m, 1H), 7.30-7.32 (m, 1H); 7.35-7.40 (m, 2H), 7.92-7.95 (m, 2H);  $^{13}\text{C NMR}$  ( $\text{CDCl}_3$ , 101 MHz)  $\delta$  (ppm): 14.19, 49.11, 53.24, 58.37 (d,  $J = 3.1$  Hz), 60.59, 61.62, 69.53, 77.45, 115.45 (d,  $J = 18.1$  Hz), 120.00, 120.02 (d,  $J = 3.3$  Hz), 126.86 (d,  $J = 1.6$  Hz), 127.40, 127.89, 128.28, 141.24 (d,  $J = 10.2$  Hz), 142.85, 151.25 (d,  $J = 243.6$  Hz), 171.76, 171.96; IR (KBr):  $\gamma$  3305, 2956, 2844, 1737, 1579, 1480, 1468, 1430, 1382, 1334, 1274, 1255, 1172, 1068, 983, 848, 785, 739, 698  $\text{cm}^{-1}$ ; HRMS (Micromass GCT-MS EI) exact mass calcd for  $(\text{C}_{22}\text{H}_{22}\text{FNO}_5)^+$  requires  $m/z$  399.1482, found  $m/z$  399.1485; Enantiomeric excess: 68%, determined by HPLC (Daicel Chirapak OD-H, hexane/ isopropanol = 95: 5, flow rate 1.0 mL/min):  $T_R = 8.97$  min (minor),  $T_R = 36.44$  min (major).

**(2S,3S,3aS,9bS)-Dimethyl-2-phenyl-1,2,3,3a,4,9b-hexahydrochromeno[4,3-b]pyrrole-2,3-dicar**

**boxylate (5g).** 46 mg (Flash column chromatography eluent, petroleum ether / ethyl acetate = 10: 1), 84% yield; white solid; mp: 124-126  $^\circ\text{C}$ ;  $[\alpha]_D^{20} = -2.77^\circ$  ( $c = 0.108$ , EtOAc);  $^1\text{H-NMR}$  ( $\text{CDCl}_3$ , 400 MHz)  $\delta$  (ppm): 2.52-2.61 (m, 1H), 3.23 (d,  $J = 11.6$  Hz, 1H), 3.32 (s, 1H), 3.63 (s, 3H), 3.68 (bs, 1H), 3.80 (s, 3H), 4.05 (dd,  $J_1 = 10.2$  Hz,  $J_2 = 11.6$  Hz, 1H), 4.49 (dd,  $J_1 = 4.2$  Hz,  $J_2 = 10.1$  Hz, 1H),

6.81-6.83 (m, 1H), 6.91-6.95 (m, 1H), 7.15-7.19 (m, 1H), 7.28-7.32 (m, 1H), 7.36-7.40 (m, 2H), 7.48-7.50 (m, 1H), 7.93-7.96 (m, 2H);  $^{13}\text{C}$  NMR ( $\text{CDCl}_3$ , 101 MHz)  $\delta$  (ppm): 49.46, 52.52, 53.28, 58.79, 60.55, 68.90, 77.78, 116.10, 120.33, 124.36, 124.92, 127.42, 127.86, 128.28, 128.74, 142.99, 153.24, 171.79, 172.71; IR (KBr):  $\gamma$  3460, 3279, 2956, 1735, 1611, 1581, 1490, 1455, 1432, 1254, 1182, 1036, 989, 843, 761, 701  $\text{cm}^{-1}$ ; HRMS (Micromass GCT-MS EI) exact mass calcd for  $(\text{C}_{21}\text{H}_{21}\text{NO}_5)^+$  requires  $m/z$  367.1420, found  $m/z$  367.1416; Enantiomeric excess: 74%, determined by HPLC (Daicel Chirapak AD-H, hexane/ isopropanol = 90: 10, flow rate 1.0 mL/min):  $T_R$  = 9.89 min (major),  $T_R$  = 11.22 min (minor).

### References:

1. (a) Chen, X. H.; Wei, Q.; Luo, S. W.; Xiao, H.; Gong, L. Z. *J. Am. Chem. Soc.* **2009**, *131*, 13819. Other group had also been reported this catalyst, see: (b) Storer, R. I.; Carrera, D. E.; Ni, Y.; MacMillan, D.W. C. *J. Am. Chem. Soc.* **2006**, *128*, 84. (c) Reuping, M.; Sugiono, E.; Azap, C.; Theissmann, T.; Bolte, M. *Org. Lett.* **2005**, *7*, 3781. (d) Hoffman, S.; Seayad, A. M.; List, B. *Angew. Chem.Int. Ed.* **2005**, *44*, 7424.

### X-ray single crystal data for **3d** :

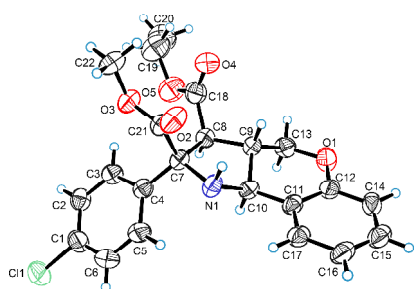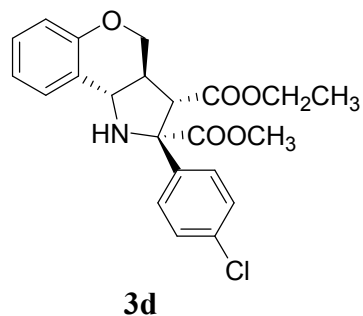

X-ray crystal structure of **3d** with ellipsoids set at 45% probability. Hydrogen atoms are omitted for clarity.

| Chemical formula           | C22 H22 Cl N O5 |
|----------------------------|-----------------|
| Formula weight             | 415.86          |
| Space group                | P 21            |
| Z                          | 2               |
| a, Å                       | 9.6104(10)      |
| b, Å                       | 6.8695(13)      |
| c, Å                       | 15.6735(17)     |
| $\alpha$ , °               | 90.00           |
| $\beta$ , °                | 92.706          |
| $\gamma$ , °               | 90.00           |
| V, Å <sup>3</sup>          | 1033.6(2)       |
| T, K                       | 291             |
| $\rho$ , g/cm <sup>3</sup> | 1.336           |

CCDC number: 759560

### Selected NMR and HPLC spectra

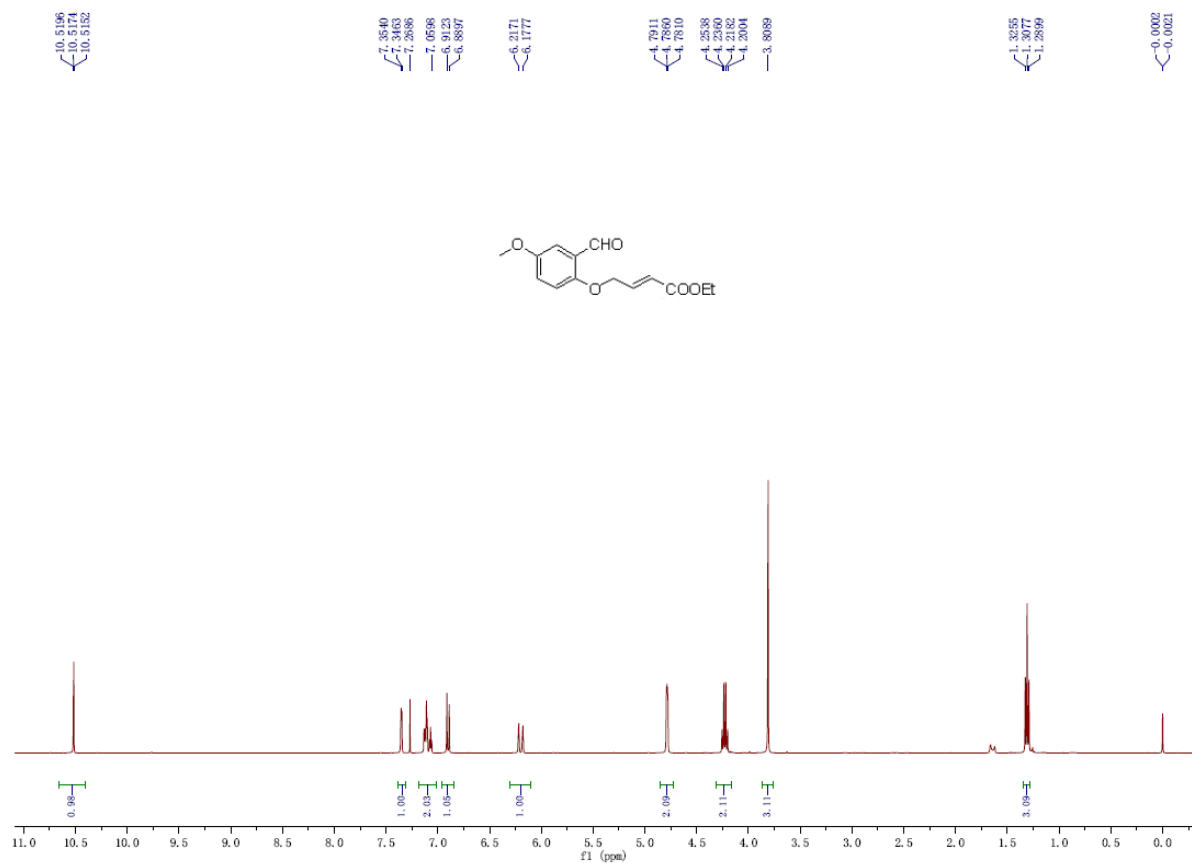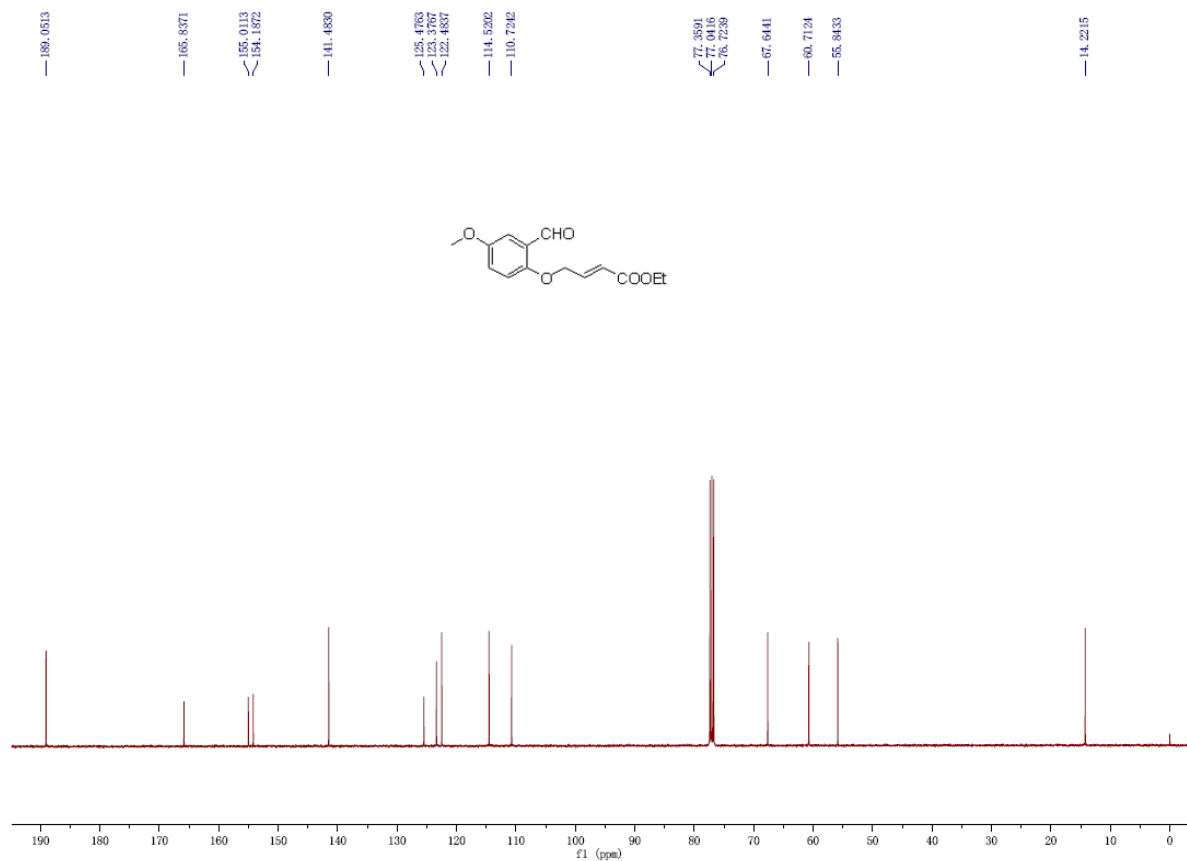

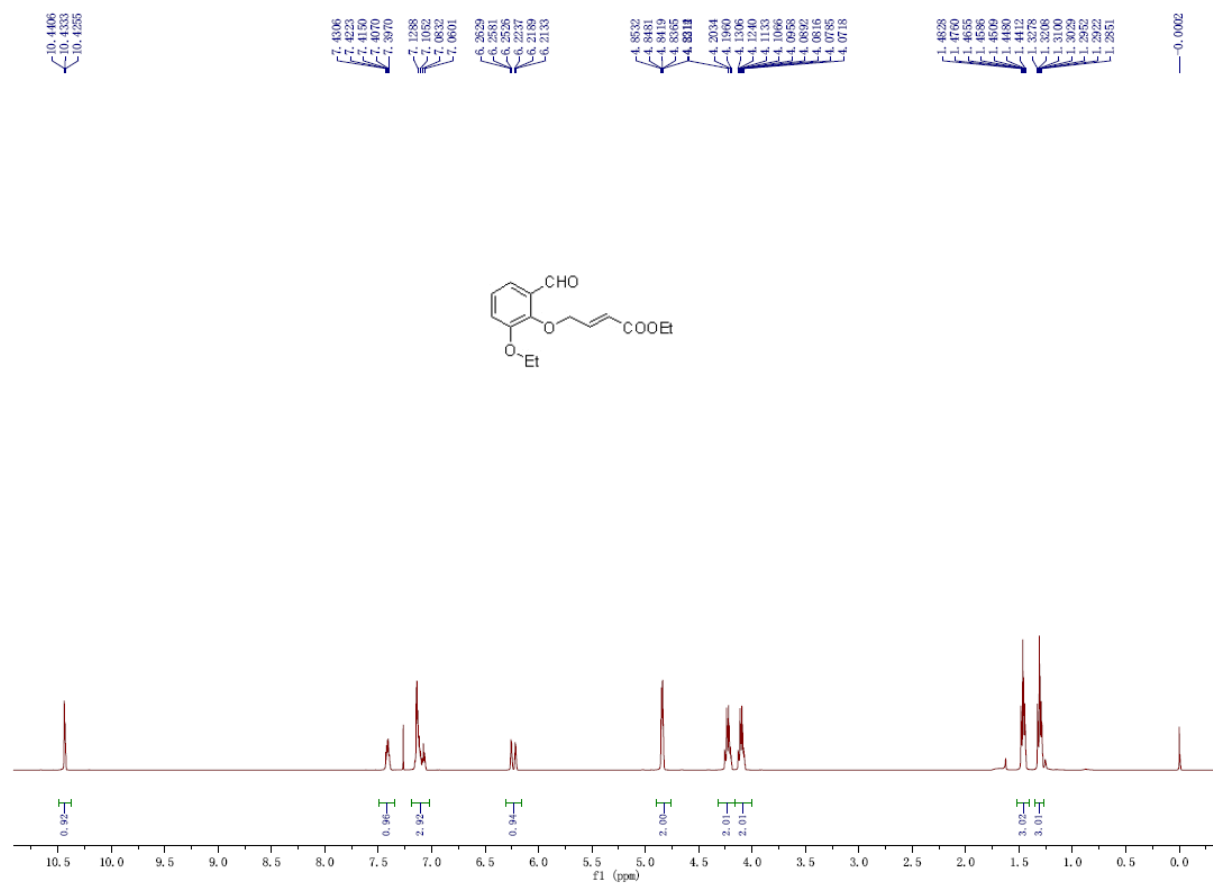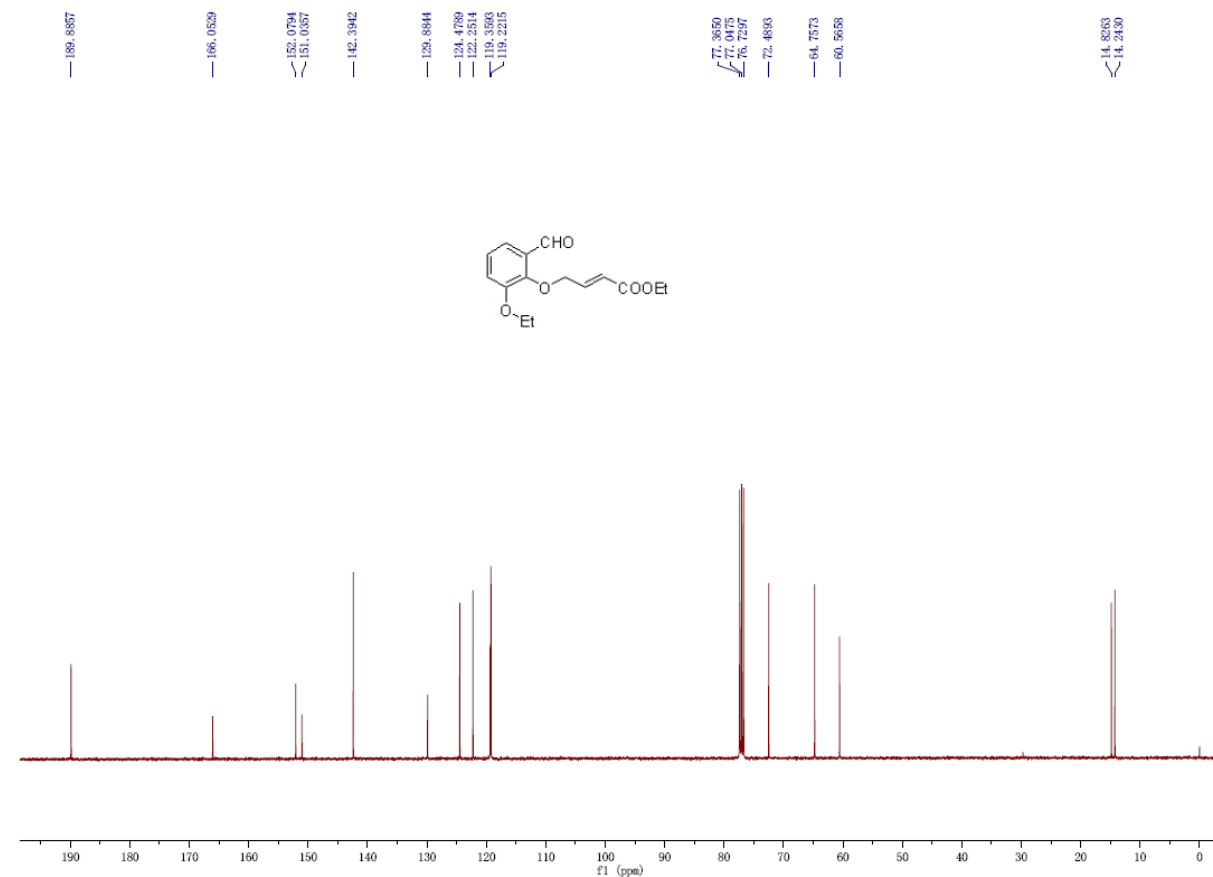

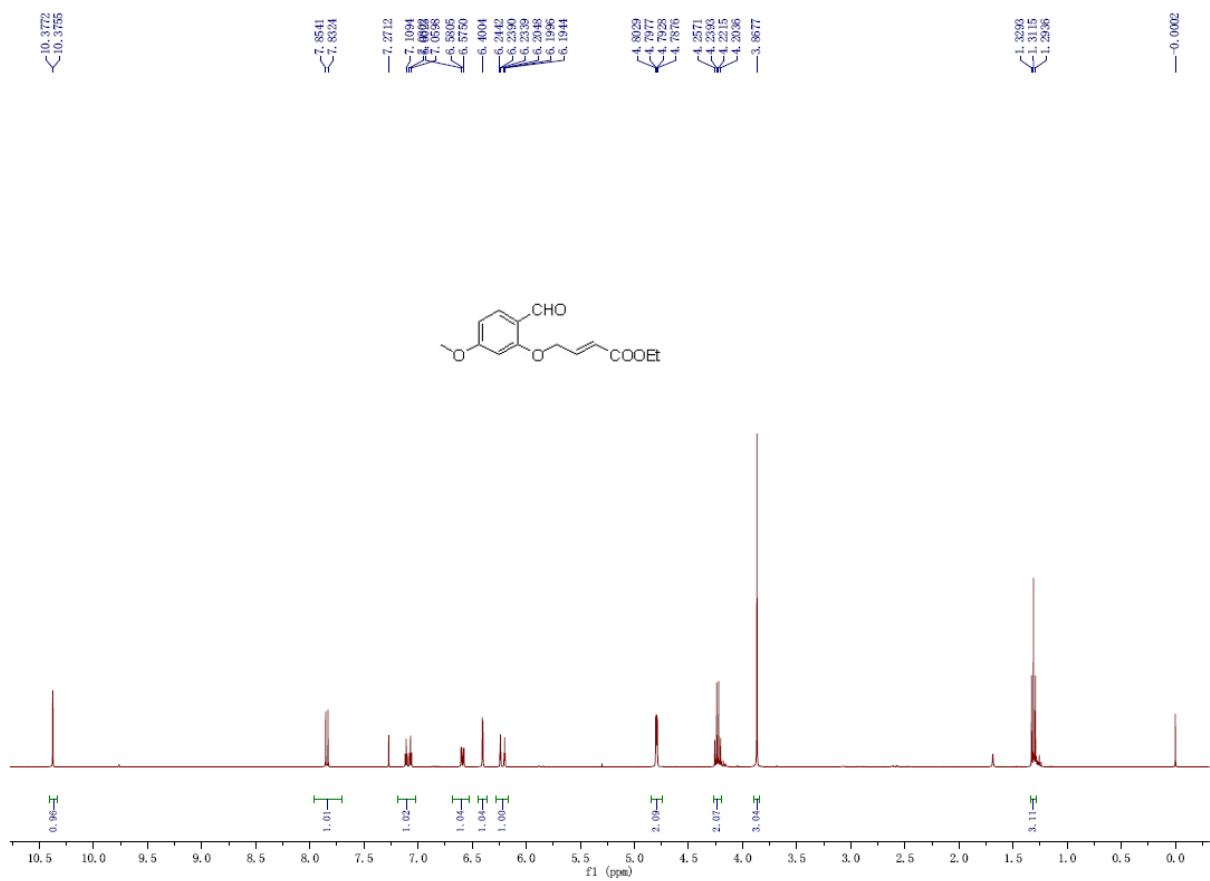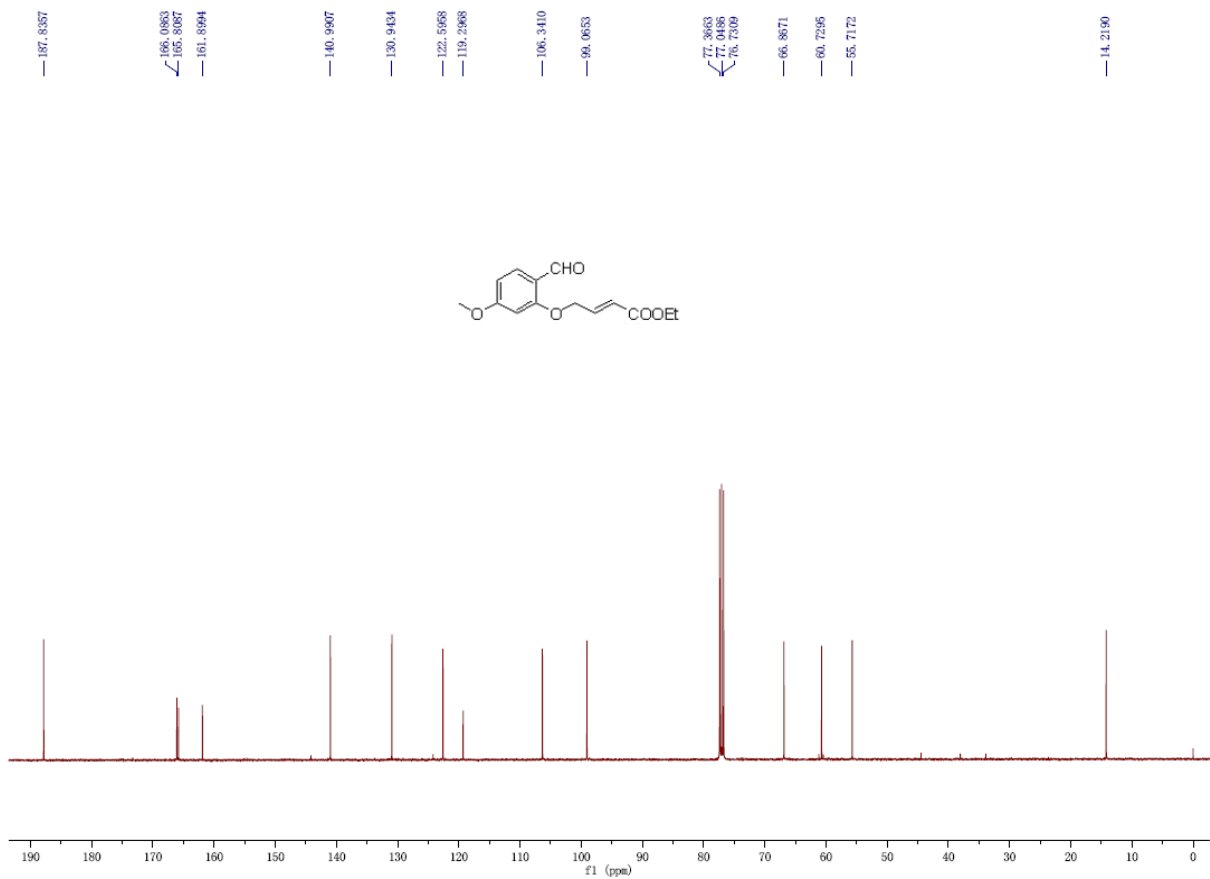

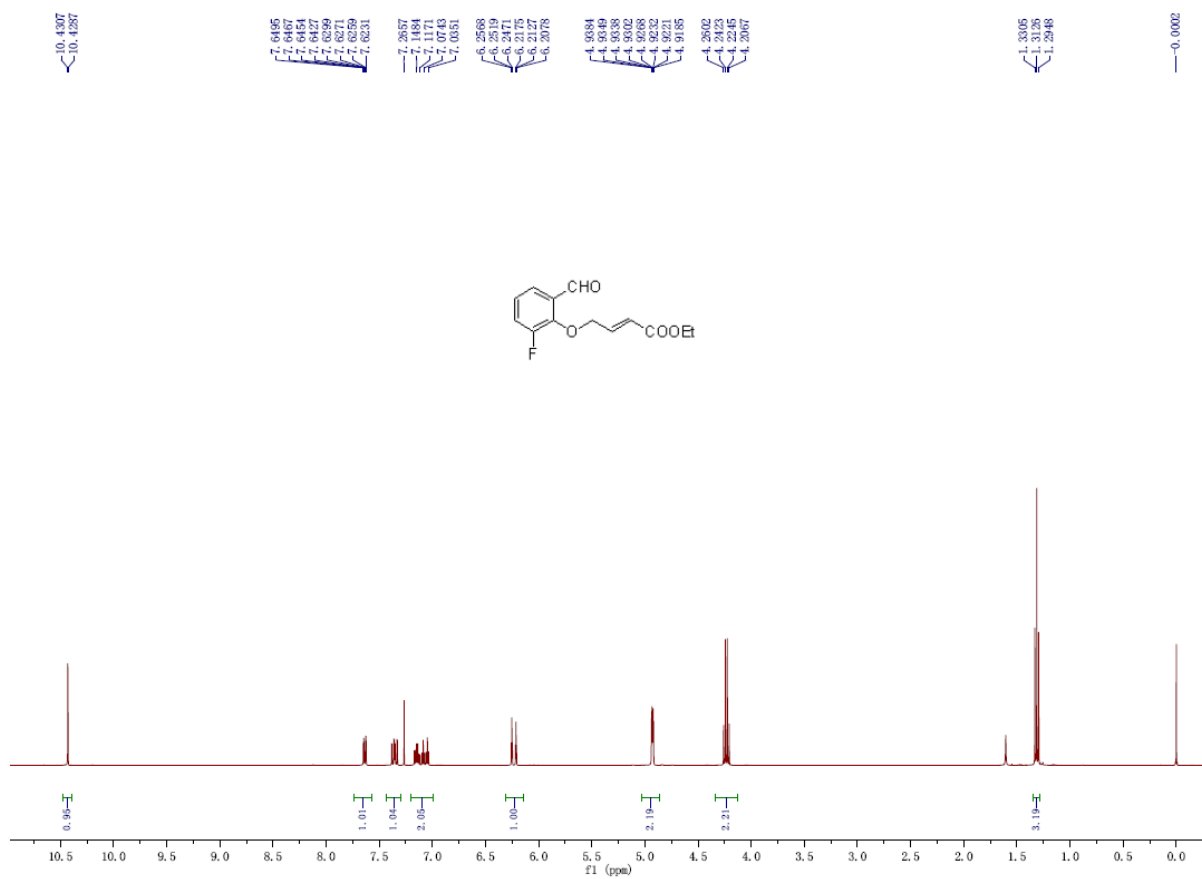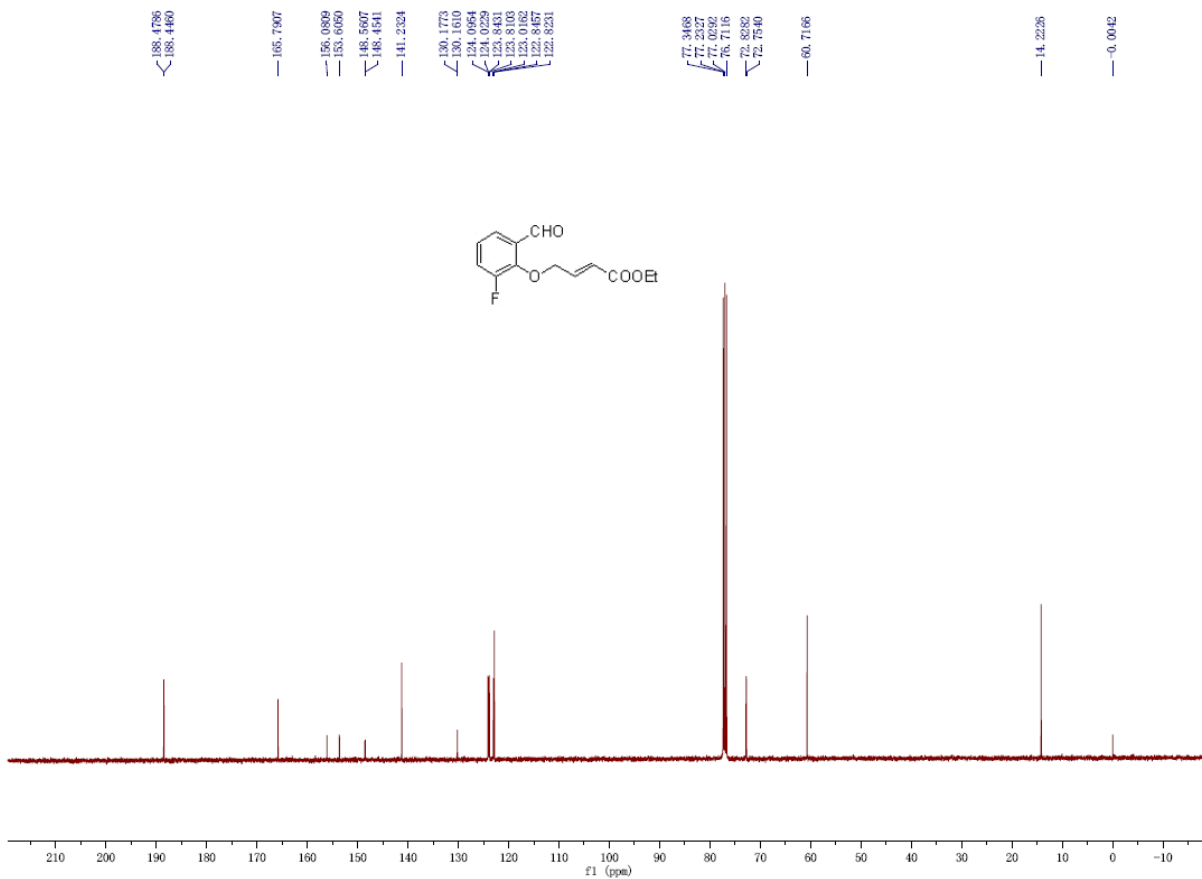



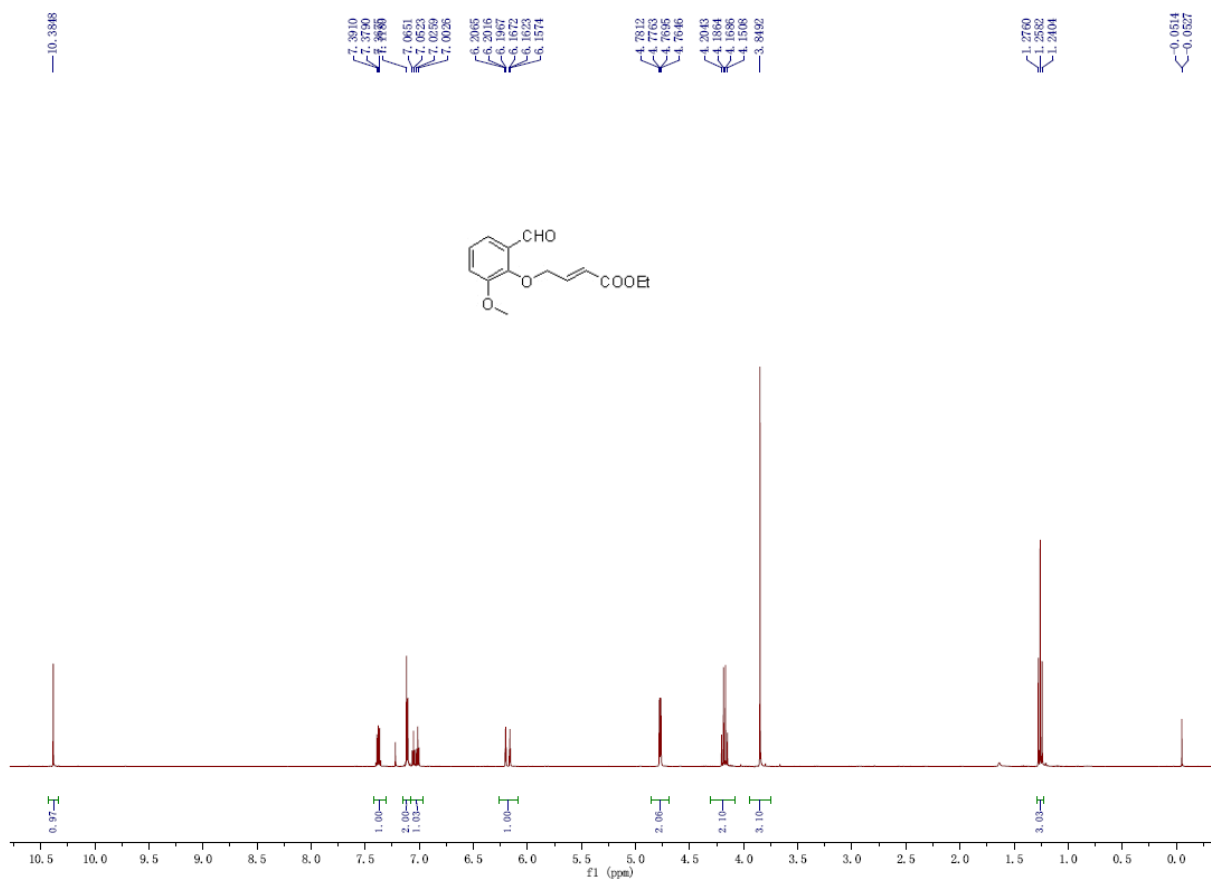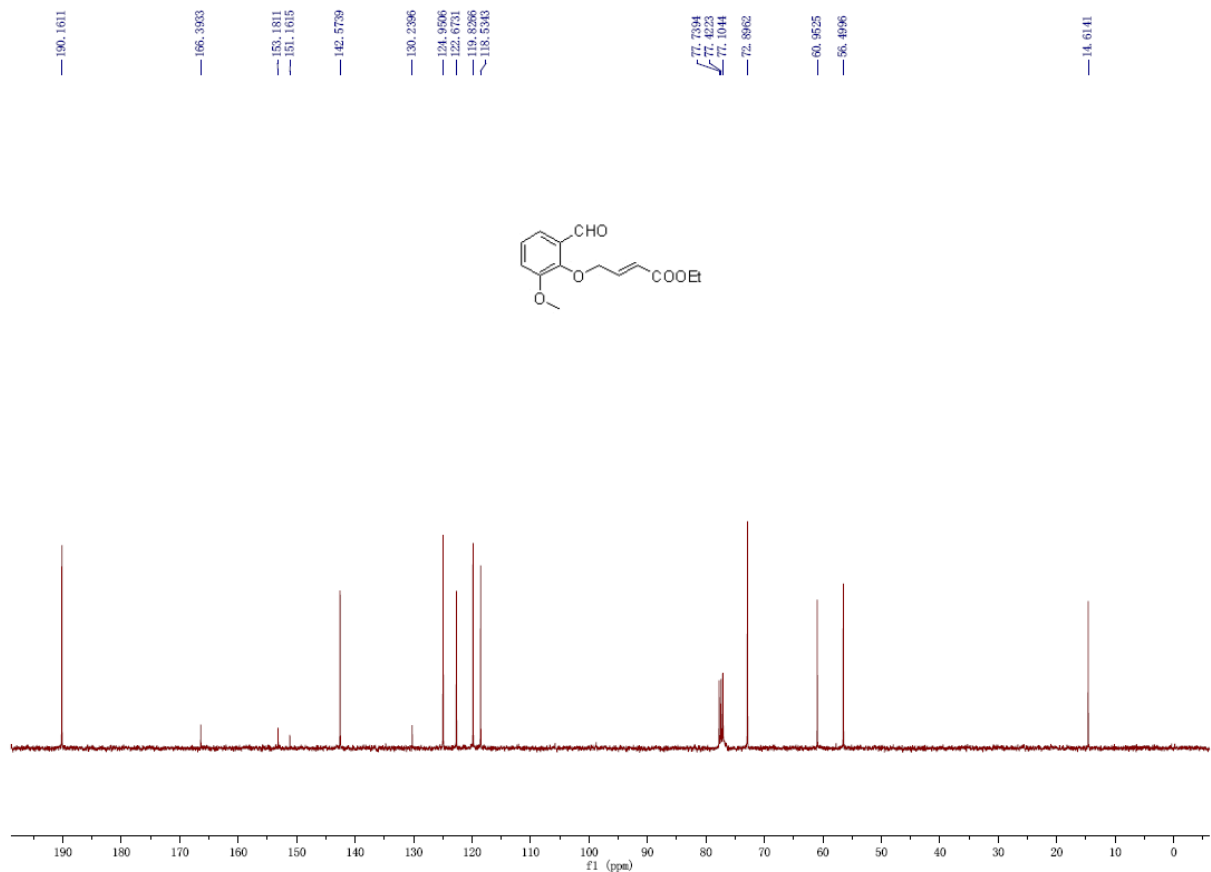

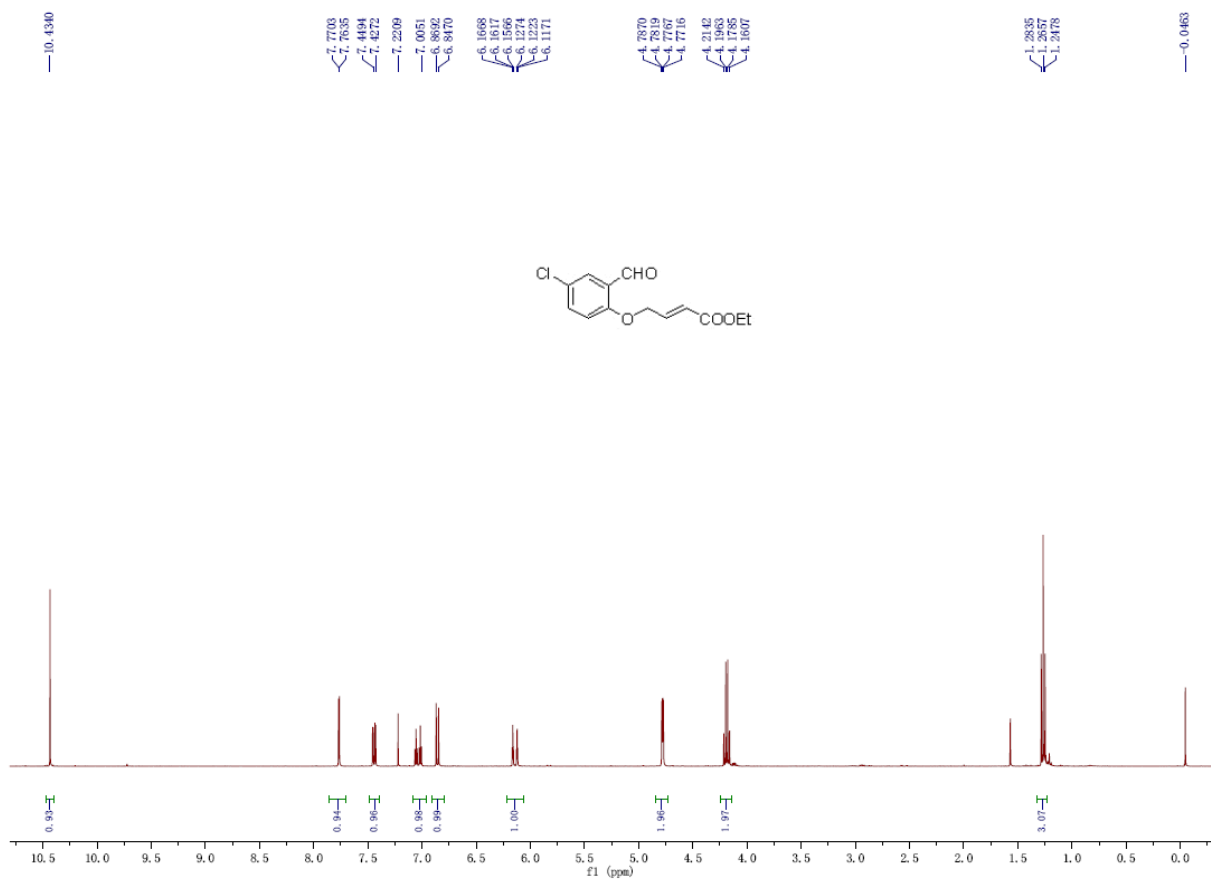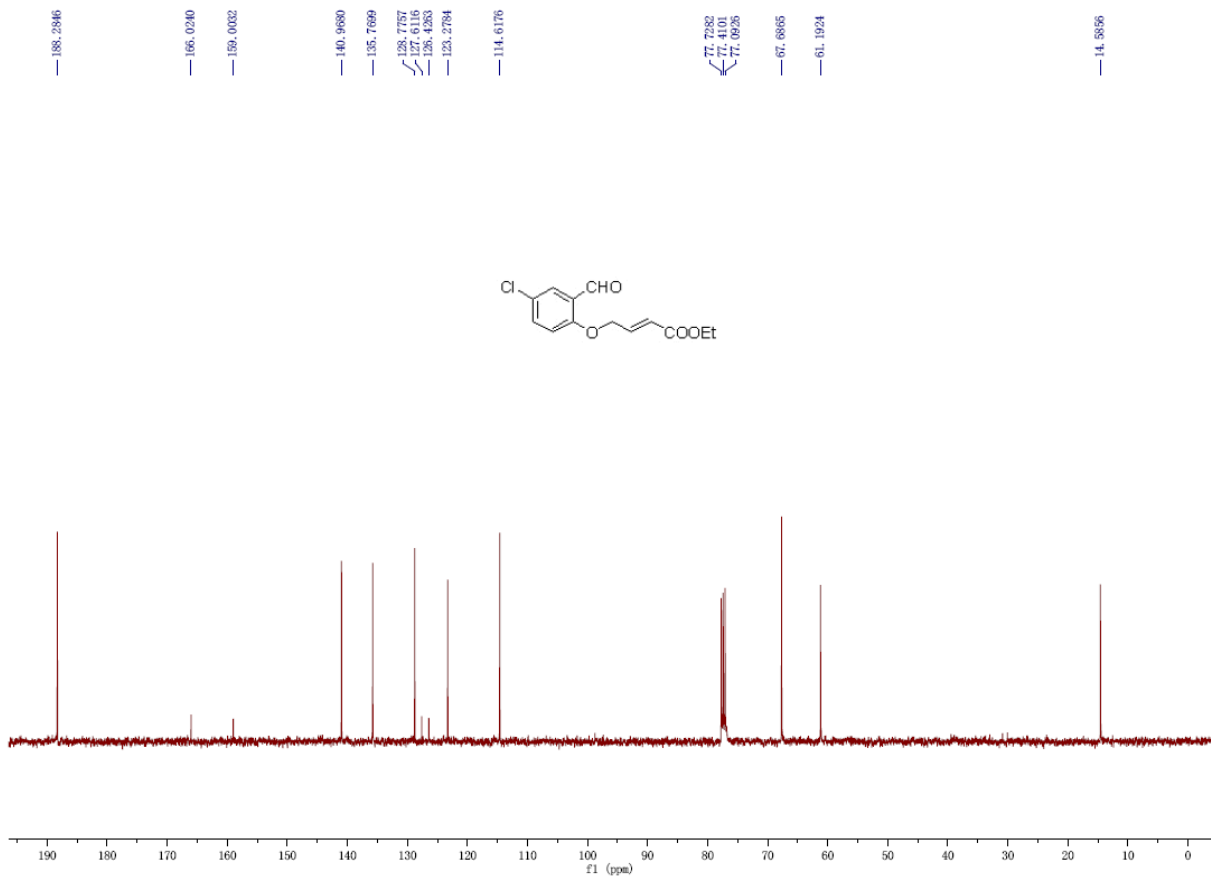

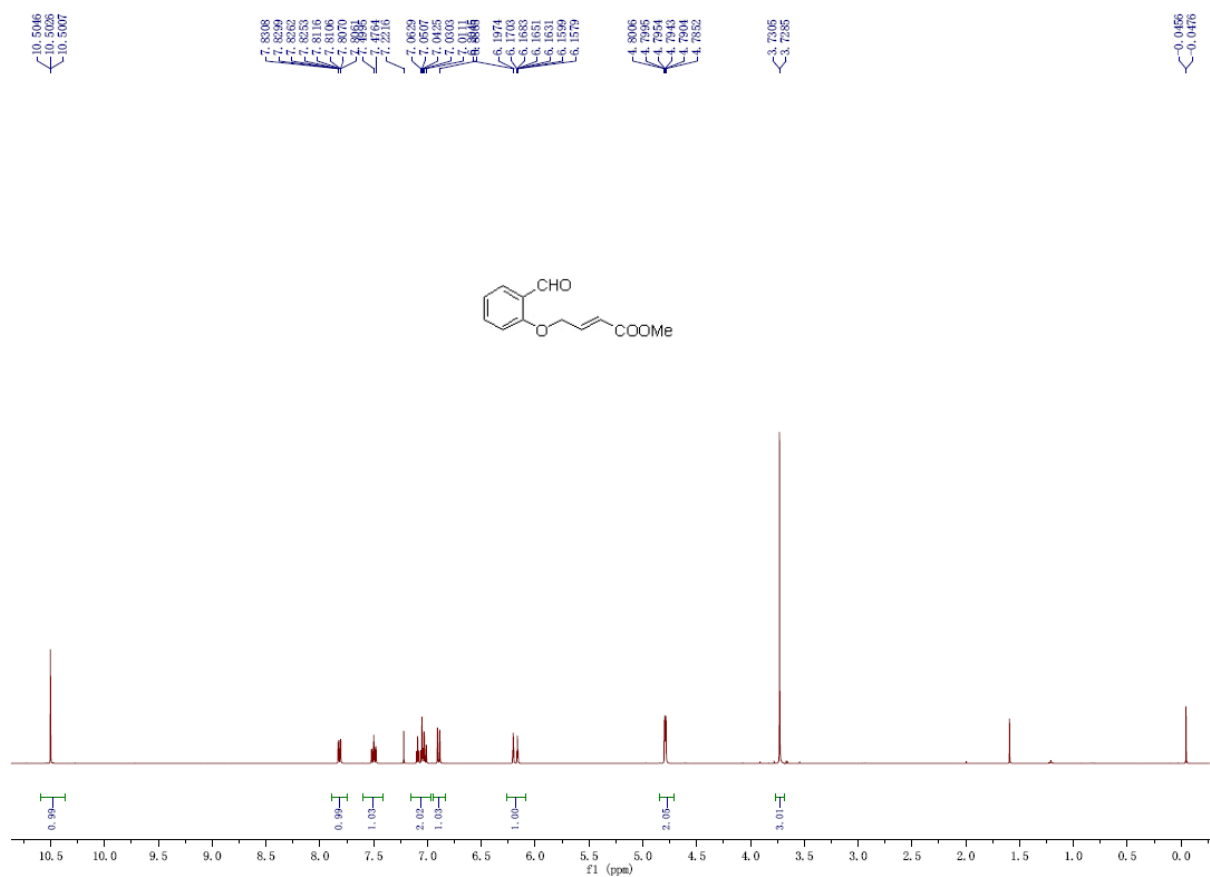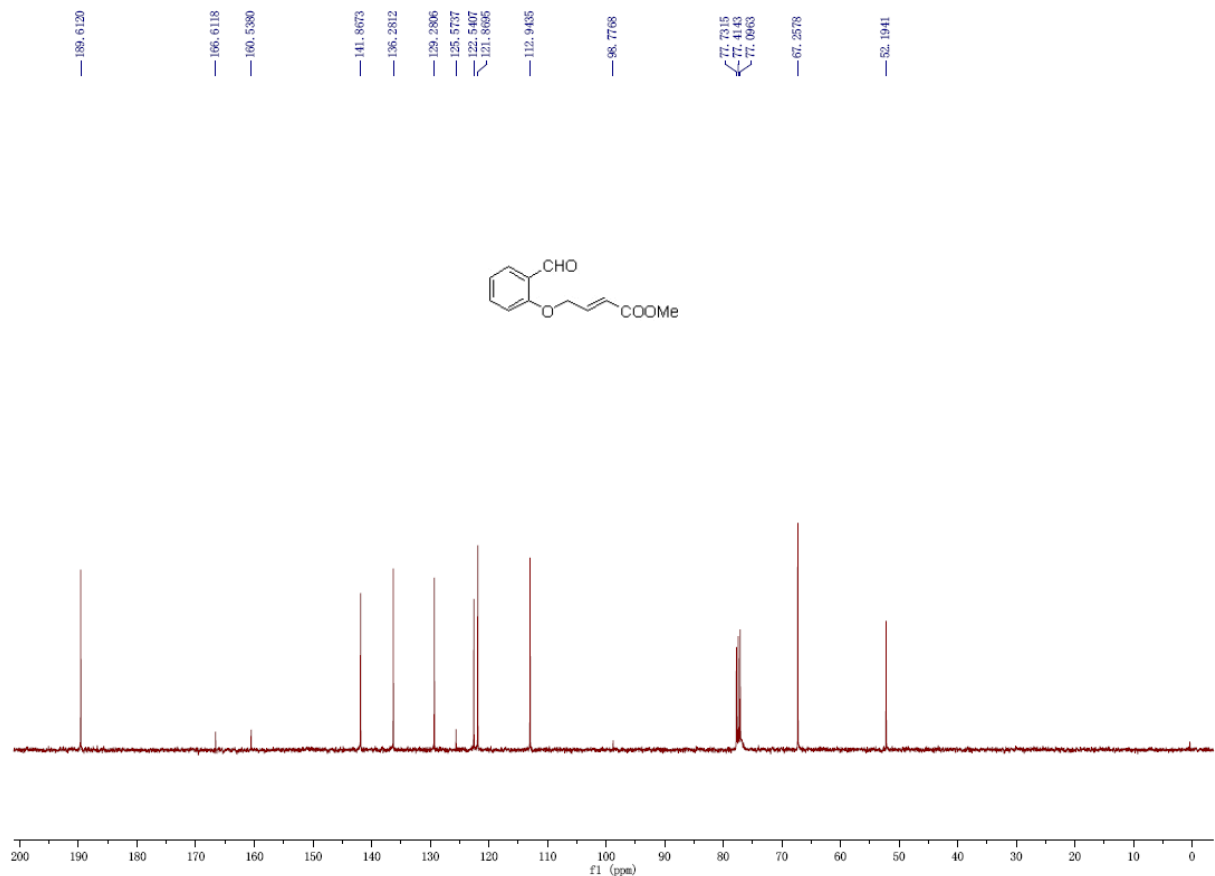

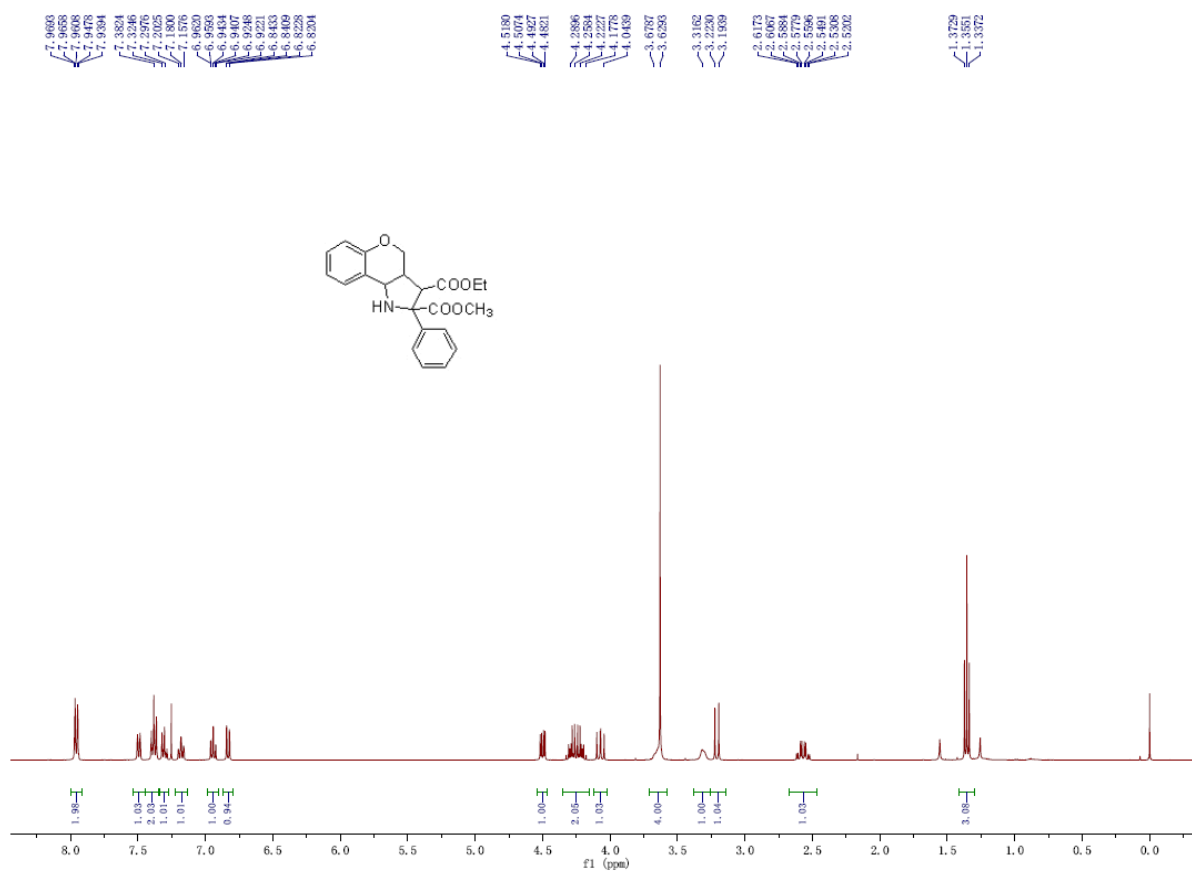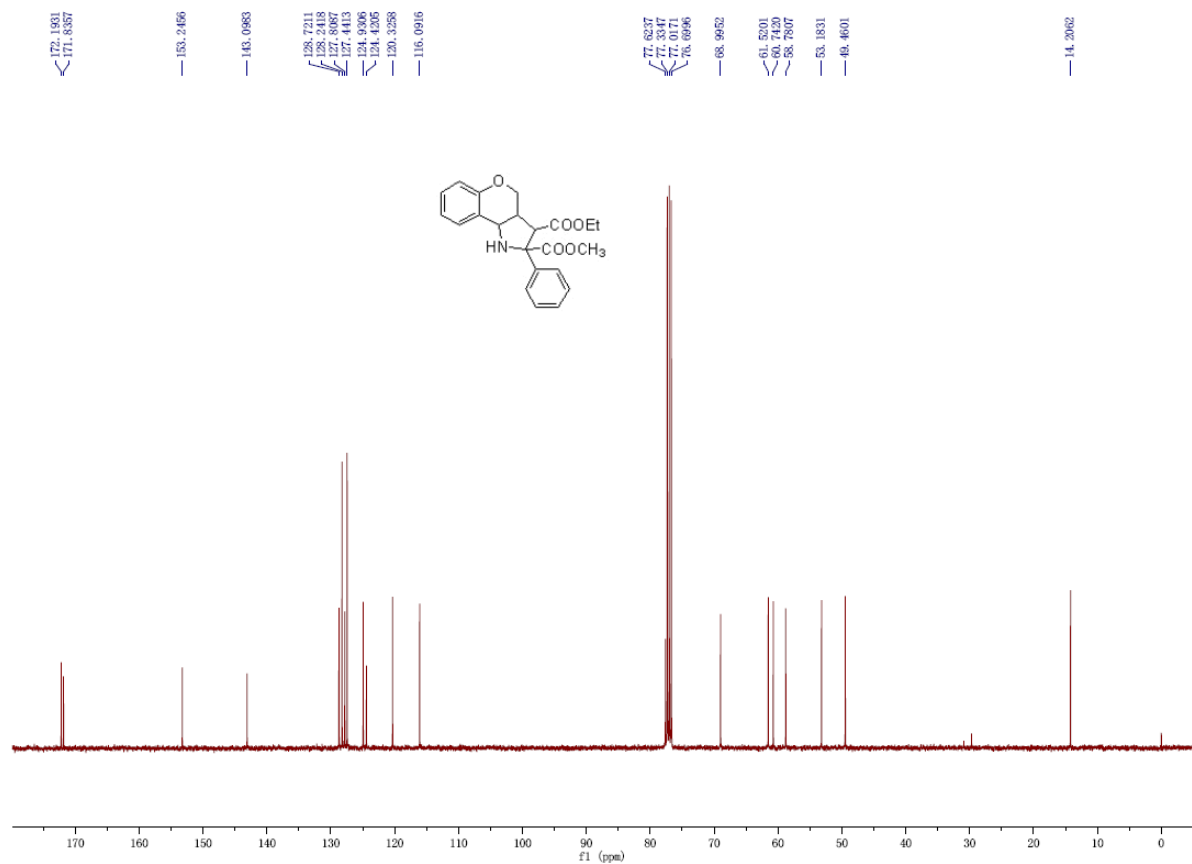

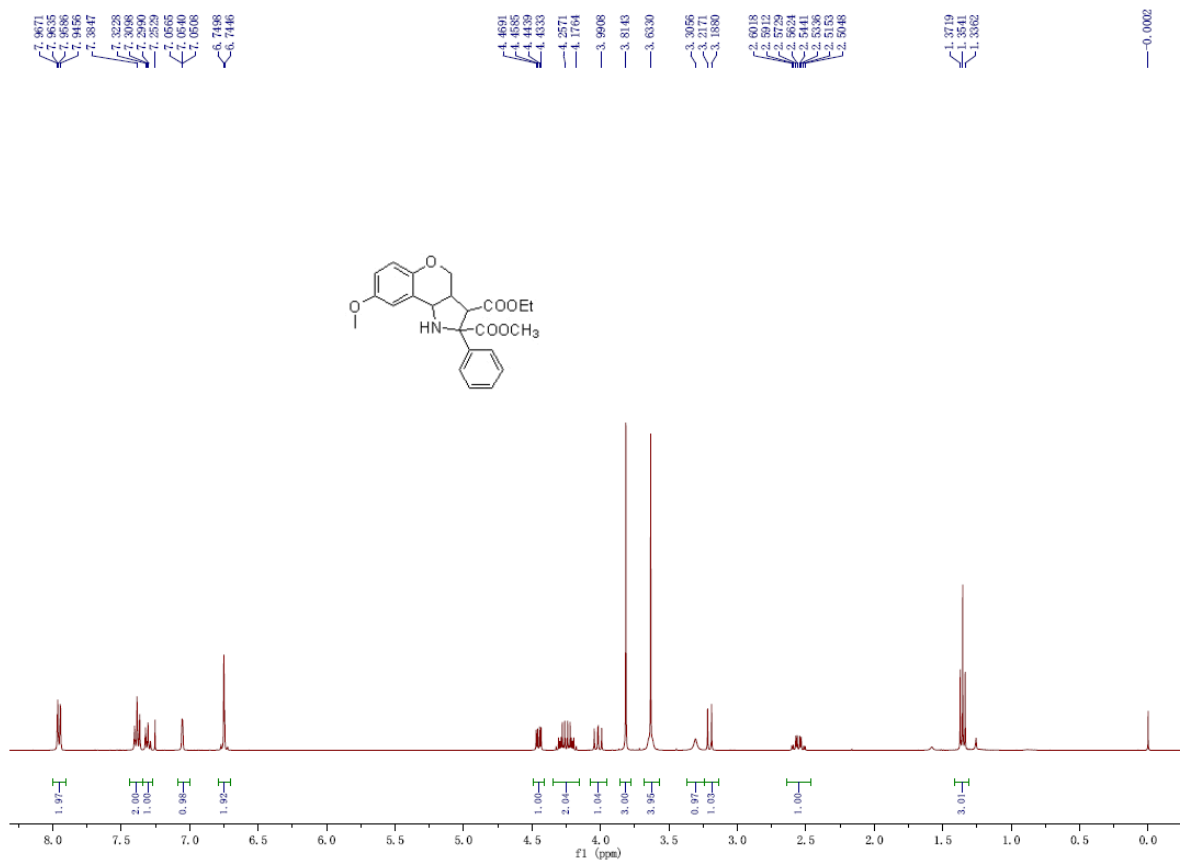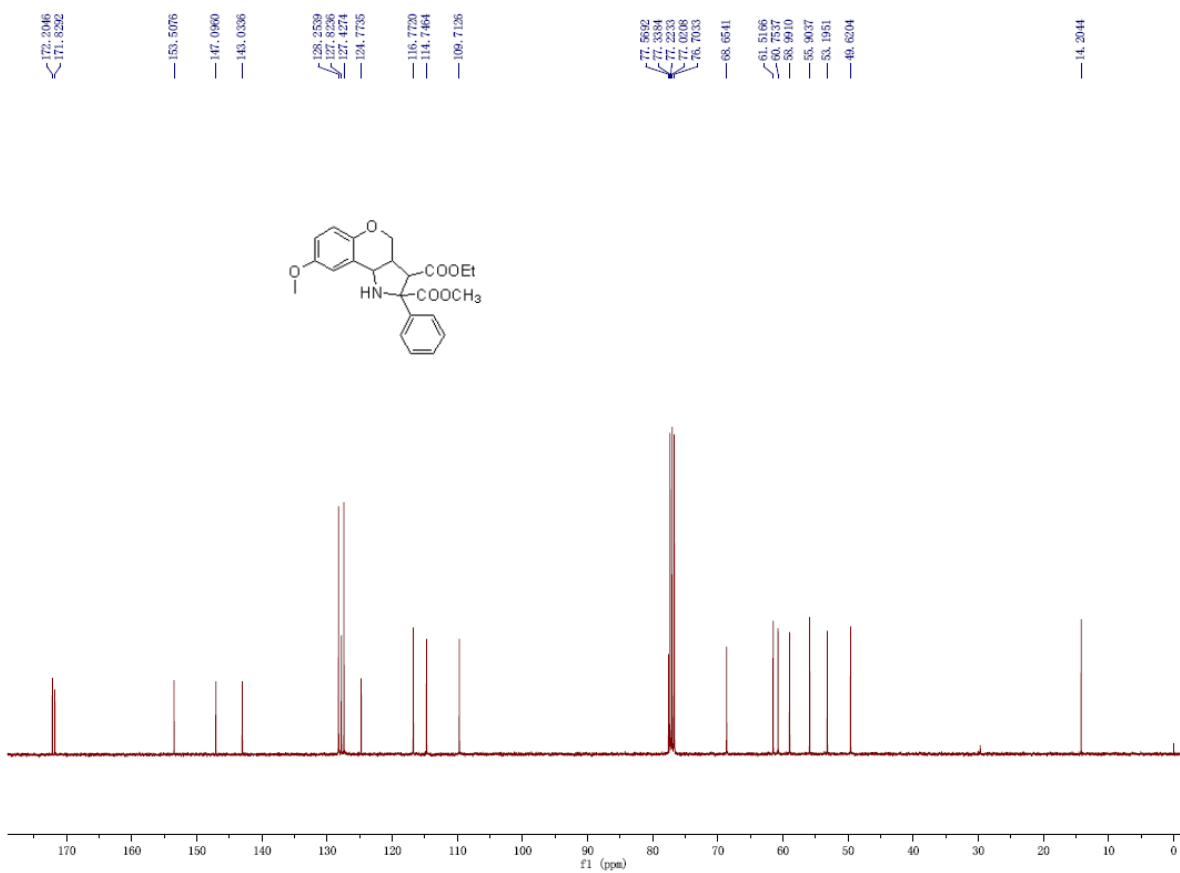

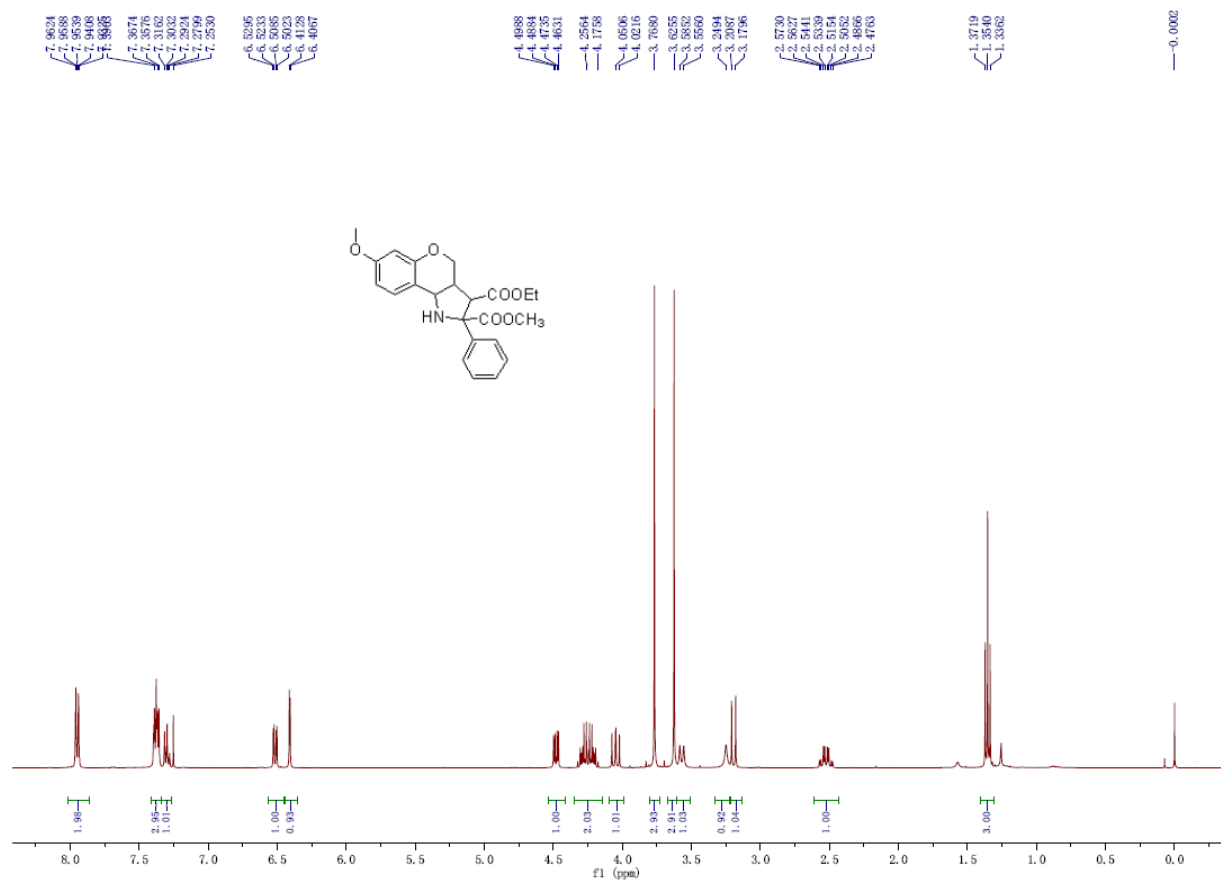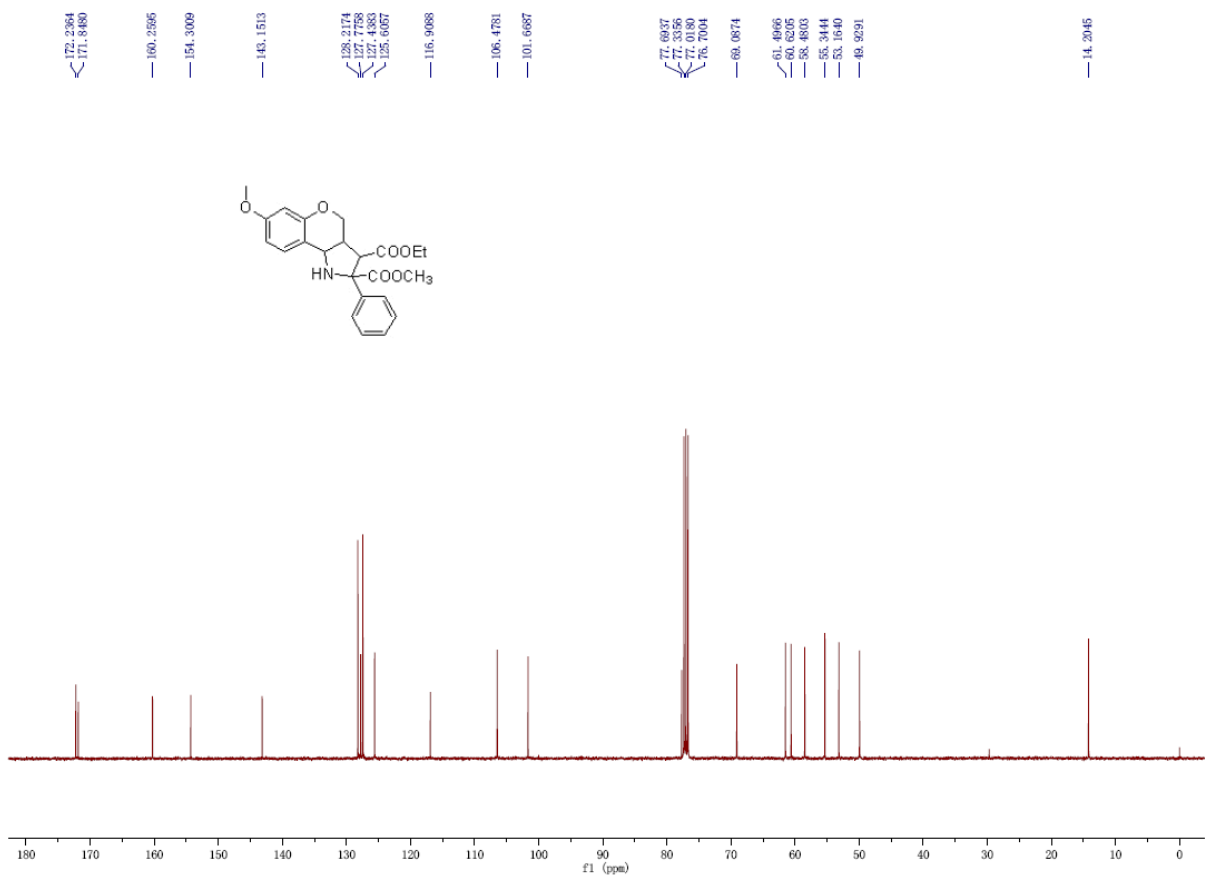

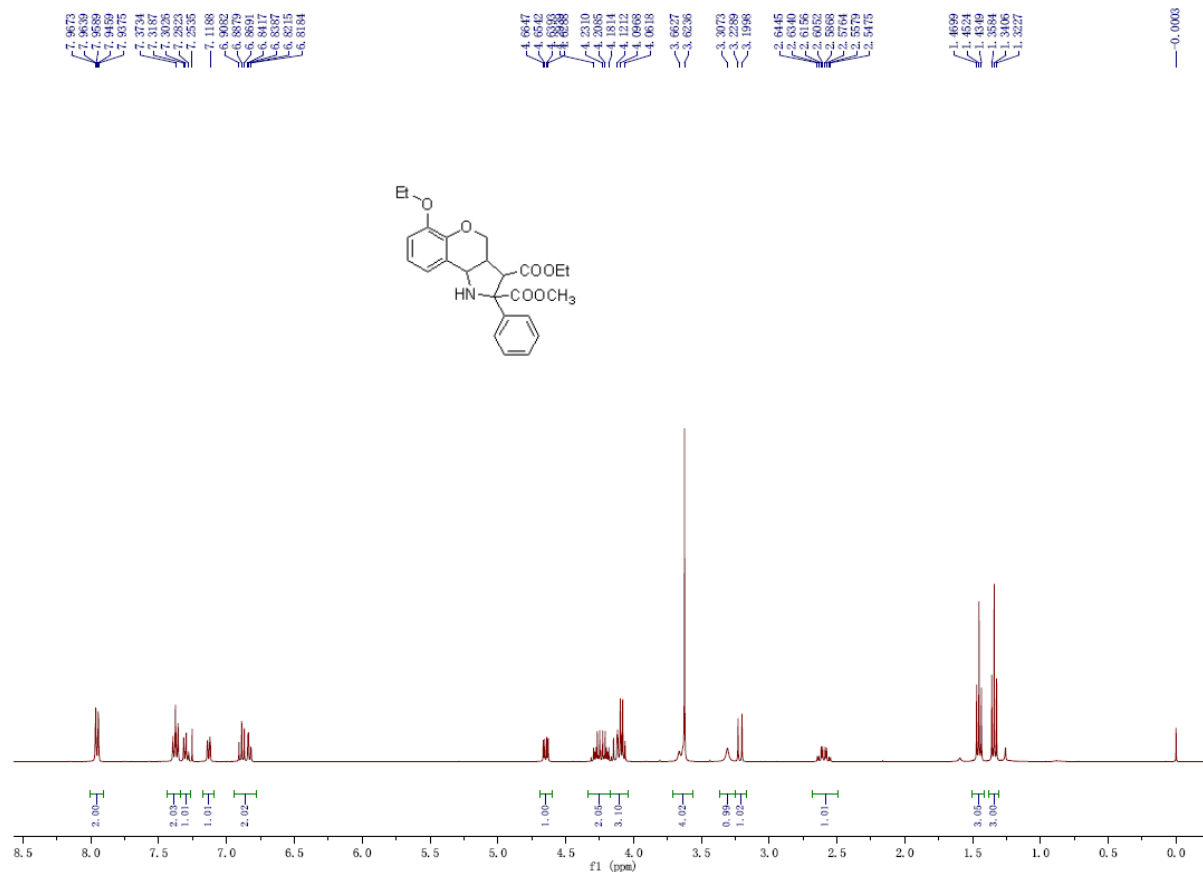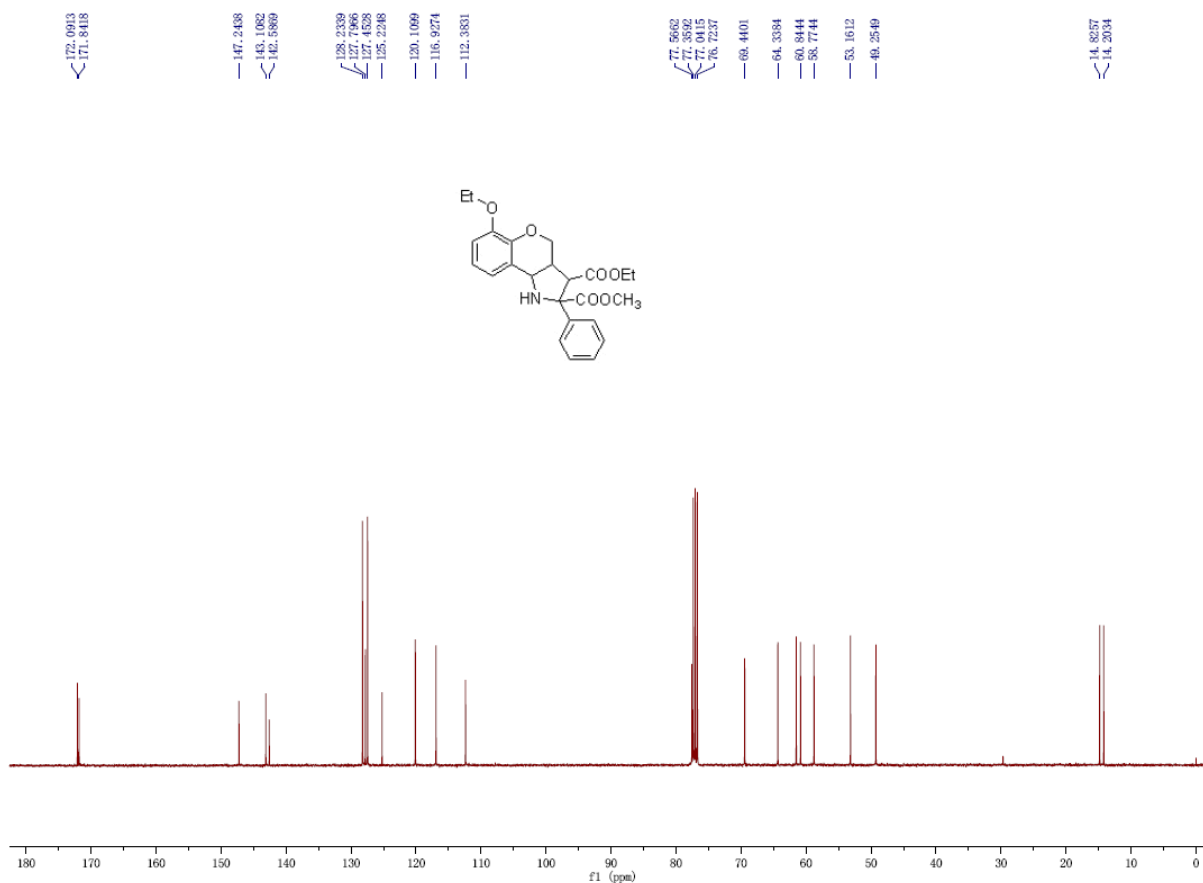

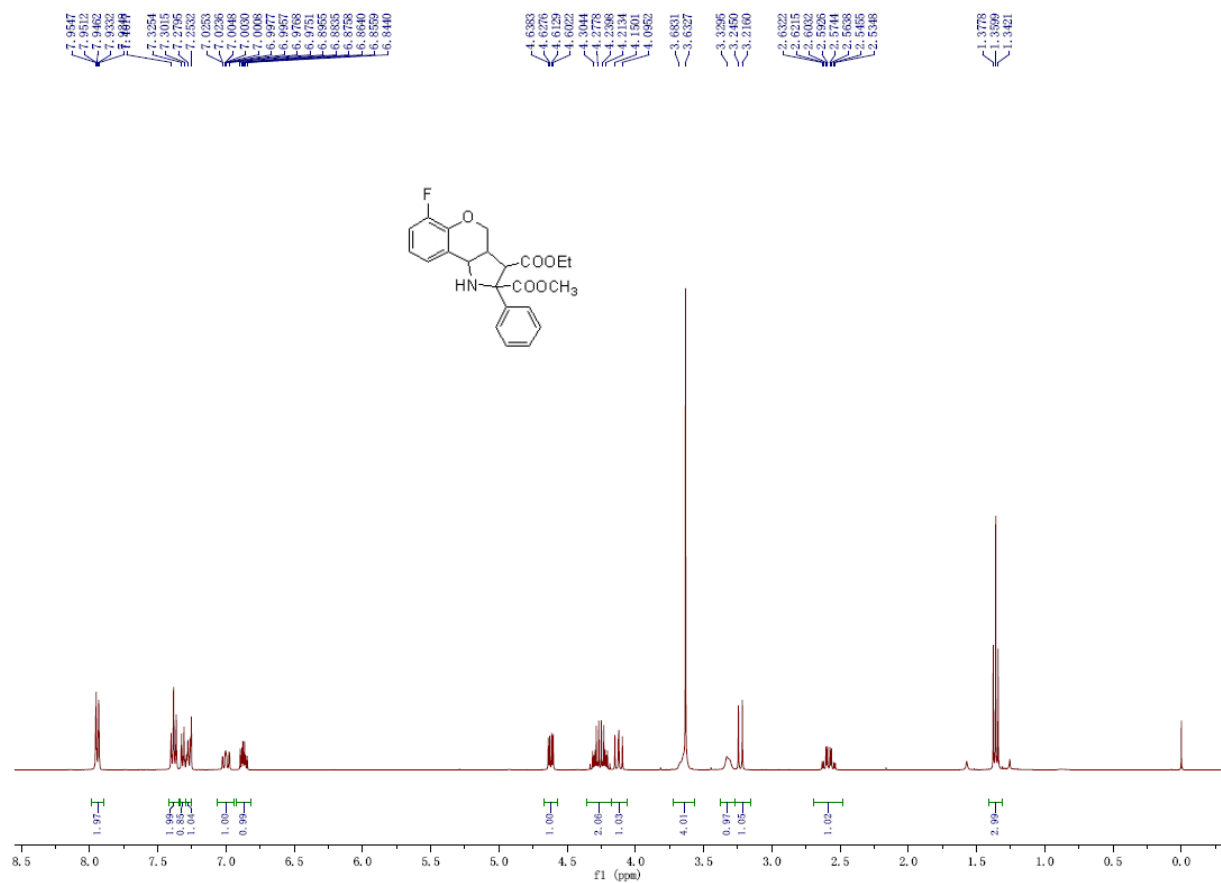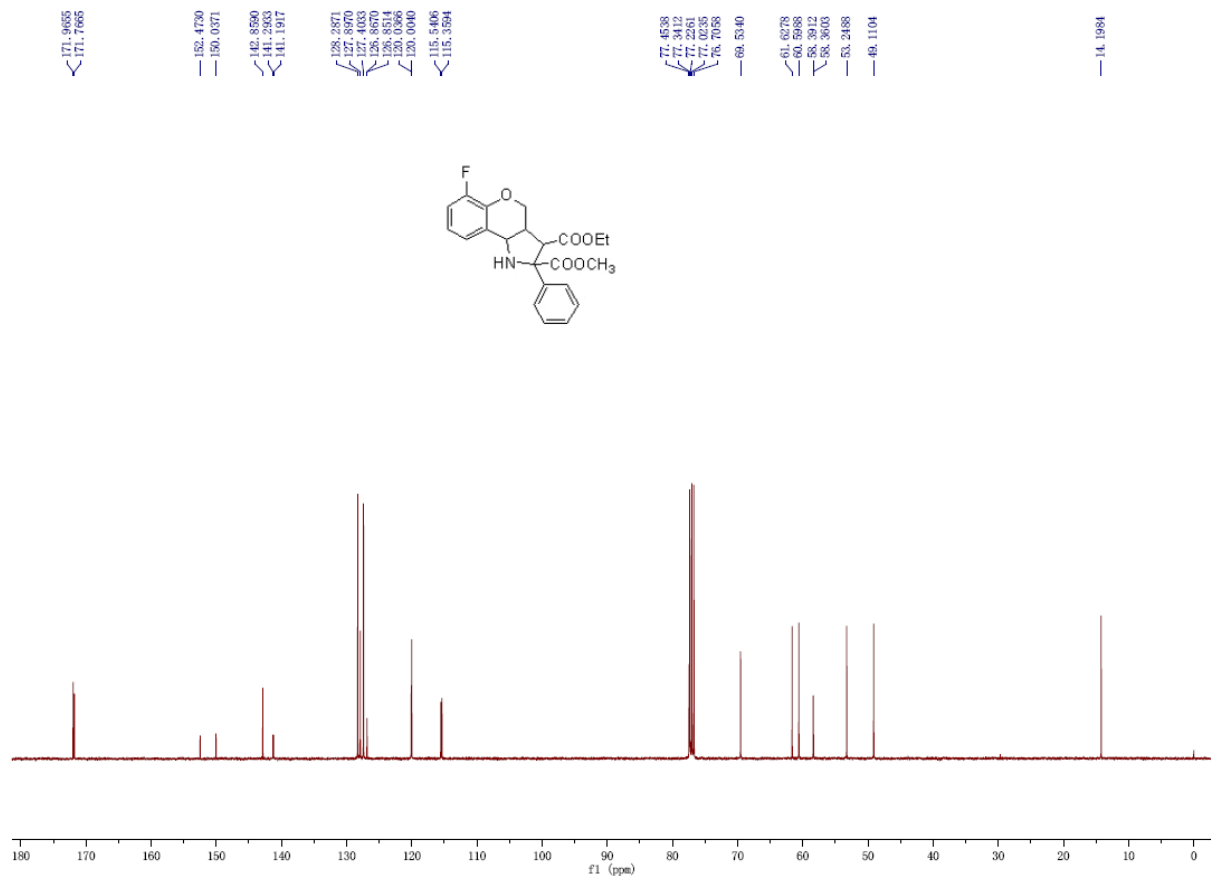



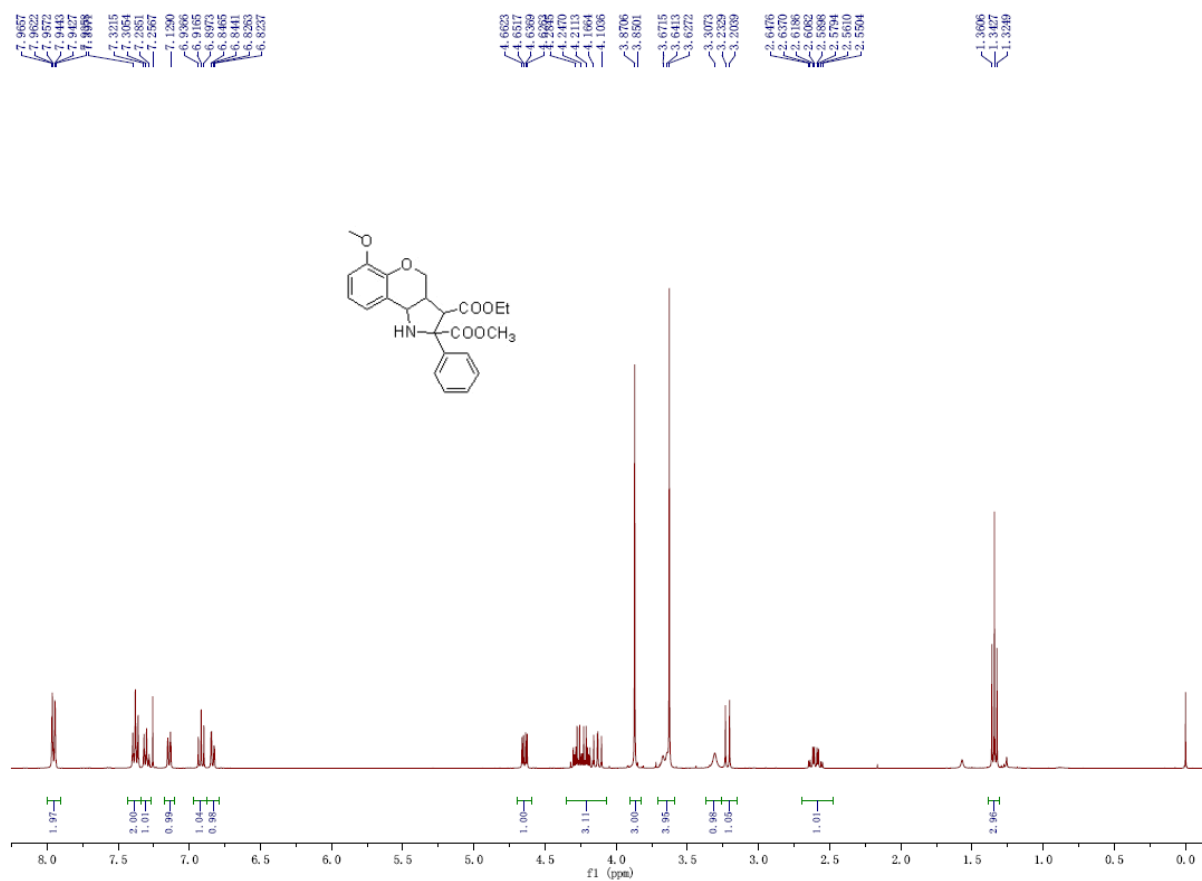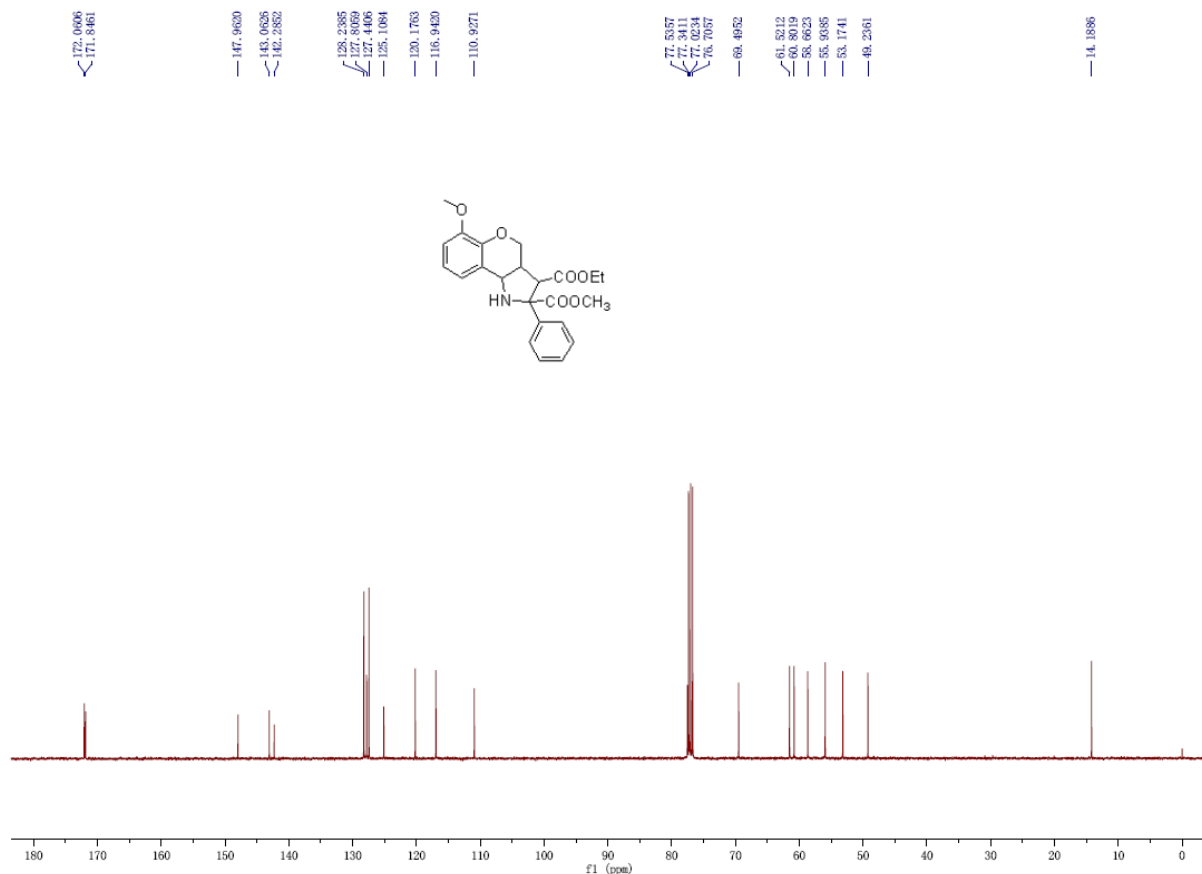

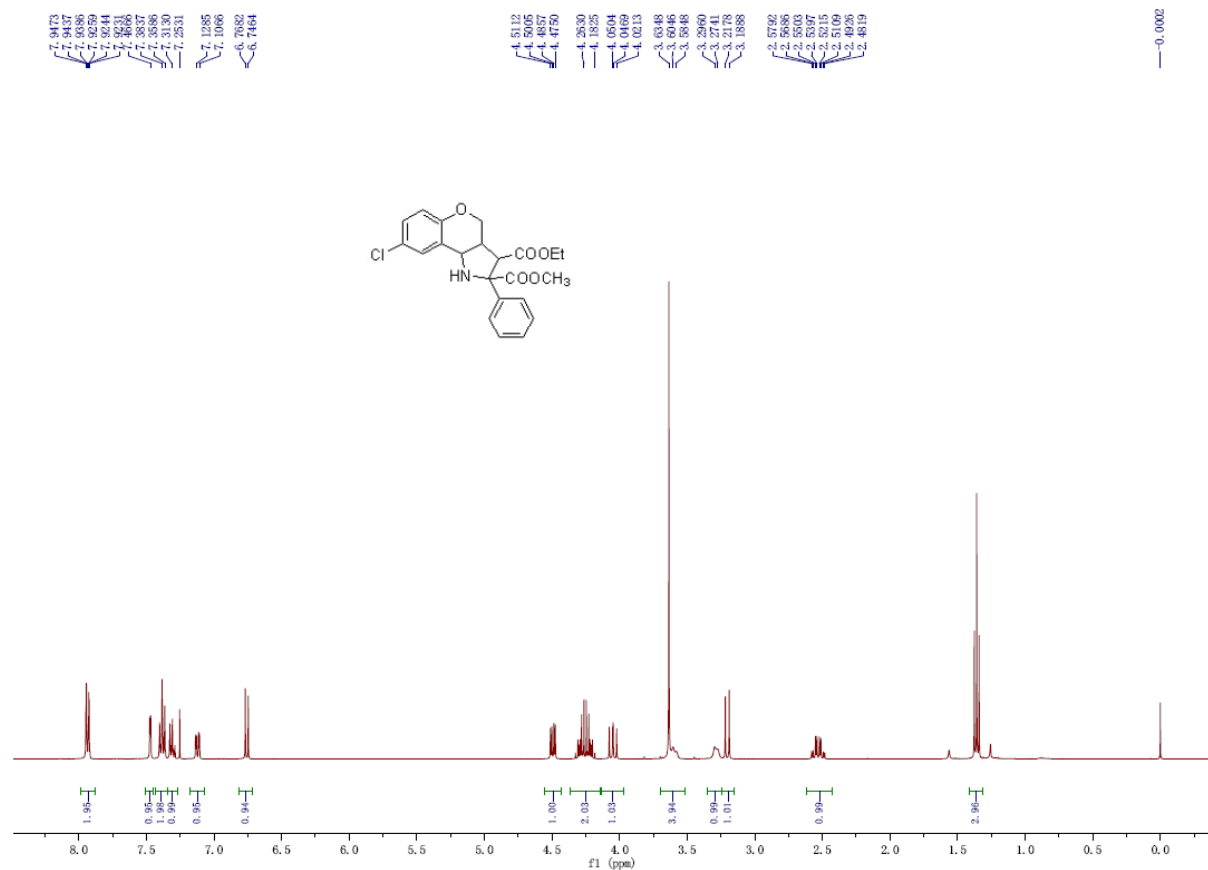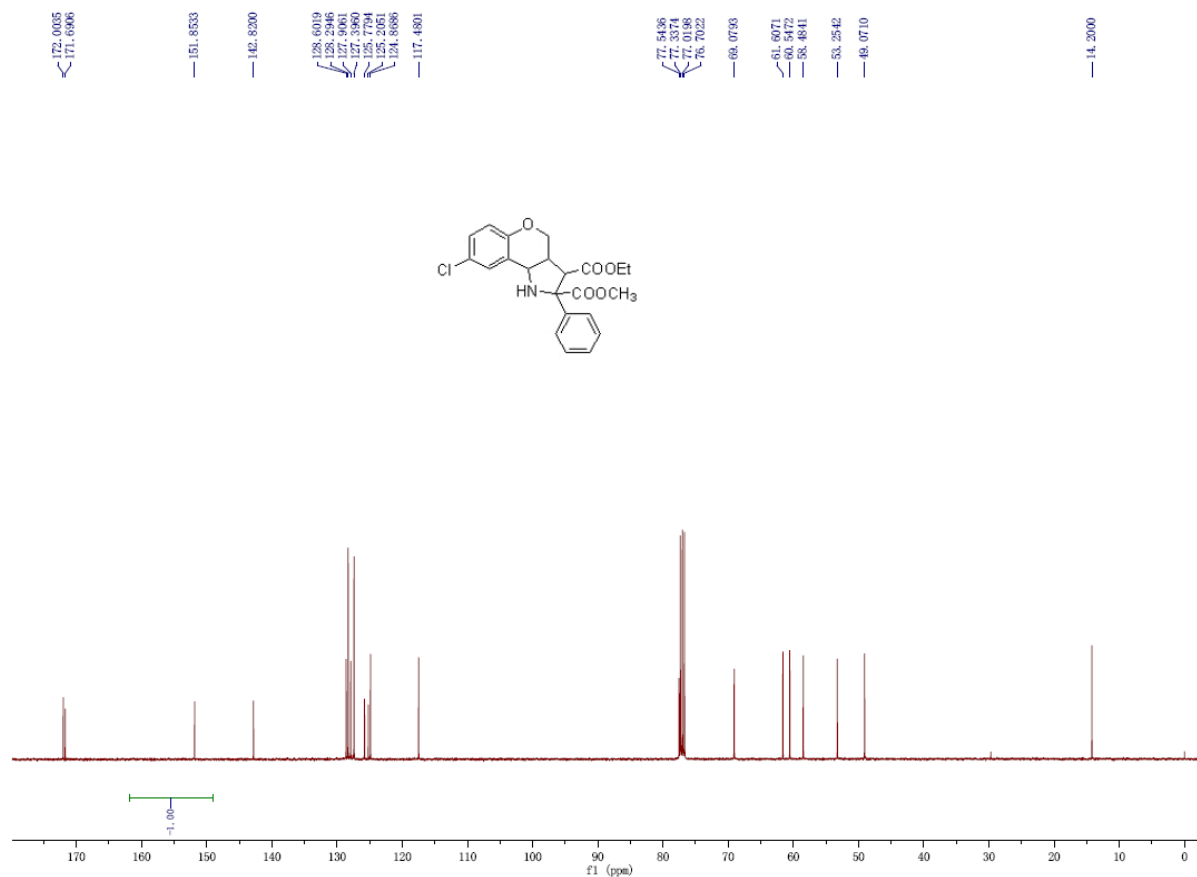

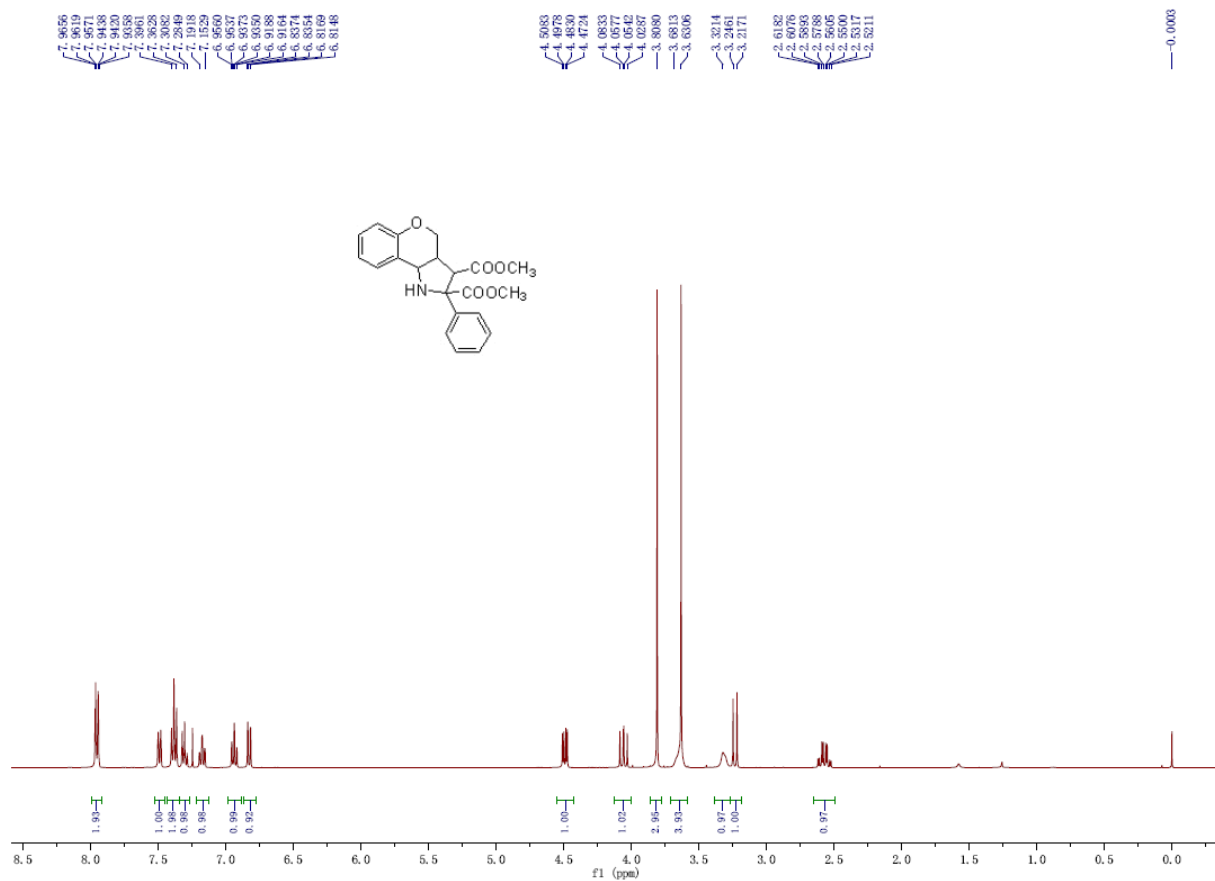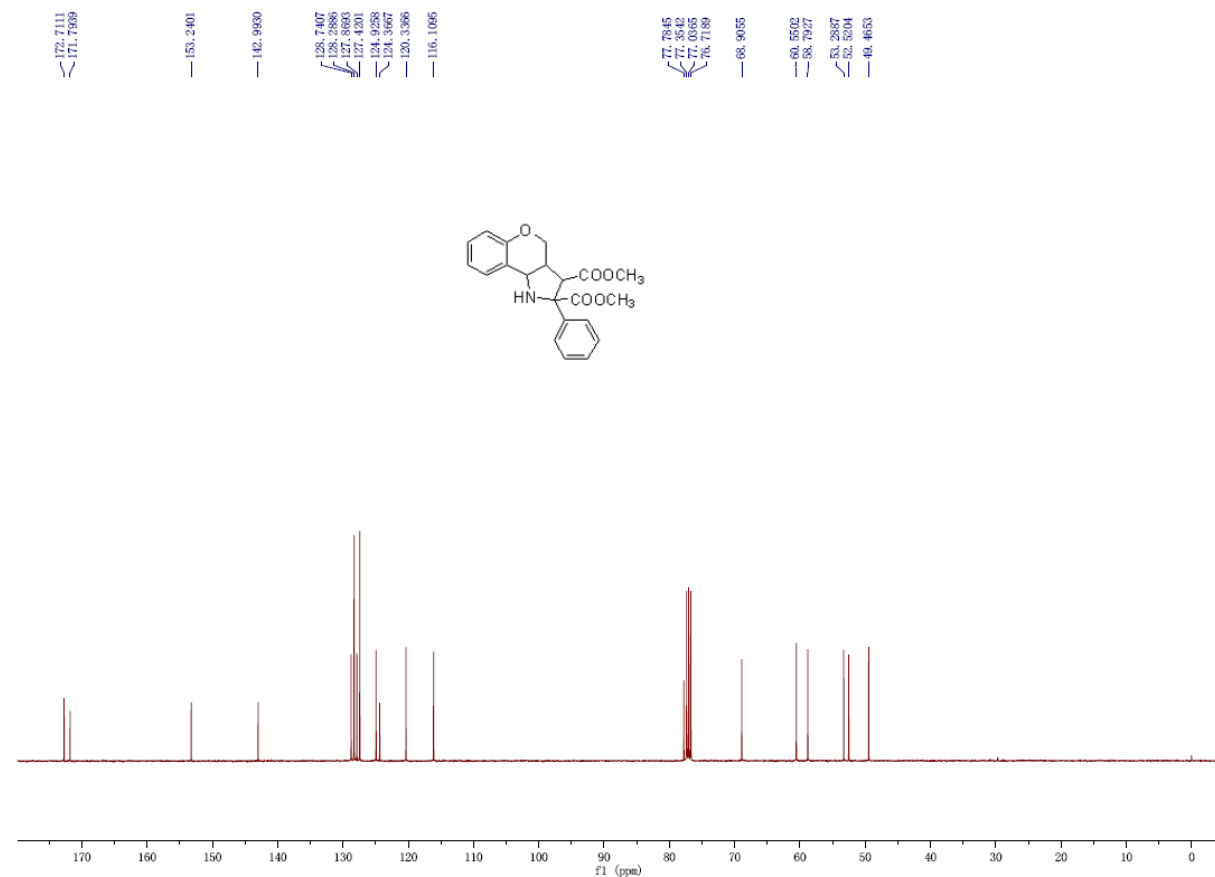

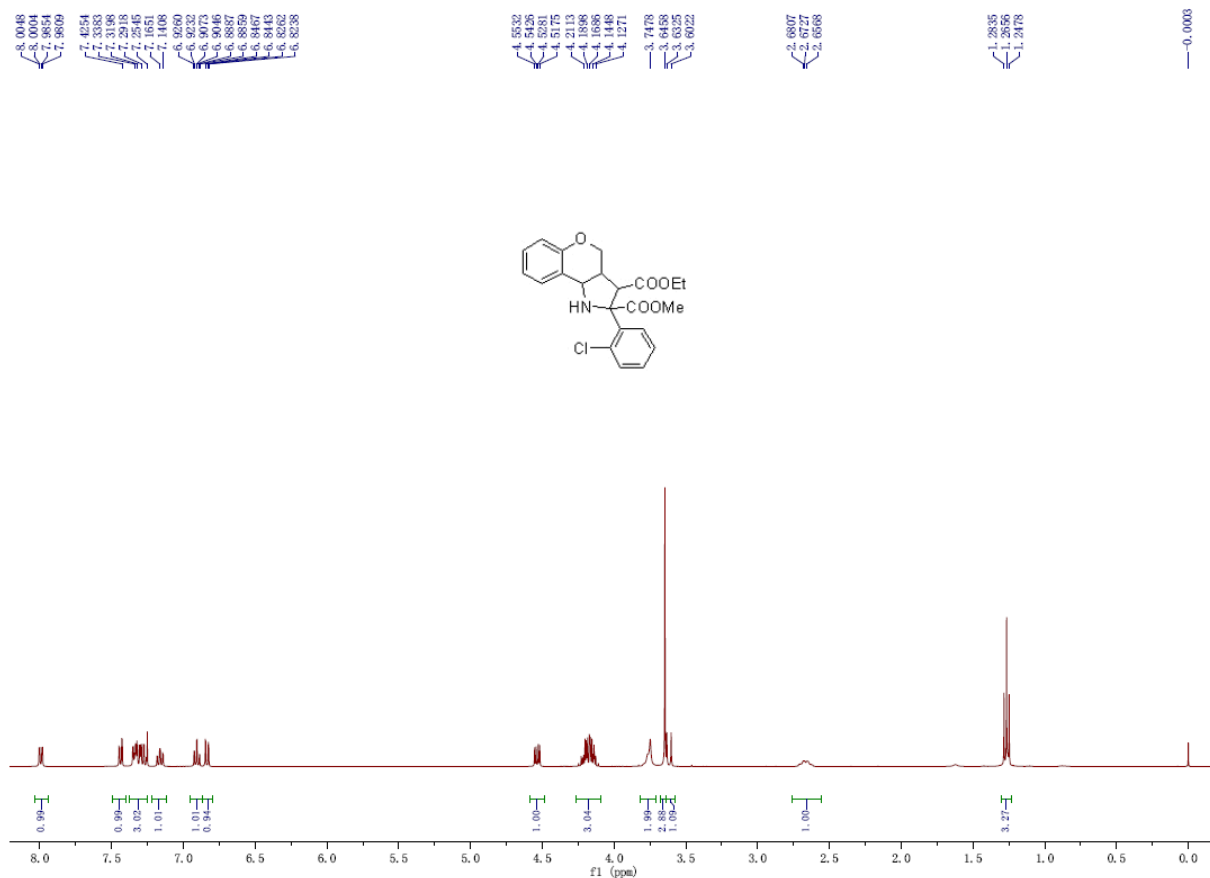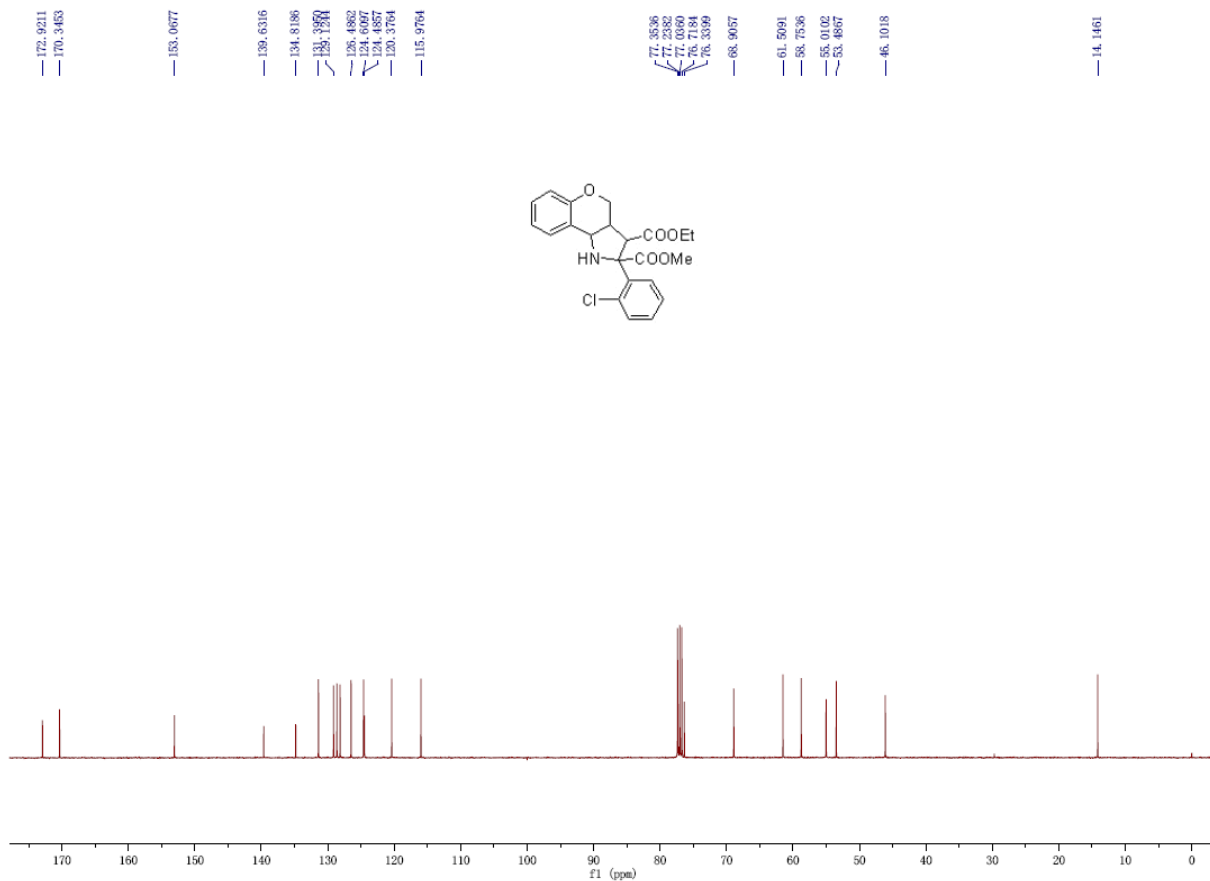

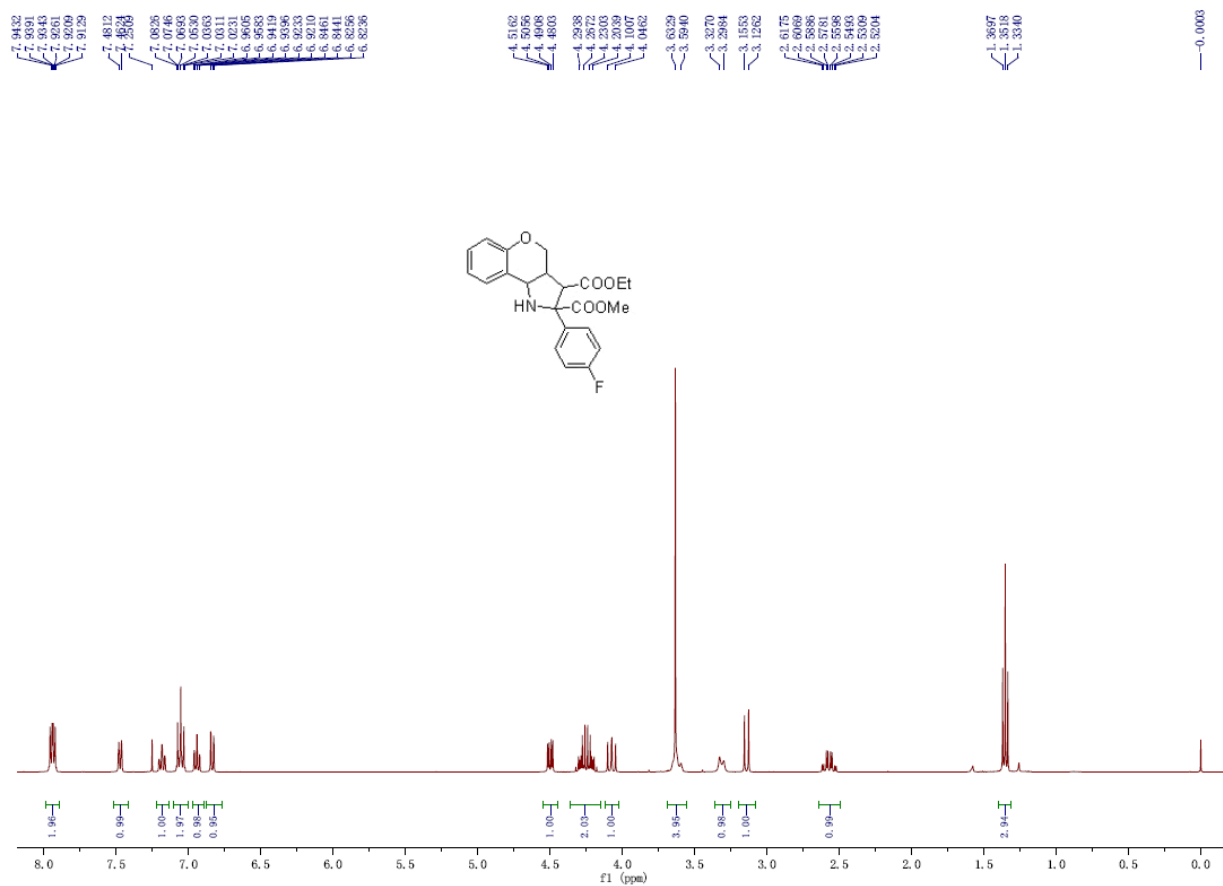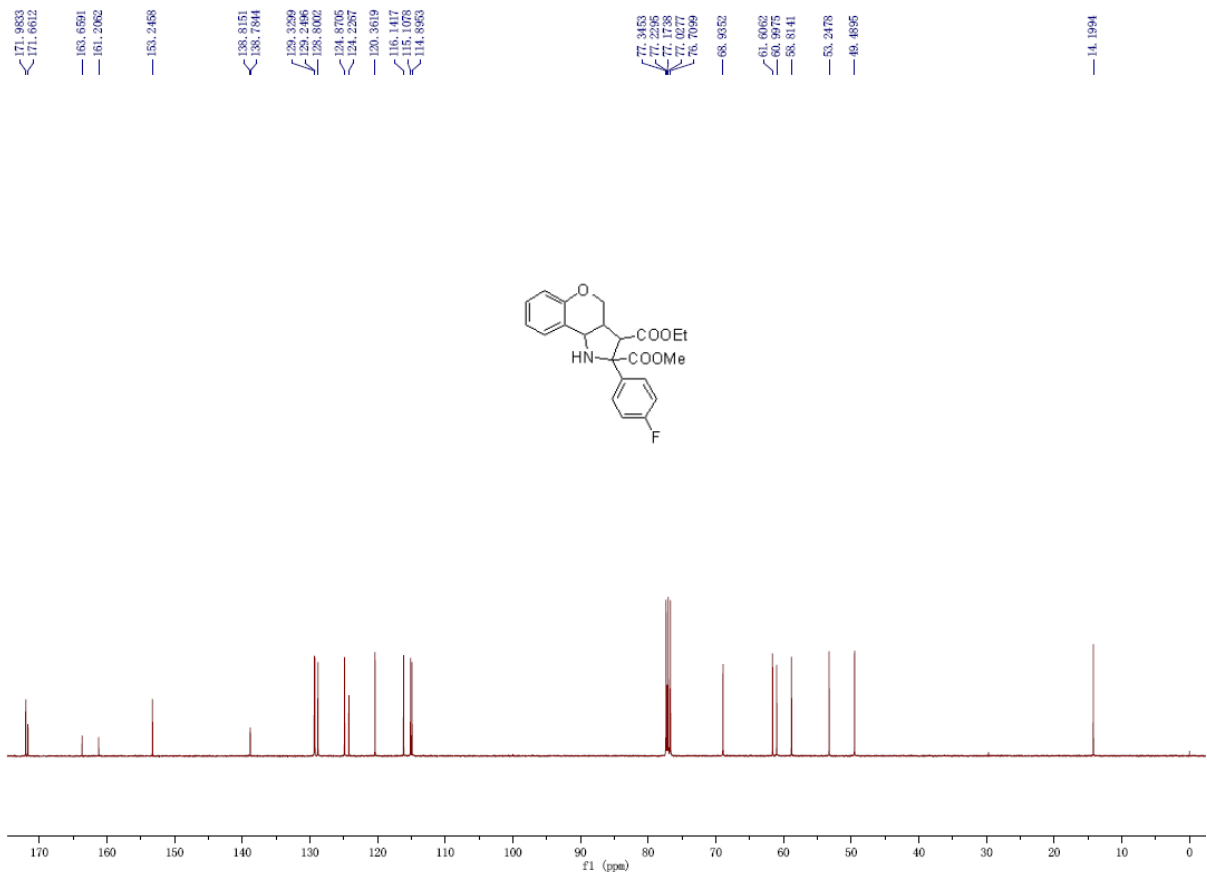

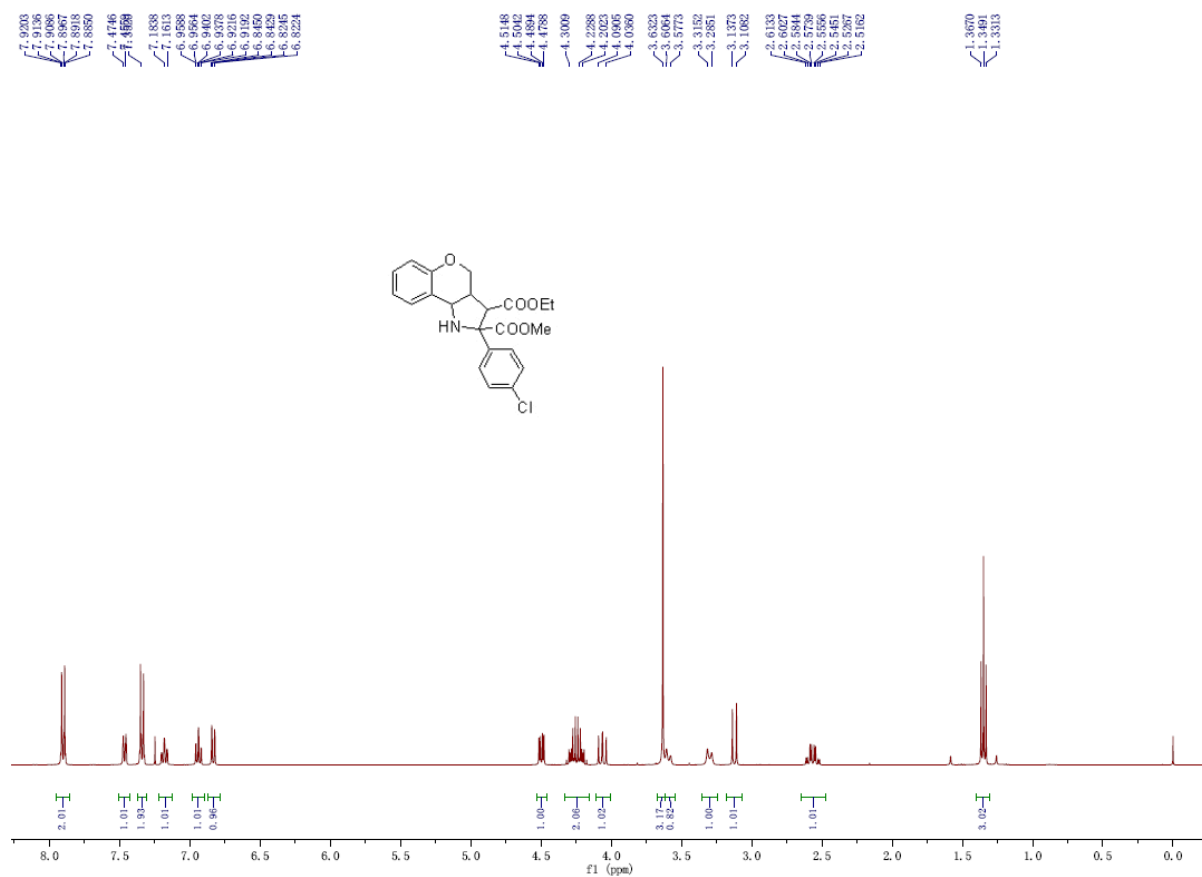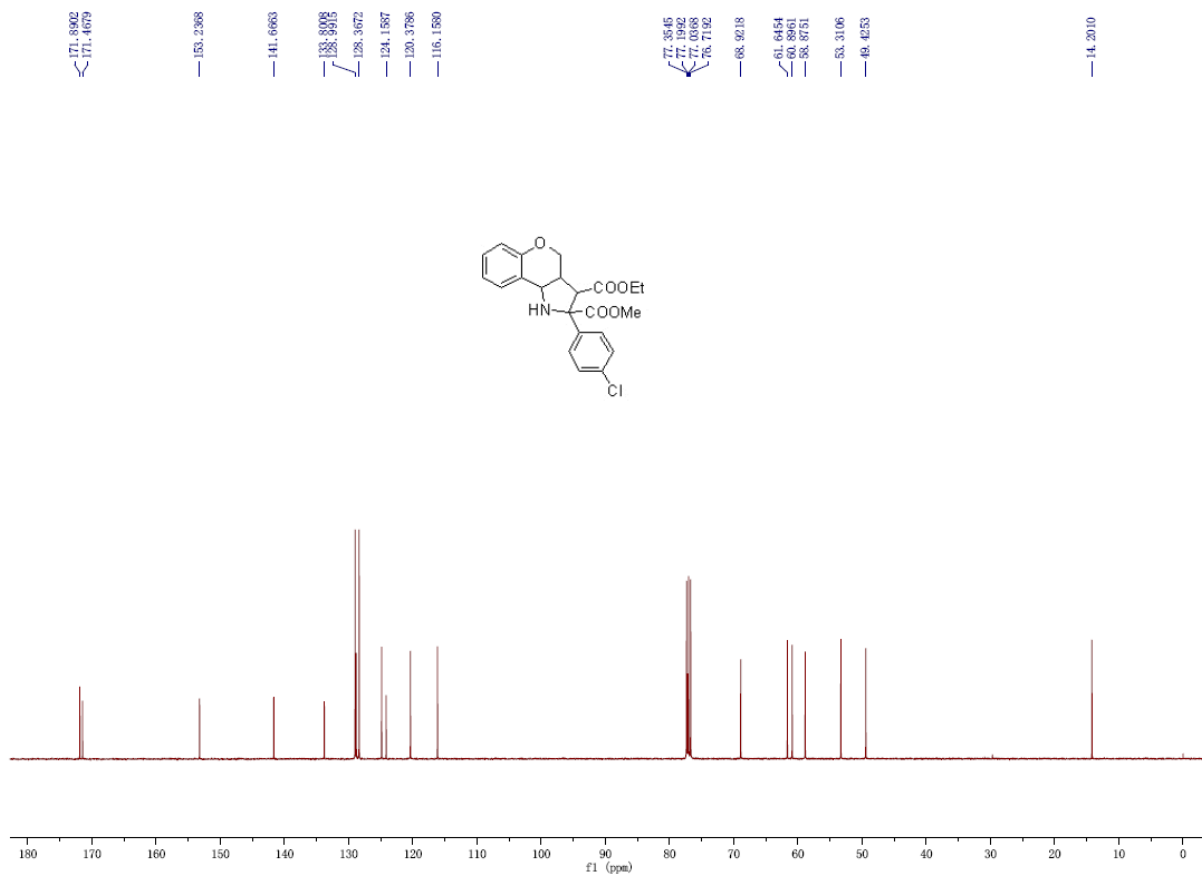

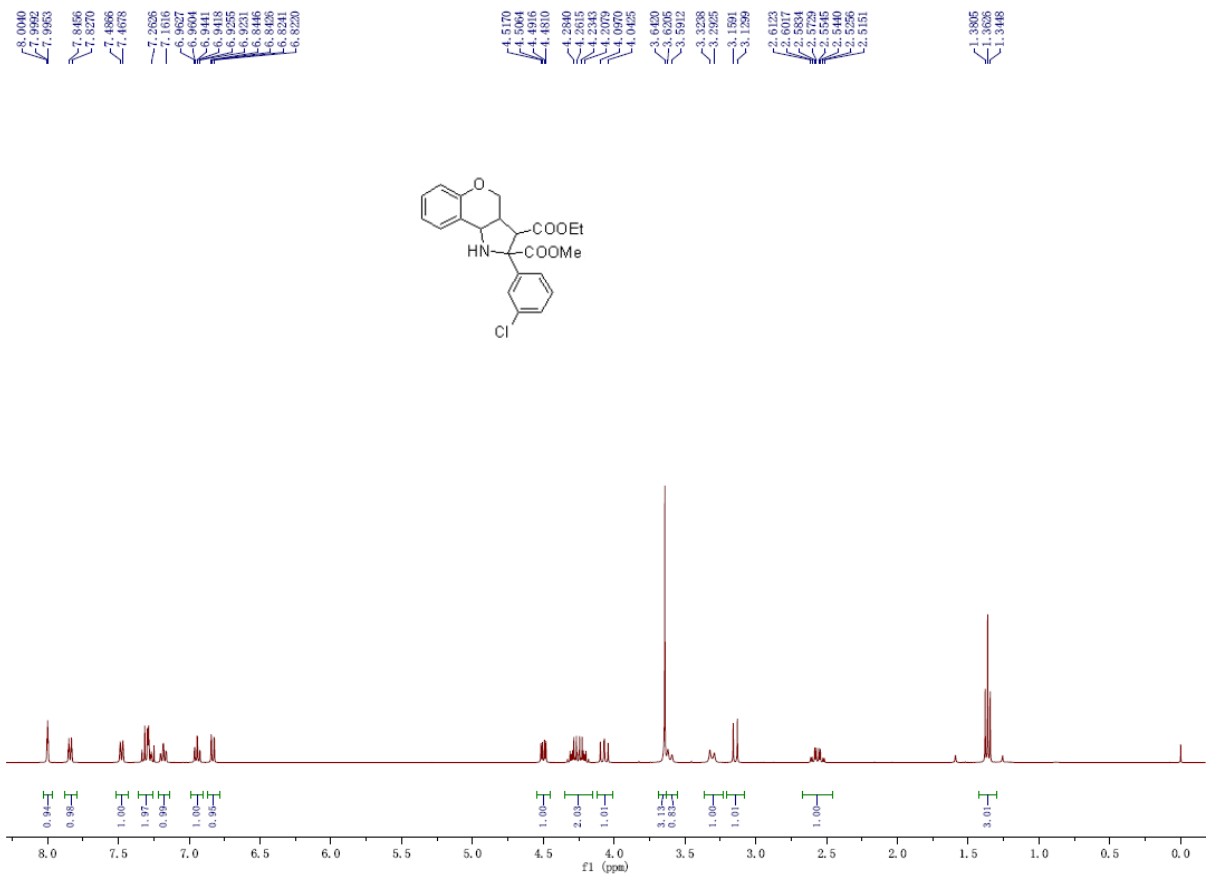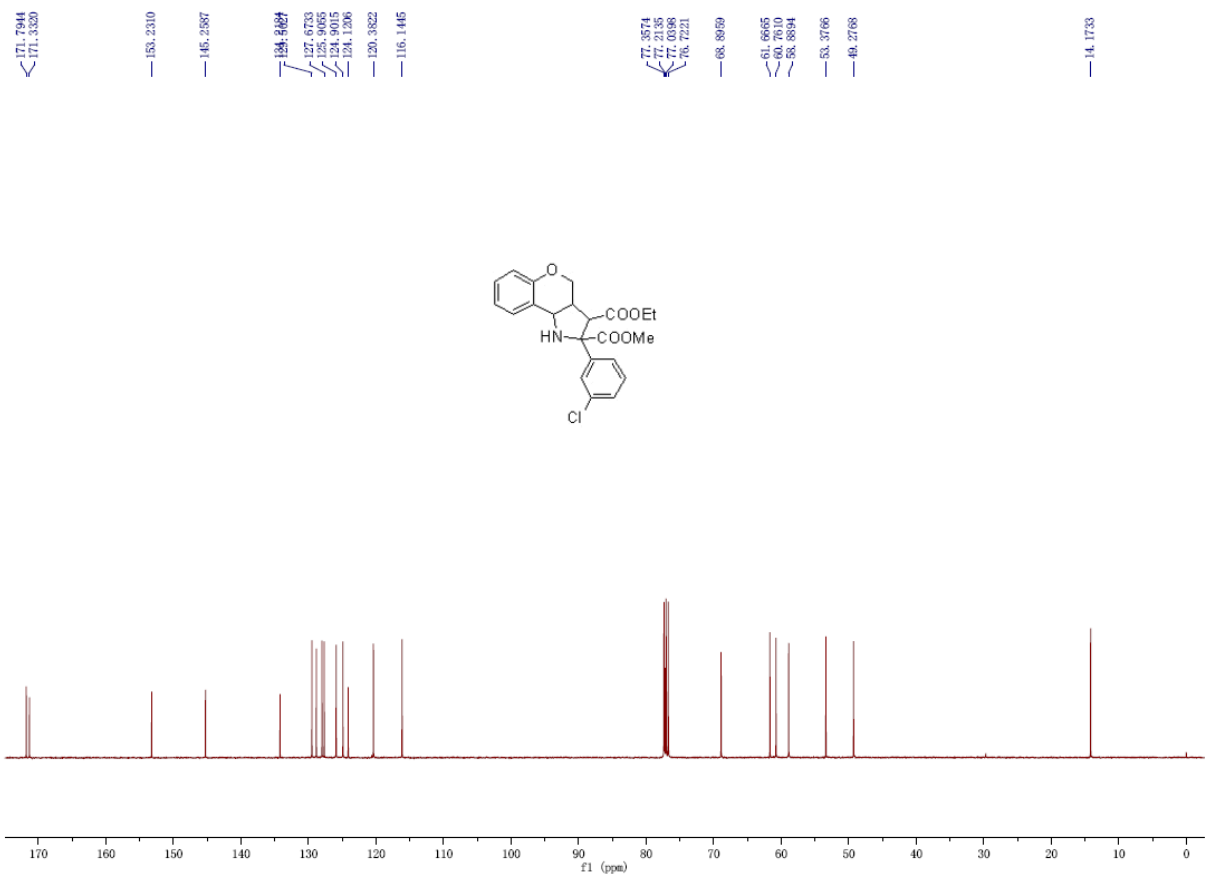

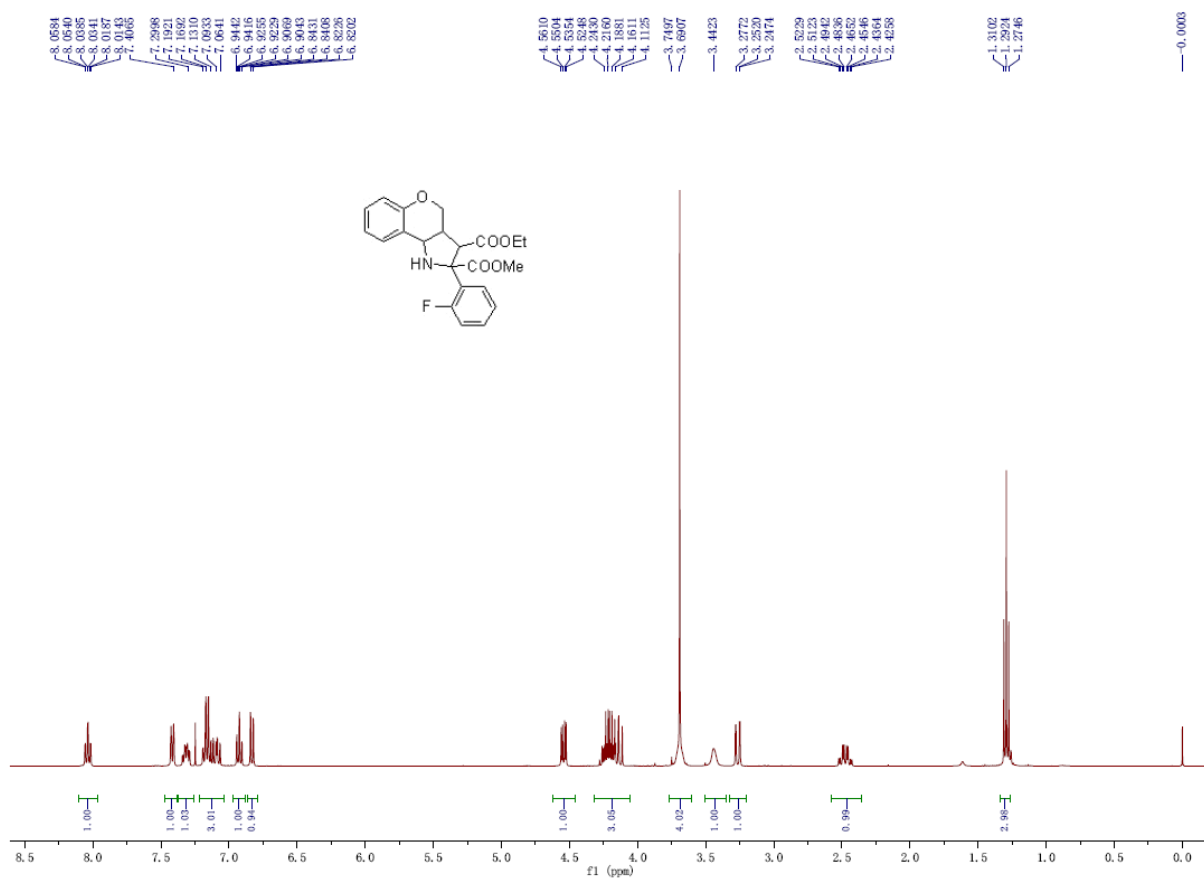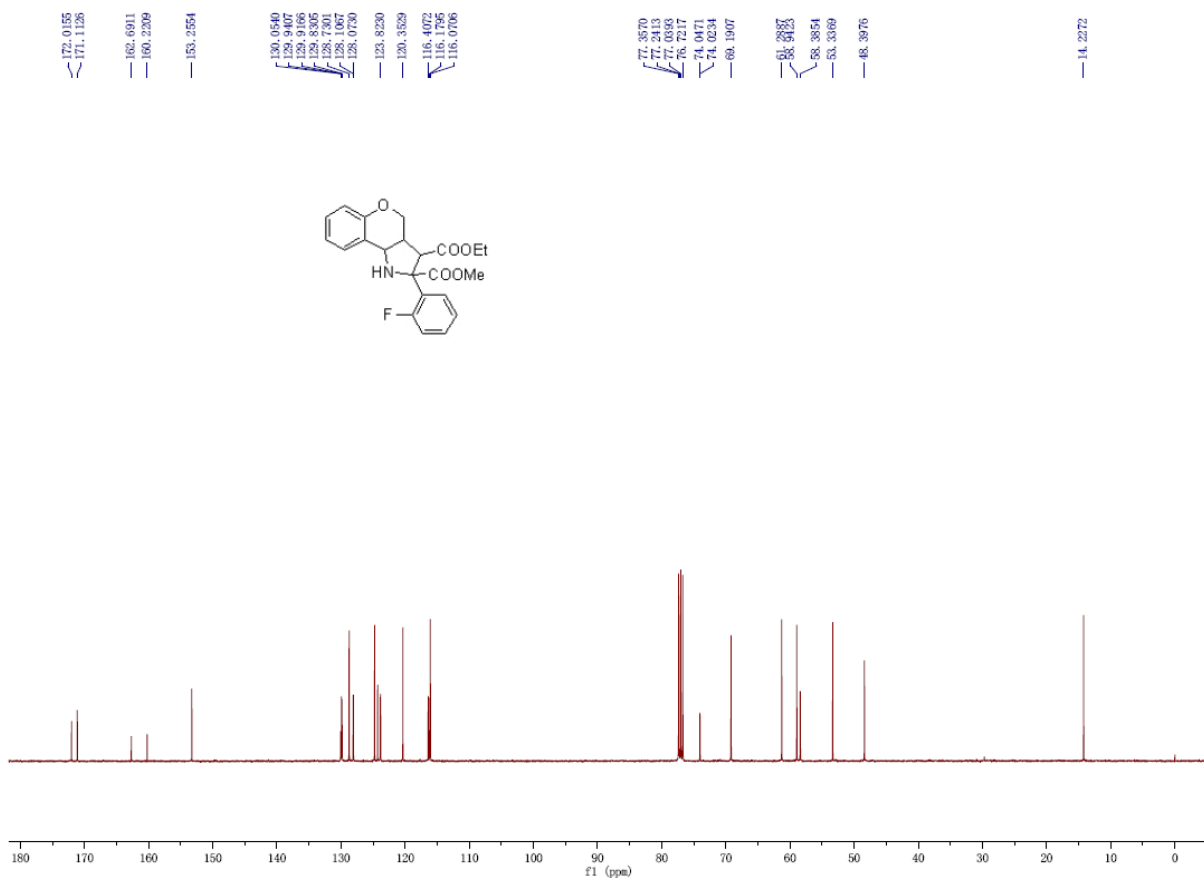



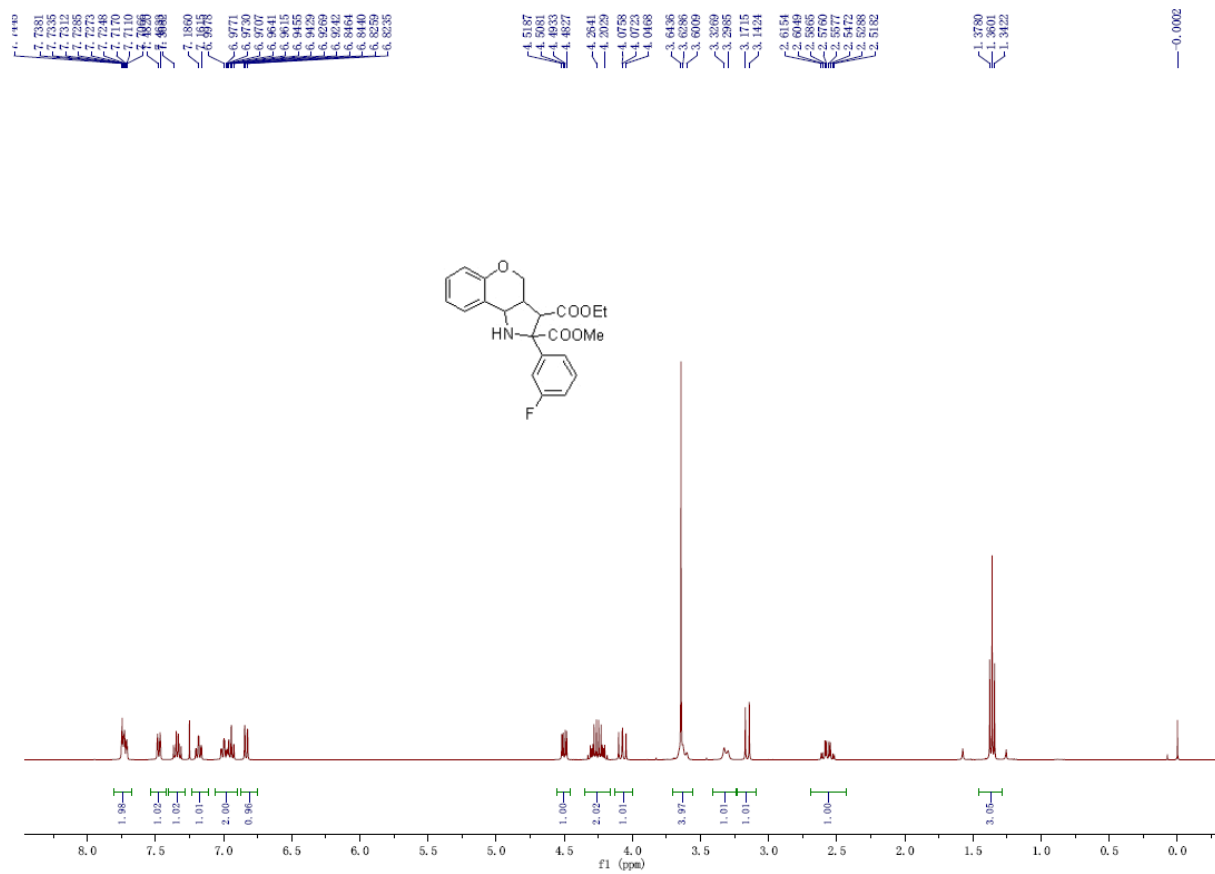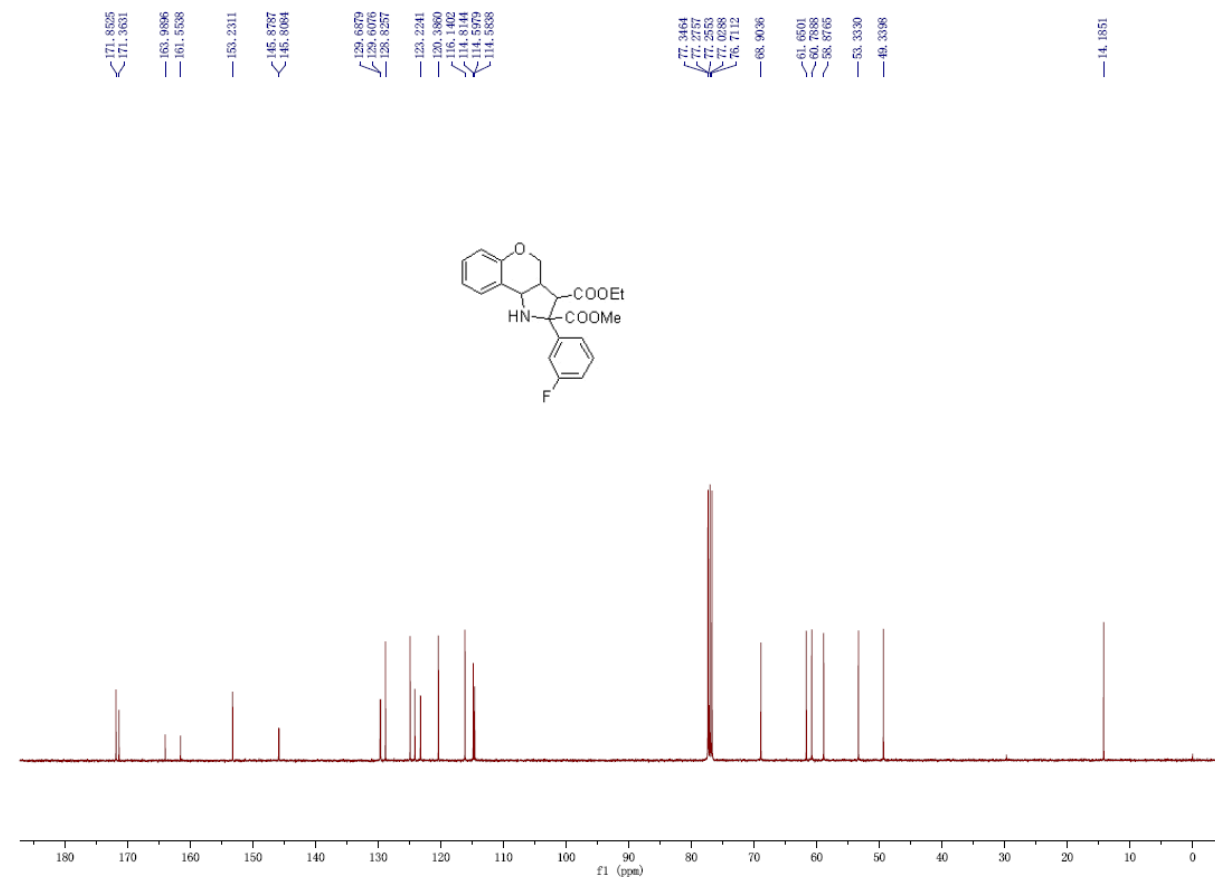

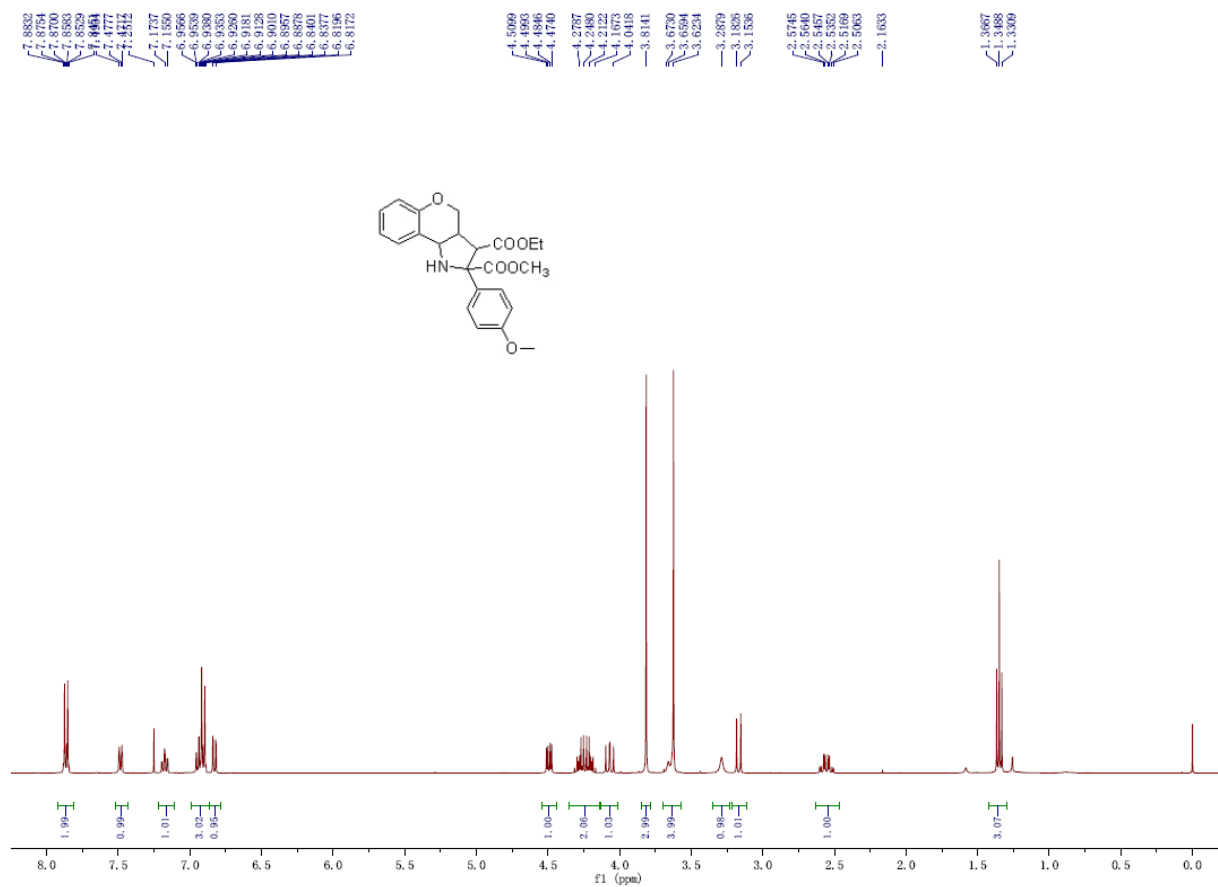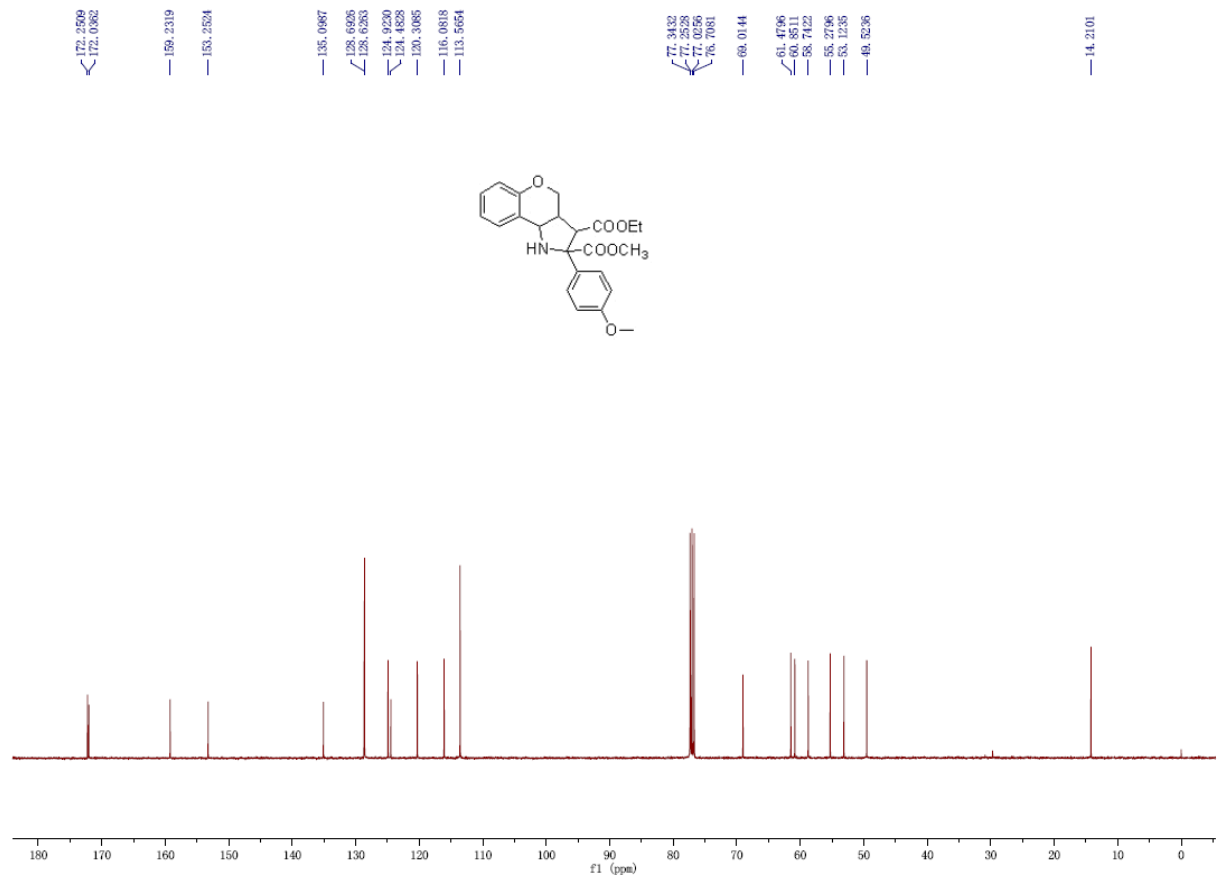

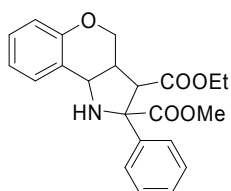

USTC

Project Name: linan  
 Reported by User: System

*Breeze*

| SAMPLE INFORMATION |                       |                  |                       |  |  |
|--------------------|-----------------------|------------------|-----------------------|--|--|
| Sample Name:       | LN-templete-rac-ad10% | Acquired By:     | System                |  |  |
| Sample Type:       | Unknown               | Date Acquired:   | 10/15/2009 4:55:21 PM |  |  |
| Vial:              | 1                     | Acq. Method:     | linanmethod10%        |  |  |
| Injection #:       | 1                     | Date Processed:  | 10/15/2009 5:14:38 PM |  |  |
| Injection Volume:  | 20.00 ul              | Channel Name:    | 2487Channel 1         |  |  |
| Run Time:          | 120.00 Minutes        | Sample Set Name: |                       |  |  |

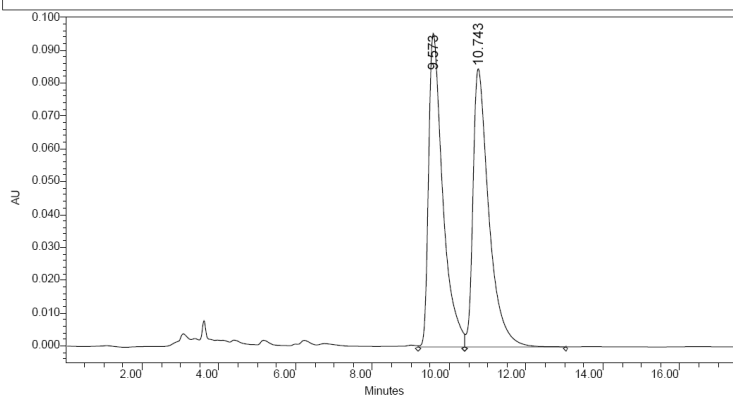

|   | RT (min) | Area (V*sec) | % Area | Height (V) | % Height |
|---|----------|--------------|--------|------------|----------|
| 1 | 9.573    | 2445627      | 50.11  | 95584      | 53.01    |
| 2 | 10.743   | 2434657      | 49.89  | 84736      | 46.99    |

USTC

Project Name: linan  
 Reported by User: System

*Breeze*

| SAMPLE INFORMATION |                   |                  |                       |  |  |
|--------------------|-------------------|------------------|-----------------------|--|--|
| Sample Name:       | LN-templete-ad10% | Acquired By:     | System                |  |  |
| Sample Type:       | Unknown           | Date Acquired:   | 10/15/2009 4:28:33 PM |  |  |
| Vial:              | 1                 | Acq. Method:     | linanmethod10%        |  |  |
| Injection #:       | 1                 | Date Processed:  | 10/15/2009 4:43:05 PM |  |  |
| Injection Volume:  | 20.00 ul          | Channel Name:    | 2487Channel 1         |  |  |
| Run Time:          | 120.00 Minutes    | Sample Set Name: |                       |  |  |

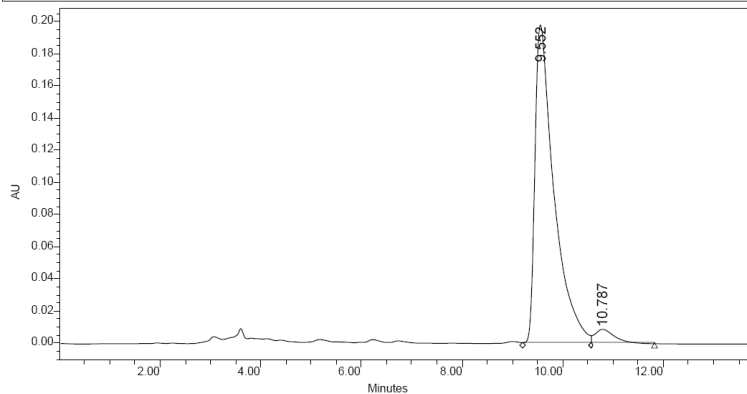

|   | RT (min) | Area (V*sec) | % Area | Height (V) | % Height |
|---|----------|--------------|--------|------------|----------|
| 1 | 9.552    | 5235067      | 95.49  | 198033     | 95.70    |
| 2 | 10.787   | 247298       | 4.51   | 8896       | 4.30     |

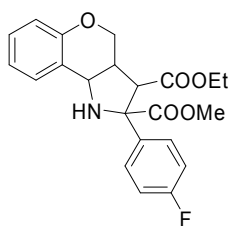

USTC

Project Name: linan  
 Reported by User: System

*Breeze*

| SAMPLE INFORMATION |                   |                  |                       |  |  |
|--------------------|-------------------|------------------|-----------------------|--|--|
| Sample Name:       | LN-10-9-rac-od15% | Acquired By:     | System                |  |  |
| Sample Type:       | Unknown           | Date Acquired:   | 10/13/2009 4:22:08 PM |  |  |
| Vial:              | 1                 | Acq. Method:     | linanmethod15%        |  |  |
| Injection #:       | 2                 | Date Processed:  | 10/13/2009 4:42:45 PM |  |  |
| Injection Volume:  | 20.00 ul          | Channel Name:    | 2487Channel 1         |  |  |
| Run Time:          | 120.00 Minutes    | Sample Set Name: |                       |  |  |

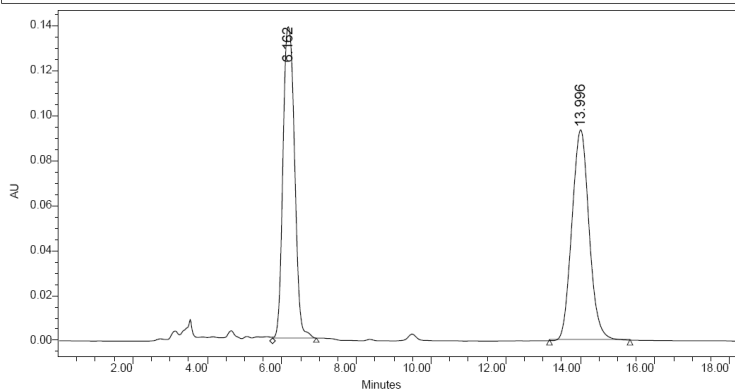

|   | RT (min) | Area (V*sec) | % Area | Height (V) | % Height |
|---|----------|--------------|--------|------------|----------|
| 1 | 6.162    | 2997285      | 49.89  | 138700     | 59.69    |
| 2 | 13.996   | 3010549      | 50.11  | 93653      | 40.31    |

USTC

Project Name: linan  
 Reported by User: System

*Breeze*

| SAMPLE INFORMATION |                |                  |                       |  |  |
|--------------------|----------------|------------------|-----------------------|--|--|
| Sample Name:       | LN-10-9-od15%  | Acquired By:     | System                |  |  |
| Sample Type:       | Unknown        | Date Acquired:   | 10/13/2009 5:08:53 PM |  |  |
| Vial:              | 1              | Acq. Method:     | linanmethod15%        |  |  |
| Injection #:       | 5              | Date Processed:  | 10/13/2009 5:28:39 PM |  |  |
| Injection Volume:  | 20.00 ul       | Channel Name:    | 2487Channel 1         |  |  |
| Run Time:          | 120.00 Minutes | Sample Set Name: |                       |  |  |

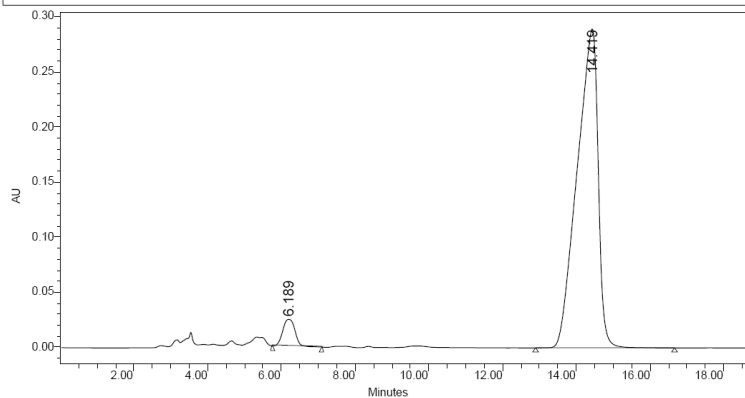

|   | RT (min) | Area (V*sec) | % Area | Height (V) | % Height |
|---|----------|--------------|--------|------------|----------|
| 1 | 6.189    | 560825       | 4.68   | 24416      | 7.78     |
| 2 | 14.419   | 11434502     | 95.32  | 289520     | 92.22    |

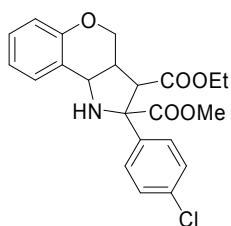

USTC

Project Name: linan  
 Reported by User: System

*Breeze*

| SAMPLE INFORMATION |                    |                  |                       |  |  |
|--------------------|--------------------|------------------|-----------------------|--|--|
| Sample Name:       | LN-10-10-rac-od15% | Acquired By:     | System                |  |  |
| Sample Type:       | Unknown            | Date Acquired:   | 9/22/2009 10:37:00 AM |  |  |
| Vial:              | 1                  | Acq. Method:     | linanmethod15%        |  |  |
| Injection #:       | 5                  | Date Processed:  | 9/22/2009 10:53:32 AM |  |  |
| Injection Volume:  | 20.00 ul           | Channel Name:    | 2487Channel 1         |  |  |
| Run Time:          | 90.00 Minutes      | Sample Set Name: |                       |  |  |

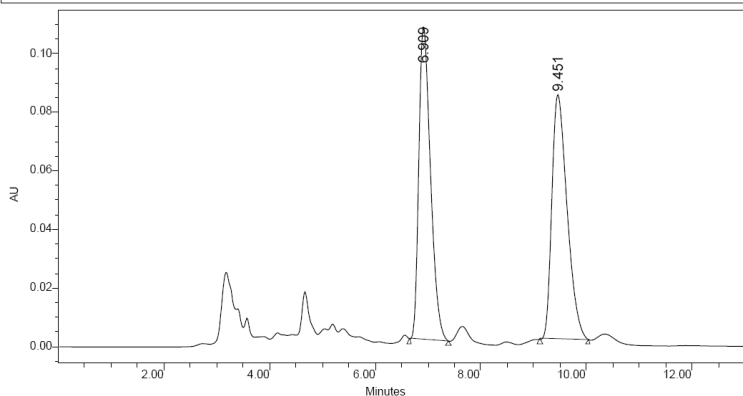

| RT (min) | Area (V*sec) | % Area | Height (V) | % Height |
|----------|--------------|--------|------------|----------|
| 1 6.909  | 1641691      | 49.45  | 107285     | 56.19    |
| 2 9.451  | 1678309      | 50.55  | 83650      | 43.81    |

USTC

Project Name: linan  
 Reported by User: System

*Breeze*

| SAMPLE INFORMATION |                |                  |                       |  |  |
|--------------------|----------------|------------------|-----------------------|--|--|
| Sample Name:       | LN-10-10-od15% | Acquired By:     | System                |  |  |
| Sample Type:       | Unknown        | Date Acquired:   | 10/13/2009 4:53:30 PM |  |  |
| Vial:              | 1              | Acq. Method:     | linanmethod15%        |  |  |
| Injection #:       | 4              | Date Processed:  | 10/13/2009 5:09:34 PM |  |  |
| Injection Volume:  | 20.00 ul       | Channel Name:    | 2487Channel 1         |  |  |
| Run Time:          | 120.00 Minutes | Sample Set Name: |                       |  |  |

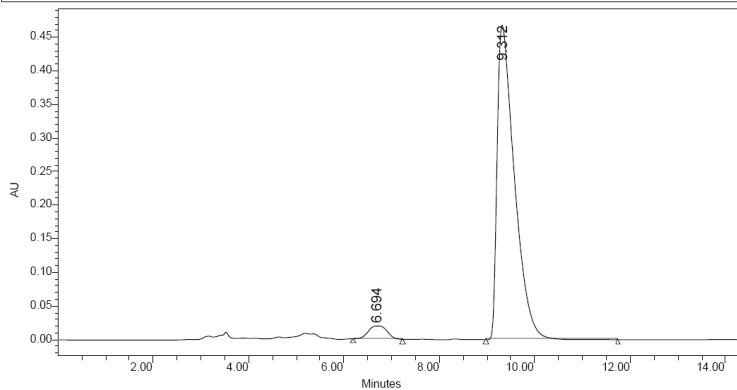

| RT (min) | Area (V*sec) | % Area | Height (V) | % Height |
|----------|--------------|--------|------------|----------|
| 1 6.694  | 529055       | 4.29   | 19437      | 3.99     |
| 2 9.312  | 11794633     | 95.71  | 468099     | 96.01    |

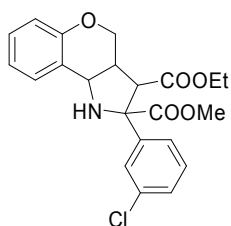

USTC

Project Name: linan  
 Reported by User: System

*Breeze*

| SAMPLE INFORMATION |                    |                  |                       |
|--------------------|--------------------|------------------|-----------------------|
| Sample Name:       | LN-10-11-rac-od15% | Acquired By:     | System                |
| Sample Type:       | Unknown            | Date Acquired:   | 9/22/2009 11:50:36 AM |
| Vial:              | 1                  | Acq. Method:     | linanmethod15%        |
| Injection #:       | 10                 | Date Processed:  | 9/22/2009 12:04:05 PM |
| Injection Volume:  | 20.00 ul           | Channel Name:    | 2487Channel 1         |
| Run Time:          | 90.00 Minutes      | Sample Set Name: |                       |

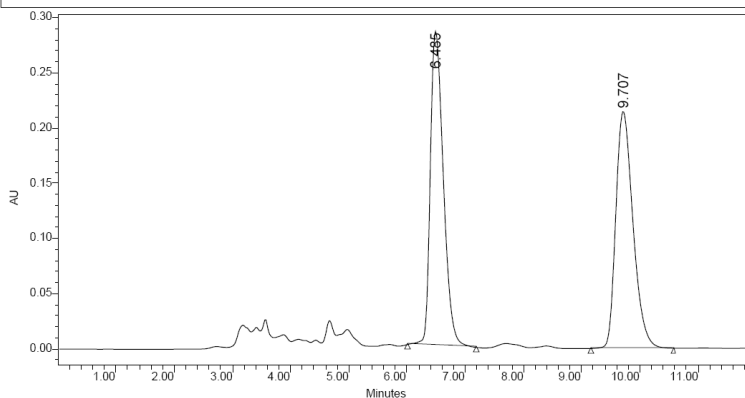

|   | RT (min) | Area (V <sup>2</sup> sec) | % Area | Height (V) | % Height |
|---|----------|---------------------------|--------|------------|----------|
| 1 | 6.485    | 4436064                   | 50.16  | 284821     | 57.01    |
| 2 | 9.707    | 4408367                   | 49.84  | 214814     | 42.99    |

USTC

Project Name: linan  
 Reported by User: System

*Breeze*

| SAMPLE INFORMATION |                |                  |                       |
|--------------------|----------------|------------------|-----------------------|
| Sample Name:       | LN-10-11-od15% | Acquired By:     | System                |
| Sample Type:       | Unknown        | Date Acquired:   | 10/13/2009 2:42:29 PM |
| Vial:              | 1              | Acq. Method:     | linanmethod15%        |
| Injection #:       | 3              | Date Processed:  | 10/13/2009 2:58:04 PM |
| Injection Volume:  | 20.00 ul       | Channel Name:    | 2487Channel 1         |
| Run Time:          | 120.00 Minutes | Sample Set Name: |                       |

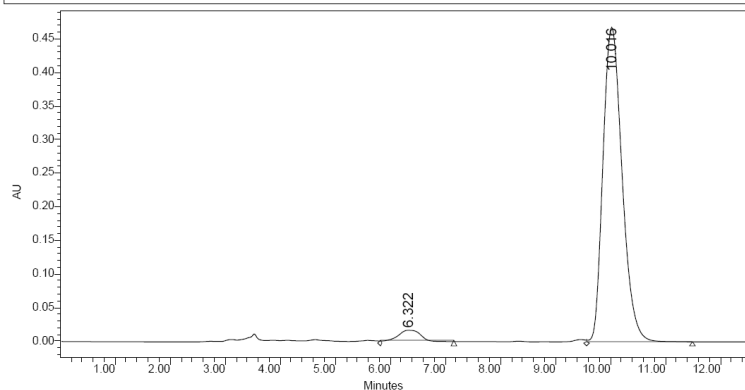

|   | RT (min) | Area (V <sup>2</sup> sec) | % Area | Height (V) | % Height |
|---|----------|---------------------------|--------|------------|----------|
| 1 | 6.322    | 481657                    | 4.10   | 16858      | 3.48     |
| 2 | 10.016   | 11269834                  | 95.90  | 468031     | 96.52    |

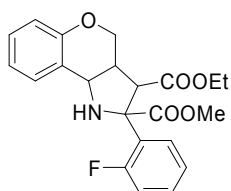

USTC

Project Name: linan  
 Reported by User: System

*Breeze*

| SAMPLE INFORMATION |                    |                  |                       |  |  |
|--------------------|--------------------|------------------|-----------------------|--|--|
| Sample Name:       | LN-10-15-rac-od15% | Acquired By:     | System                |  |  |
| Sample Type:       | Unknown            | Date Acquired:   | 10/13/2009 2:57:41 PM |  |  |
| Vial:              | 1                  | Acq. Method:     | linanmethod15%        |  |  |
| Injection #:       | 4                  | Date Processed:  | 10/13/2009 3:15:49 PM |  |  |
| Injection Volume:  | 20.00 ul           | Channel Name:    | 2487Channel 1         |  |  |
| Run Time:          | 120.00 Minutes     | Sample Set Name: |                       |  |  |

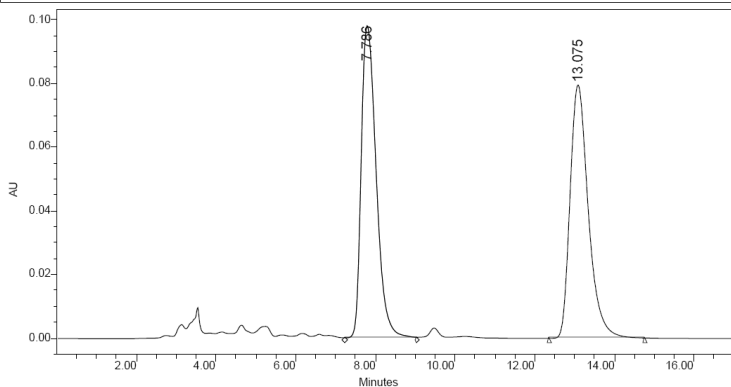

|   | RT (min) | Area (V*sec) | % Area | Height (V) | % Height |
|---|----------|--------------|--------|------------|----------|
| 1 | 7.786    | 2560481      | 50.29  | 98047      | 55.22    |
| 2 | 13.075   | 2530764      | 49.71  | 79523      | 44.78    |

USTC

Project Name: linan  
 Reported by User: System

*Breeze*

| SAMPLE INFORMATION |                |                  |                       |  |  |
|--------------------|----------------|------------------|-----------------------|--|--|
| Sample Name:       | LN-10-15-od15% | Acquired By:     | System                |  |  |
| Sample Type:       | Unknown        | Date Acquired:   | 10/13/2009 2:09:32 PM |  |  |
| Vial:              | 1              | Acq. Method:     | linanmethod15%        |  |  |
| Injection #:       | 1              | Date Processed:  | 10/13/2009 2:43:23 PM |  |  |
| Injection Volume:  | 20.00 ul       | Channel Name:    | 2487Channel 1         |  |  |
| Run Time:          | 120.00 Minutes | Sample Set Name: |                       |  |  |

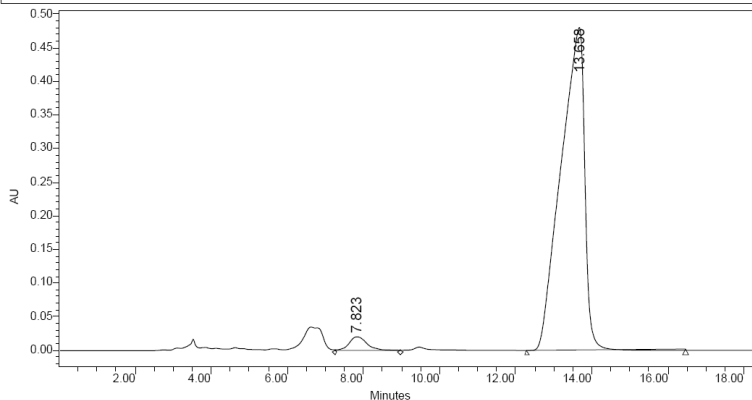

|   | RT (min) | Area (V*sec) | % Area | Height (V) | % Height |
|---|----------|--------------|--------|------------|----------|
| 1 | 7.823    | 682236       | 3.17   | 20416      | 4.07     |
| 2 | 13.658   | 20861083     | 96.83  | 480714     | 95.93    |

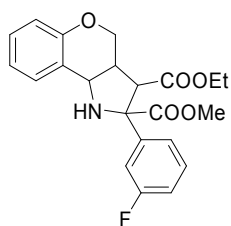

USTC

Project Name: linan  
 Reported by User: System

*Breeze*

| SAMPLE INFORMATION |                    |                  |                      |
|--------------------|--------------------|------------------|----------------------|
| Sample Name:       | LN-10-16-rac-od15% | Acquired By:     | System               |
| Sample Type:       | Unknown            | Date Acquired:   | 9/22/2009 9:23:56 AM |
| Vial:              | 1                  | Acq. Method:     | linanmethod15%       |
| Injection #:       | 1                  | Date Processed:  | 9/22/2009 9:40:17 AM |
| Injection Volume:  | 20.00 ul           | Channel Name:    | 2487Channel 1        |
| Run Time:          | 90.00 Minutes      | Sample Set Name: |                      |

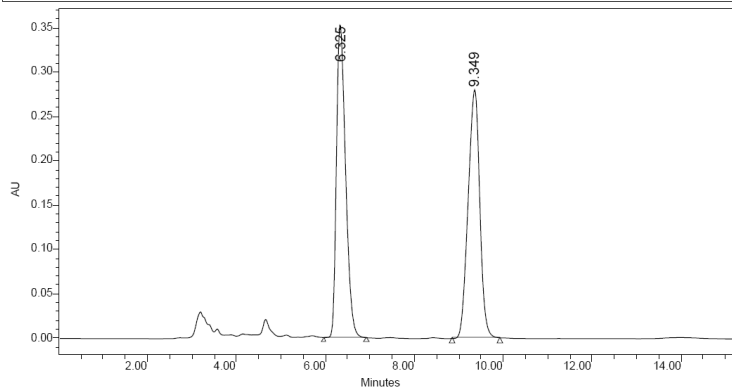

| RT (min) | Area (V*sec) | % Area | Height (V) | % Height |
|----------|--------------|--------|------------|----------|
| 1 6.325  | 5055105      | 49.75  | 354100     | 55.81    |
| 2 9.349  | 5106408      | 50.25  | 280336     | 44.19    |

USTC

Project Name: linan  
 Reported by User: System

*Breeze*

| SAMPLE INFORMATION |                |                  |                       |
|--------------------|----------------|------------------|-----------------------|
| Sample Name:       | LN-10-16-od15% | Acquired By:     | System                |
| Sample Type:       | Unknown        | Date Acquired:   | 10/13/2009 2:28:46 PM |
| Vial:              | 1              | Acq. Method:     | linanmethod15%        |
| Injection #:       | 2              | Date Processed:  | 10/13/2009 2:42:53 PM |
| Injection Volume:  | 20.00 ul       | Channel Name:    | 2487Channel 1         |
| Run Time:          | 120.00 Minutes | Sample Set Name: |                       |

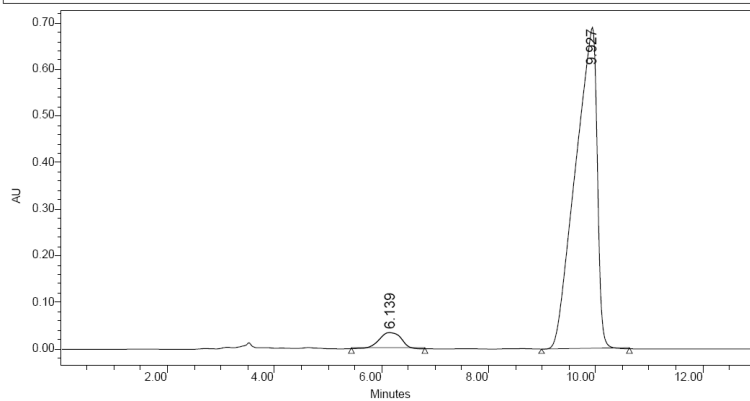

| RT (min) | Area (V*sec) | % Area | Height (V) | % Height |
|----------|--------------|--------|------------|----------|
| 1 6.139  | 1016410      | 4.97   | 34691      | 4.78     |
| 2 9.927  | 19438530     | 95.03  | 691088     | 95.22    |



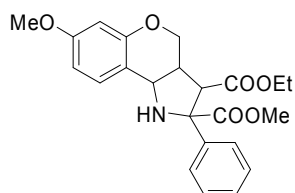

USTC

Project Name: linan  
 Reported by User: System

*Breeze*

| SAMPLE INFORMATION |                   |                  |                       |  |  |
|--------------------|-------------------|------------------|-----------------------|--|--|
| Sample Name:       | LN-10-21-rac-od5% | Acquired By:     | System                |  |  |
| Sample Type:       | Unknown           | Date Acquired:   | 10/13/2009 7:42:31 PM |  |  |
| Vial:              | 1                 | Acq. Method:     | linanmethod5%         |  |  |
| Injection #:       | 3                 | Date Processed:  | 10/13/2009 8:00:17 PM |  |  |
| Injection Volume:  | 20.00 ul          | Channel Name:    | 2487Channel 1         |  |  |
| Run Time:          | 120.00 Minutes    | Sample Set Name: |                       |  |  |

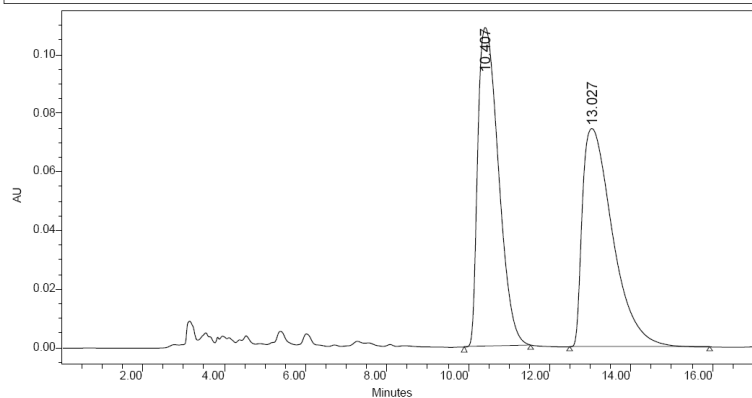

|   | RT (min) | Area (V*sec) | % Area | Height (V) | % Height |
|---|----------|--------------|--------|------------|----------|
| 1 | 10.407   | 3837893      | 49.87  | 108814     | 59.36    |
| 2 | 13.027   | 3858183      | 50.13  | 74509      | 40.64    |

USTC

Project Name: linan  
 Reported by User: System

*Breeze*

| SAMPLE INFORMATION |                |                  |                       |  |  |
|--------------------|----------------|------------------|-----------------------|--|--|
| Sample Name:       | LN-10-21-od5%  | Acquired By:     | System                |  |  |
| Sample Type:       | Unknown        | Date Acquired:   | 10/13/2009 6:37:57 PM |  |  |
| Vial:              | 1              | Acq. Method:     | linanmethod5%         |  |  |
| Injection #:       | 1              | Date Processed:  | 10/13/2009 6:58:51 PM |  |  |
| Injection Volume:  | 20.00 ul       | Channel Name:    | 2487Channel 1         |  |  |
| Run Time:          | 120.00 Minutes | Sample Set Name: |                       |  |  |

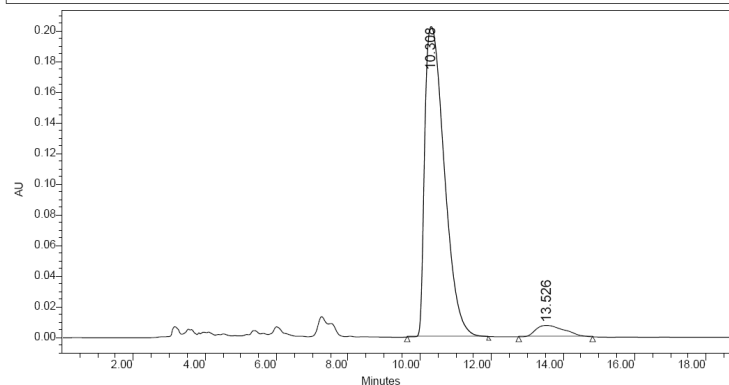

|   | RT (min) | Area (V*sec) | % Area | Height (V) | % Height |
|---|----------|--------------|--------|------------|----------|
| 1 | 10.308   | 7659960      | 94.86  | 202203     | 96.45    |
| 2 | 13.526   | 415063       | 5.14   | 7449       | 3.55     |

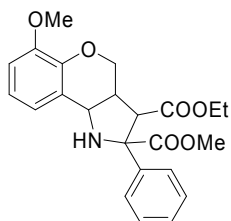

USTC

Project Name: linan  
 Reported by User: System

Breeze

| SAMPLE INFORMATION |                   |                  |                        |
|--------------------|-------------------|------------------|------------------------|
| Sample Name:       | LN-10-24-rac-ad3% | Acquired By:     | System                 |
| Sample Type:       | Unknown           | Date Acquired:   | 9/23/2009 5:25:41 PM   |
| Vial:              | 1                 | Acq. Method:     | linanmethod3%          |
| Injection #:       | 1                 | Date Processed:  | 10/12/2009 11:38:18 PM |
| Injection Volume:  | 20.00 ul          | Channel Name:    | 2487Channel 1          |
| Run Time:          | 120.00 Minutes    | Sample Set Name: |                        |

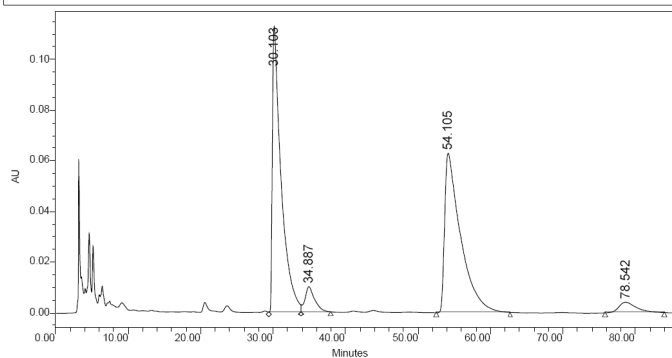

|   | RT (min) | Area (V*sec) | % Area | Height (V) | % Height |
|---|----------|--------------|--------|------------|----------|
| 1 | 30.103   | 9504115      | 45.76  | 112812     | 59.37    |
| 2 | 34.887   | 914221       | 4.40   | 10005      | 5.27     |
| 3 | 54.105   | 9635614      | 46.39  | 62992      | 33.15    |
| 4 | 78.542   | 716558       | 3.45   | 4204       | 2.21     |

USTC

Project Name: linan  
 Reported by User: System

Breeze

| SAMPLE INFORMATION |                |                  |                        |
|--------------------|----------------|------------------|------------------------|
| Sample Name:       | LN-10-24-ad3%  | Acquired By:     | System                 |
| Sample Type:       | Unknown        | Date Acquired:   | 10/12/2009 10:05:18 PM |
| Vial:              | 1              | Acq. Method:     | linanmethod3%          |
| Injection #:       | 1              | Date Processed:  | 10/12/2009 11:36:44 PM |
| Injection Volume:  | 20.00 ul       | Channel Name:    | 2487Channel 1          |
| Run Time:          | 120.00 Minutes | Sample Set Name: |                        |

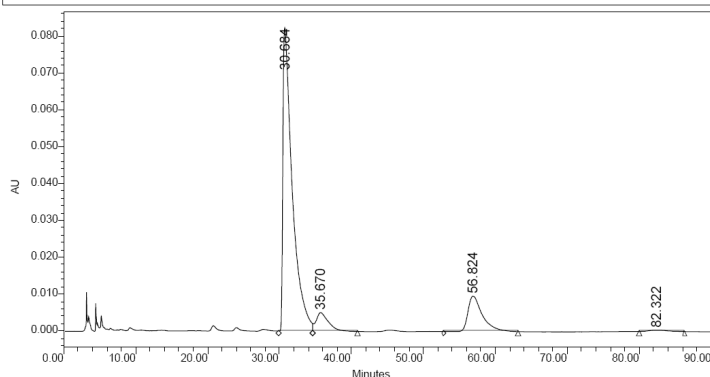

|   | RT (min) | Area (V*sec) | % Area | Height (V) | % Height |
|---|----------|--------------|--------|------------|----------|
| 1 | 30.684   | 7478777      | 78.84  | 82359      | 84.55    |
| 2 | 35.670   | 605054       | 6.38   | 5128       | 5.26     |
| 3 | 56.824   | 1343364      | 14.16  | 9578       | 9.83     |
| 4 | 82.322   | 58887        | 0.62   | 343        | 0.35     |

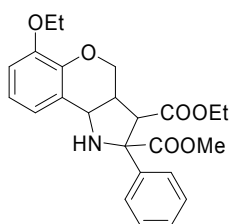

USTC

Project Name: linan  
 Reported by User: System

*Breeze*

| SAMPLE INFORMATION |                    |                  |                       |  |  |
|--------------------|--------------------|------------------|-----------------------|--|--|
| Sample Name:       | LN-10-25-rac-ad10% | Acquired By:     | System                |  |  |
| Sample Type:       | Unknown            | Date Acquired:   | 9/23/2009 12:59:24 PM |  |  |
| Vial:              | 1                  | Acq. Method:     | linanmethod10%        |  |  |
| Injection #:       | 1                  | Date Processed:  | 10/12/2009 8:17:51 PM |  |  |
| Injection Volume:  | 20.00 ul           | Channel Name:    | 2487Channel 1         |  |  |
| Run Time:          | 90.00 Minutes      | Sample Set Name: |                       |  |  |

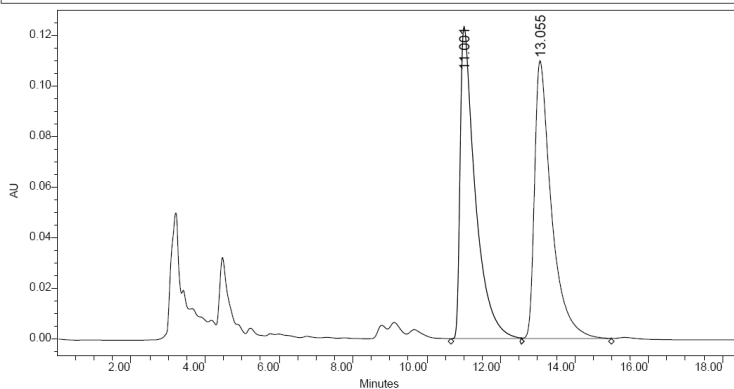

|   | RT (min) | Area (V*sec) | % Area | Height (V) | % Height |
|---|----------|--------------|--------|------------|----------|
| 1 | 11.001   | 3538920      | 49.89  | 123798     | 52.87    |
| 2 | 13.055   | 3555218      | 50.11  | 110348     | 47.13    |

USTC

Project Name: linan  
 Reported by User: System

*Breeze*

| SAMPLE INFORMATION |                |                  |                       |  |  |
|--------------------|----------------|------------------|-----------------------|--|--|
| Sample Name:       | LN-10-25-ad10% | Acquired By:     | System                |  |  |
| Sample Type:       | Unknown        | Date Acquired:   | 10/12/2009 9:37:38 PM |  |  |
| Vial:              | 1              | Acq. Method:     | linanmethod10%        |  |  |
| Injection #:       | 6              | Date Processed:  | 10/12/2009 9:54:55 PM |  |  |
| Injection Volume:  | 20.00 ul       | Channel Name:    | 2487Channel 1         |  |  |
| Run Time:          | 120.00 Minutes | Sample Set Name: |                       |  |  |

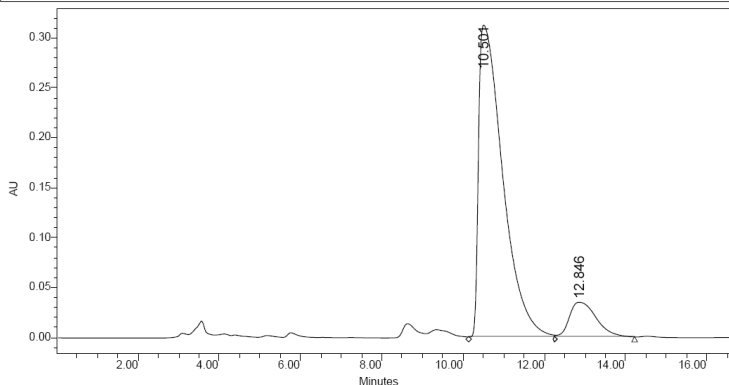

|   | RT (min) | Area (V*sec) | % Area | Height (V) | % Height |
|---|----------|--------------|--------|------------|----------|
| 1 | 10.501   | 12942036     | 88.87  | 312835     | 89.92    |
| 2 | 12.846   | 1621154      | 11.13  | 35074      | 10.08    |

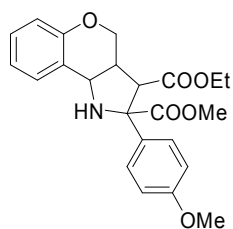

USTC

Project Name: linan  
 Reported by User: System

Breeze

| SAMPLE INFORMATION |                    |                  |                       |  |  |
|--------------------|--------------------|------------------|-----------------------|--|--|
| Sample Name:       | LN-10-31-rac-od30% | Acquired By:     | System                |  |  |
| Sample Type:       | Unknown            | Date Acquired:   | 9/21/2009 4:43:34 PM  |  |  |
| Vial:              | 1                  | Acq. Method:     | LN100%A               |  |  |
| Injection #:       | 6                  | Date Processed:  | 9/22/2009 10:00:33 AM |  |  |
| Injection Volume:  | 20.00 ul           | Channel Name:    | 2487Channel 1         |  |  |
| Run Time:          | 90.00 Minutes      | Sample Set Name: |                       |  |  |

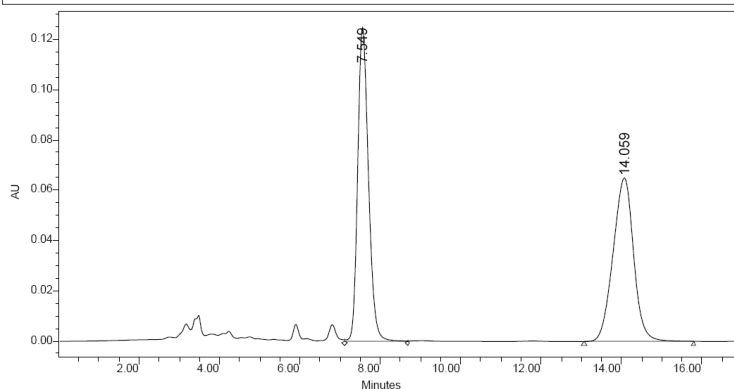

|   | RT (min) | Area (V*sec) | % Area | Height (V) | % Height |
|---|----------|--------------|--------|------------|----------|
| 1 | 7.549    | 2320810      | 50.17  | 124772     | 65.73    |
| 2 | 14.059   | 2305034      | 49.83  | 65065      | 34.27    |

USTC

Project Name: linan  
 Reported by User: System

Breeze

| SAMPLE INFORMATION |                |                  |                       |  |  |
|--------------------|----------------|------------------|-----------------------|--|--|
| Sample Name:       | LN-10-31-od30% | Acquired By:     | System                |  |  |
| Sample Type:       | Unknown        | Date Acquired:   | 10/13/2009 1:29:26 PM |  |  |
| Vial:              | 1              | Acq. Method:     | LN100%A               |  |  |
| Injection #:       | 2              | Date Processed:  | 10/13/2009 1:49:42 PM |  |  |
| Injection Volume:  | 20.00 ul       | Channel Name:    | 2487Channel 1         |  |  |
| Run Time:          | 120.00 Minutes | Sample Set Name: |                       |  |  |

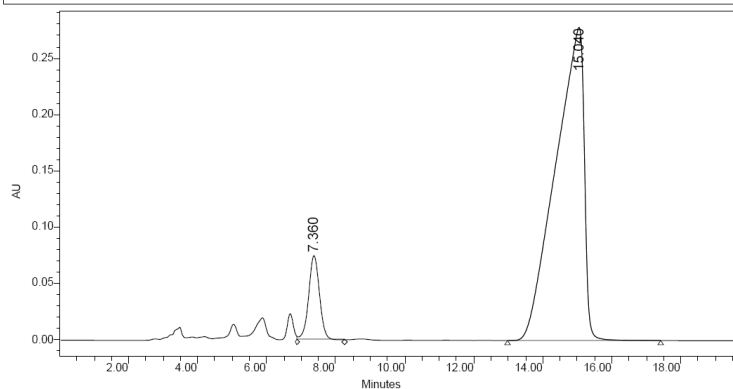

|   | RT (min) | Area (V*sec) | % Area | Height (V) | % Height |
|---|----------|--------------|--------|------------|----------|
| 1 | 7.360    | 1673889      | 9.48   | 75157      | 21.28    |
| 2 | 15.040   | 15987336     | 90.52  | 278010     | 78.72    |

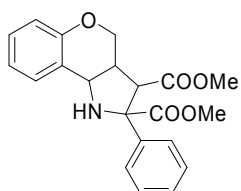

USTC

Project Name: linan  
 Reported by User: System

Breeze

| SAMPLE INFORMATION |               |                  |                     |
|--------------------|---------------|------------------|---------------------|
| Sample Name:       | In-6-12-ad10% | Acquired By:     | System              |
| Sample Type:       | Unknown       | Date Acquired:   | 5/6/2008 7:27:09 PM |
| Vial:              | 1             | Acq. Method:     | linanmethod10%      |
| Injection #:       | 1             | Date Processed:  | 5/6/2008 7:44:43 PM |
| Injection Volume:  | 20.00 ul      | Channel Name:    | 2487Channel 1       |
| Run Time:          | 60.00 Minutes | Sample Set Name: |                     |

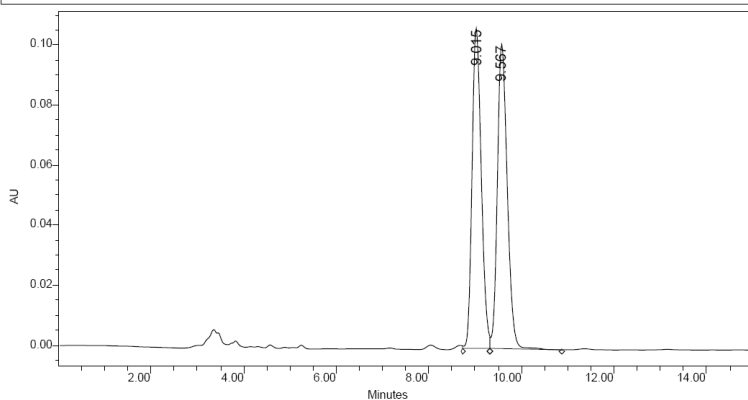

|   | RT (min) | Area (V*sec) | % Area | Height (V) | % Height |
|---|----------|--------------|--------|------------|----------|
| 1 | 9.015    | 1489410      | 49.46  | 107074     | 51.30    |
| 2 | 9.567    | 1522221      | 50.54  | 101655     | 48.70    |

USTC

Project Name: linan  
 Reported by User: System

Breeze

| SAMPLE INFORMATION |                |                  |                       |
|--------------------|----------------|------------------|-----------------------|
| Sample Name:       | LN-10-37-ad10% | Acquired By:     | System                |
| Sample Type:       | Unknown        | Date Acquired:   | 11/3/2009 11:29:11 AM |
| Vial:              | 1              | Acq. Method:     | linanmethod10%        |
| Injection #:       | 1              | Date Processed:  | 11/3/2009 11:43:31 AM |
| Injection Volume:  | 20.00 ul       | Channel Name:    | 2487Channel 1         |
| Run Time:          | 120.00 Minutes | Sample Set Name: |                       |

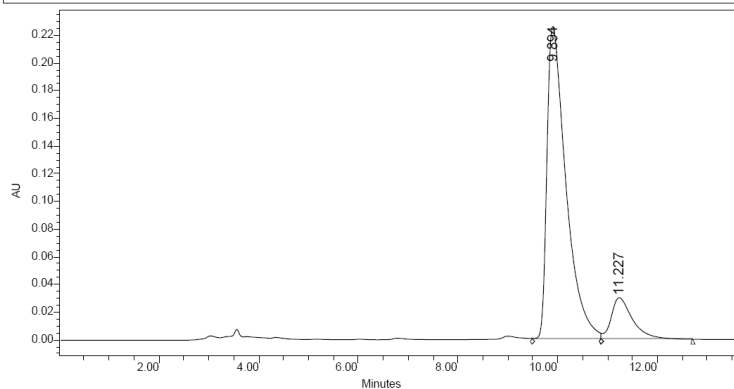

|   | RT (min) | Area (V*sec) | % Area | Height (V) | % Height |
|---|----------|--------------|--------|------------|----------|
| 1 | 9.894    | 6006308      | 86.94  | 226192     | 88.24    |
| 2 | 11.227   | 901942       | 13.06  | 30139      | 11.76    |
